# Supplementary material for: On the Nature of the Rotational Energy Barrier of Atropisomeric Hydrazides
Source: MDPI journal article supplement (doi:10.3390/molecules28237856), 2023-11-29
Supplement: s1 [file s1]

# On the Nature of the Rotational Energy Barrier of Atropisomeric Hydrazides

Andrea Pellegrini<sup>1,2</sup>, Laura Marcon<sup>1</sup>, Paolo Righi<sup>1,2,3</sup>, Giovanni Centonze<sup>1,2</sup>, Chiara Portolani<sup>1,2</sup>, Marco Capodiferro<sup>1</sup>, Shilashi Basasa Oljira<sup>4</sup>, Simone Manetto<sup>4</sup>, Alessia Ciogli<sup>4</sup> and Giorgio Bencivenni<sup>1,2,3,\*</sup>

<sup>1</sup>Department of Industrial Chemistry "Toso Montanari" - Alma Mater Studiorum University of Bologna, via P. Gobetti 85, 40129 Bologna, Italy

<sup>2</sup>Center for the Chemical Catalysis—C<sup>3</sup>, Alma Mater Studiorum University of Bologna, via P. Gobetti 85, 40129 Bologna, Italy

<sup>3</sup>National Interuniversity Consortium of Materials Science and Technology (INSTM)—Bologna Research Unit—via P. Gobetti 85, 40129 Bologna, Italy

<sup>4</sup>Department of Chemistry and Technologies of Drug, Sapienza University of Rome, piazzale A. Moro 5, 00185 Rome, Italy

\*Correspondence: giorgio.bencivenni2@unibo.it

## Supporting information

|                                                         |           |
|---------------------------------------------------------|-----------|
| <b>Synthesis of tetrasubstituted hydrazides</b>         | <b>2</b>  |
| Alkylation strategy <sup>1</sup>                        | 2         |
| Acylation strategy                                      | 3         |
| Consecutive alkylation strategy                         | 4         |
| <b>Materials for HPLC method development</b>            | <b>6</b>  |
| <b>Computational study</b>                              | <b>11</b> |
| General information                                     | 11        |
| Conformational searches and refinement of the ensembles | 11        |
| TS search for the N—N axial epimerization               | 18        |
| DIM Analysis                                            | 33        |
| <b>Geometries</b>                                       | <b>39</b> |

## General

All the NMR spectra were recorded on Gemini 400 MHz or Mercury 600 MHz Varian spectrometers for  $^1\text{H}$ , 101 MHz for  $^{13}\text{C}$ . The chemical shifts ( $\delta$ ) for  $^1\text{H}$ ,  $^{13}\text{C}$  are given in ppm relative to internal standard TMS (0.0 ppm) or residual signals of  $\text{CHCl}_3$  (7.26 ppm). The following abbreviations are used to indicate the multiplicity: s, singlet; d, doublet; t, triplet; q, quartet; m, multiplet; bs, broad signal. Purification of reaction products was carried out by flash chromatography on silica gel (230-400 mesh). Organic solutions were concentrated under reduced pressure on a Büchi rotary evaporator. All reagents used are commercially available and purchased from suppliers. Procedures using bromide derivatives have been taken from literature<sup>[1]</sup> and  $^1\text{H}$ NMR of the products were consistent with those previously reported. Procedures using anhydrides and the two-step synthesis have not been optimized.

### Synthesis of tetrasubstituted hydrazides

#### Alkylation strategy<sup>[1]</sup>

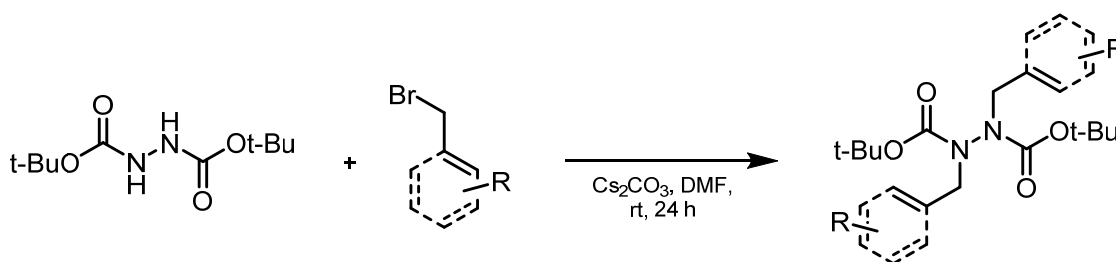

#### General procedure:

To a suspension of  $\text{Cs}_2\text{CO}_3$  (3 eq) in DMF [0.6] were added di-tert-butyl hydrazine-1,2-dicarboxylate (1 eq) and the corresponding benzyl bromide (3 eq); only in the case of the synthesis of the compound **D4** 4 eq of allyl bromide were required. The reaction was quenched after 24 hours with distilled water and the mixture was extracted three times with ethyl acetate. The organic phases were collected, washed with brine, dried on  $\text{Na}_2\text{SO}_4$  and finally concentrated under reduced pressure. Products **A1**, **B2**, **D4** didn't require further purifications; the compound **C3** was isolated after a flash-chromatography (mixture: 1:6  $\text{Et}_2\text{O}/n\text{-hexane}$ ).

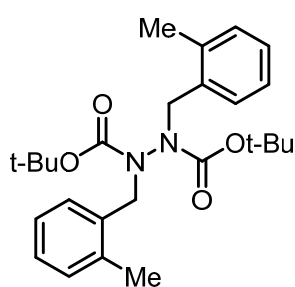

**A1** yield: 72%

**Melting point:** 74°C

**[M+H]<sup>+</sup>** found = 441.2746 m/z; calculated = 441.2748 m/z

**$^1\text{H}$  NMR** (400 Hz,  $\text{CDCl}_3$ )  $\delta$  7.23 - 6.87 (m, 8H), 4.87 - 3.87 (m, 4H), 2.40 - 2.12 (m, 6H), 1.55 - 1.11 (m, 18H).

**$^{13}\text{C}$  NMR** (101 MHz,  $\text{CDCl}_3$ )  $\delta$  154.73, 137.70, 134.50, 131.29, 130.24, 127.94, 125.78, 125.51, 80.69, 48.57, 28.18, 27.86, 19.73.

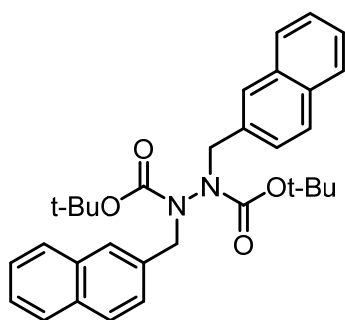

**B2** yield: 71%

**Melting point:** 87°C

**[M+H]<sup>+</sup>** found = 513.2754 m/z; calculated = 513.2748 m/z

**<sup>1</sup>H NMR** (400 Hz, CDCl<sub>3</sub>) δ 7.87 - 7.10 (m, 14H), 5.38 - 4.29 (m, 4H), 1.50 - 1.24 (m, 18H).

**<sup>13</sup>C NMR** (151 MHz, CDCl<sub>3</sub>) δ 192.27, 160.83, 156.33, 155.45, 155.18, 154.61, 136.49, 135.03, 134.84, 134.61, 134.58, 134.38, 134.16, 133.29, 133.23, 133.20, 133.16, 133.05, 133.00, 132.82, 132.78, 132.68, 132.64, 132.62, 132.58, 132.55, 129.59, 129.56, 129.13, 128.54, 128.49, 128.40, 128.31, 128.10, 128.05, 127.95, 127.92, 127.79, 127.75, 127.73, 127.71, 127.68, 127.62, 127.60, 127.57, 127.50, 127.37, 127.28, 127.19, 127.11, 127.06, 126.93, 126.60, 126.47, 126.45, 126.42, 126.36, 125.97, 125.87, 125.84, 125.81, 125.68, 125.55, 123.61, 122.80, 81.87, 81.61, 81.20, 81.13, 81.08, 80.94, 69.94, 65.85, 56.02, 55.83, 54.14, 53.30, 51.49, 46.51, 29.76, 28.36, 28.08, 15.33, 14.19.

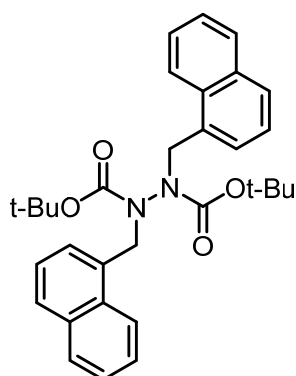

**C3** yield: 43%

**Melting point:** 165°C

**[M+H]<sup>+</sup>** found = 513.2753 m/z; calculated = 513.2748 m/z

**<sup>1</sup>H NMR** (400 MHz, CDCl<sub>3</sub>) δ 8.34 – 8.22 (m, 2H), 7.83 (m, 2H), 7.79 – 7.69 (m, 2H), 7.65 – 7.48 (m, 2H), 7.52 – 7.44 (m, 2H), 7.42 – 7.26 (m, 2H), 7.15 – 7.02 (m, 2H), 5.07-5.00 (m, 2H), 4.63 – 4.48 (m, 2H), 0.97-0.88 (m, 18H).

**<sup>13</sup>C NMR** (101 MHz, CDCl<sub>3</sub>) δ 154.58, 133.68, 132.64, 132.44, 129.23, 128.91, 128.69, 128.65, 128.42, 126.34, 125.74, 125.13, 125.02, 80.58, 48.61, 28.41, 27.57, 27.34.

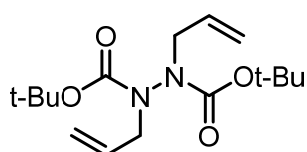

**D4** yield: 63%.

**<sup>1</sup>H NMR** (400 Hz, CDCl<sub>3</sub>) δ 5.97 - 5.82 (m, 2H), 5.24 - 5.06 (m, 4H), 4.07 - 3.81 (m, 4H), 1.51 - 1.39 (m, 18H).

**<sup>13</sup>C NMR** (101 MHz, CDCl<sub>3</sub>) δ 155.38, 154.69, 154.29, 134.01, 133.91, 133.49, 118.08, 117.81, 117.23, 81.04, 80.91, 80.83, 54.75, 52.60, 52.56, 28.22, 28.15.

### Acylation strategy

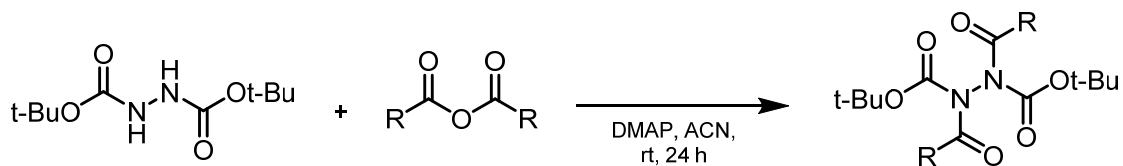

#### General procedure:

To a solution of di-*tert*-butyl hydrazine-1,2-dicarboxylate (1 eq) and 4-dimethylamino-pyridine (DMAP)(1 eq) in acetonitrile [0.5], was added the corresponding anhydride (6 eq). After the consumption of the starting hydrazide monitored by TLC, the reaction was diluted with Et<sub>2</sub>O and extracted firstly with 0.1 N HCl solution, then with 1 M KOH solution. The organic phase was eventually washed with the brine solution, then dried on Na<sub>2</sub>SO<sub>4</sub> and concentrated under reduced pressure. The products didn't require further purifications.

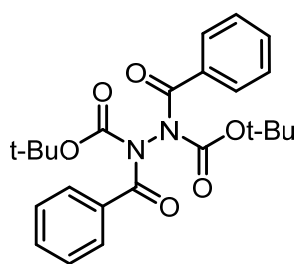

**E5** yield: 54%

**Melting point:** 105°C

**[M+H]<sup>+</sup>** found = 441.2020 m/z; calculated = 441.2014 m/z

**<sup>1</sup>H NMR** (400 Hz, CDCl<sub>3</sub>) δ 7.78-7.73 (m, 4H), 7.57-7.51 (m, 2H), 7.47-7.41 (m, 4H), 1.28(s, 18H).

**<sup>13</sup>C NMR** (101 MHz, CDCl<sub>3</sub>) δ 169.70, 150.67, 135.39, 133.73, 131.82, 130.18, 128.48, 128.22, 128.11, 84.84, 27.42.

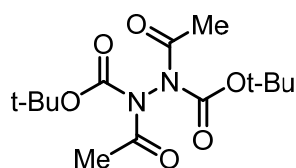

**F6** yield: 77%

**[M+H]<sup>+</sup>** found = 317.1707 m/z; calculated = 317.1704 m/z

**<sup>1</sup>H NMR** (400 Hz, CDCl<sub>3</sub>) δ 2.54 (s, 6H), 1.49 (s, 18H).

**<sup>13</sup>C NMR** (151 MHz, CDCl<sub>3</sub>) δ 206.96, 170.92, 168.71, 155.82, 154.30, 151.59, 150.26, 84.55, 84.43, 84.29, 84.17, 81.77, 81.28, 65.78, 30.84, 28.12, 28.07, 27.81, 27.73, 25.31, 25.05, 15.19

### Consecutive alkylation strategy

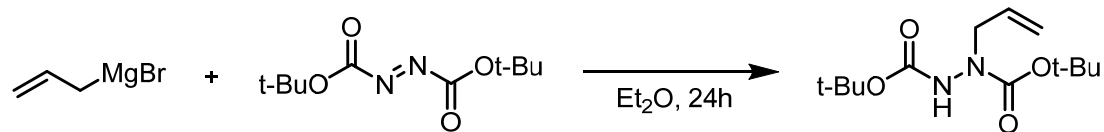

To a mixture of di-*tert*-butyl diazene-1,2-dicarboxylate (1 eq) in anhydrous  $\text{Et}_2\text{O}$  [0.5], allylmagnesium bromide (1 M in  $\text{Et}_2\text{O}$ , 2 eq) was added dropwise at  $0^\circ\text{C}$ . After 24 hours, the solution was quenched with a saturated ammonium chloride solution and then extracted with dichloromethane (DCM). The crude was purified with a flash chromatography (2:1 DCM/*n*-hexane).

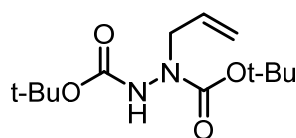

Yield: 42%

$^1\text{H}$ NMR and  $^{13}\text{C}$ NMR were identical to those reported in the literature<sup>[2]</sup>.

Afterwards, the isolated intermediate was subsequently converted into the compound **G7** performing a phase transfer strategy. Therefore, 1 eq of the trisubstituted hydrazide was dissolved in toluene [0.05] to which was added NaOH 50%w/w (2 times the volume of toluene), tetrabutylammonium bromide (1 eq) and benzyl bromide (1 eq). After one day, the reaction was stopped separating the 2 phases, then extracting the water phase 2 times with  $\text{Et}_2\text{O}$ . The flash chromatography (1:3  $\text{Et}_2\text{O}$ :*n*-hexane) allowed the isolation of **G7** with a total yield of 58%.

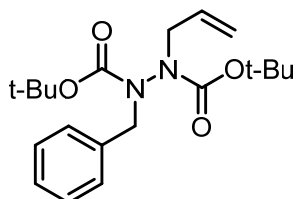

**G7**: yield: 58%

$[\text{M}+\text{H}]^+$  found = 363.2278 m/z; calculated = 363.2285 m/z

$^1\text{H}$  NMR (400 Hz,  $\text{CDCl}_3$ )  $\delta$  8.18 - 6.92 (m, 5H), 5.85 - 3.46 (m, 7H), 1.62 - 1.16 (m, 18H).

$^{13}\text{C}$  NMR (101 MHz,  $\text{CDCl}_3$ )  $\delta$  156.02, 155.31, 155.02, 154.90, 154.61, 154.40, 154.21, 137.21, 137.18, 136.77, 136.68, 133.75, 133.30, 129.77, 129.75, 129.40, 129.10, 128.94, 128.30, 128.27, 128.25, 128.21, 128.02, 127.61, 127.50, 127.49, 127.44, 117.91, 117.57, 116.83, 81.29, 81.09, 81.01, 80.98, 80.80, 80.75, 55.21, 54.94, 53.18, 52.82, 52.65, 52.63, 52.51, 28.24, 28.17, 28.06, 28.01, 27.97.

# **NMR traces**

<sup>1</sup>H NMR (400 Hz, CDCl<sub>3</sub>)

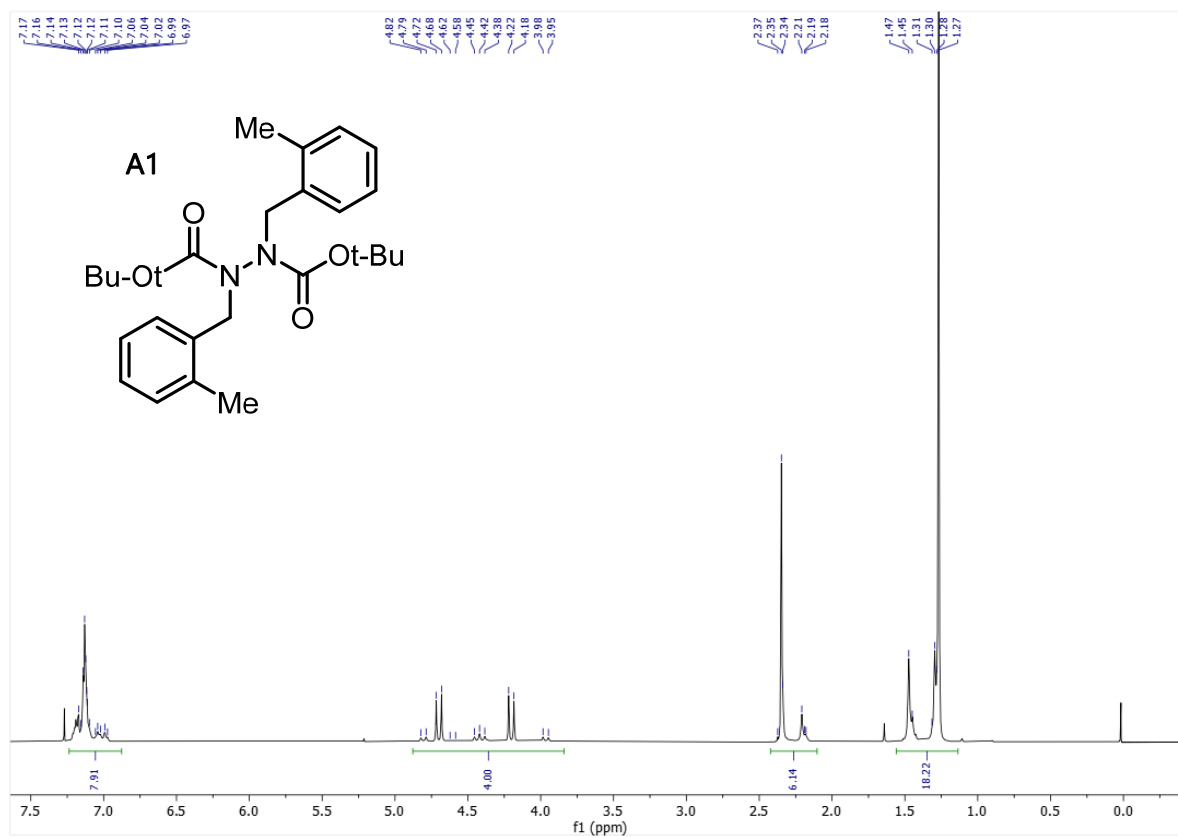

<sup>13</sup>C NMR (101 MHz, CDCl<sub>3</sub>)

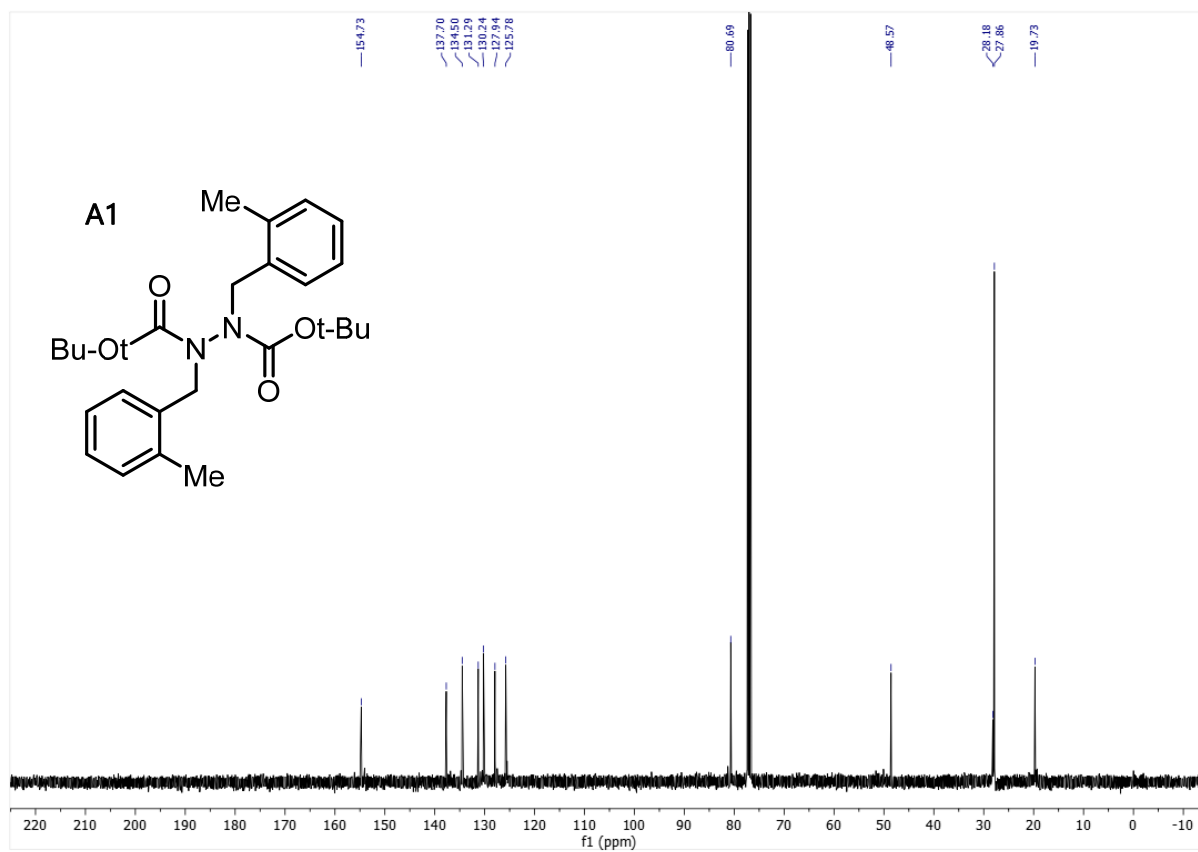

$^1\text{H}$  NMR (400 Hz,  $\text{CDCl}_3$ )

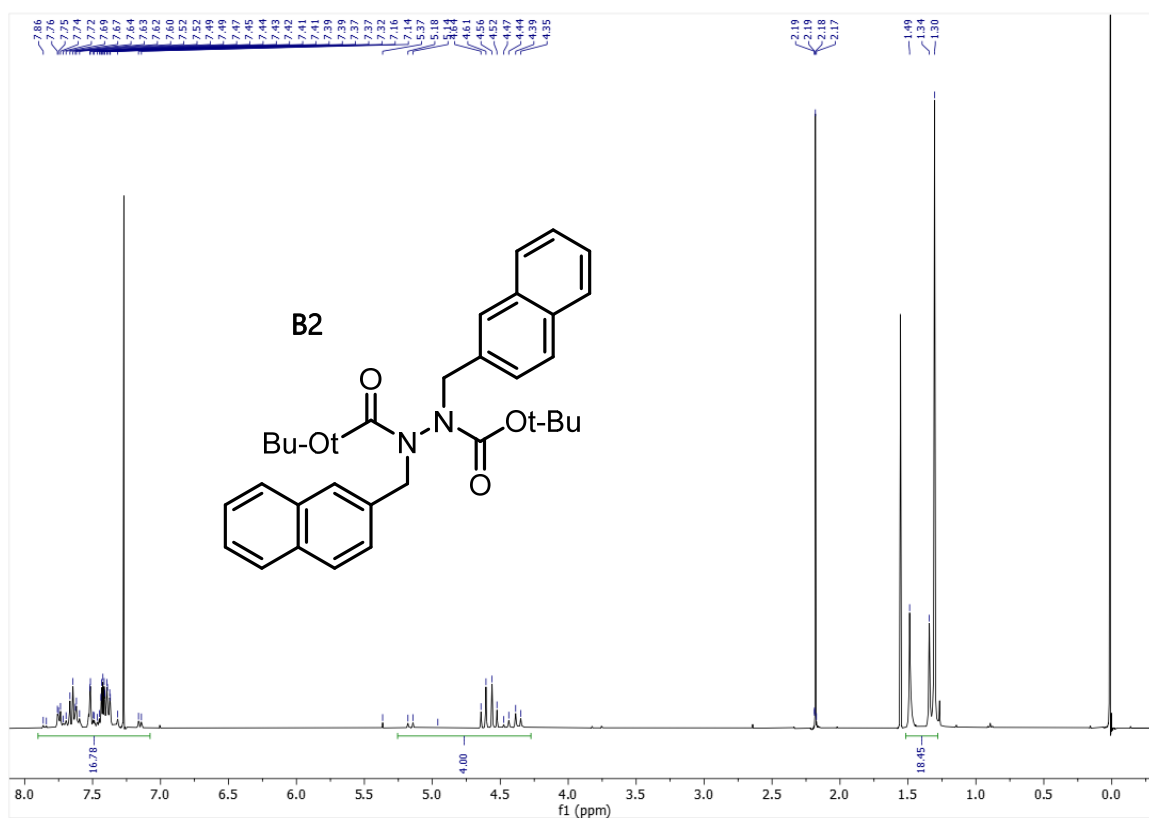

$^{13}\text{C}$  NMR (101 MHz,  $\text{CDCl}_3$ )

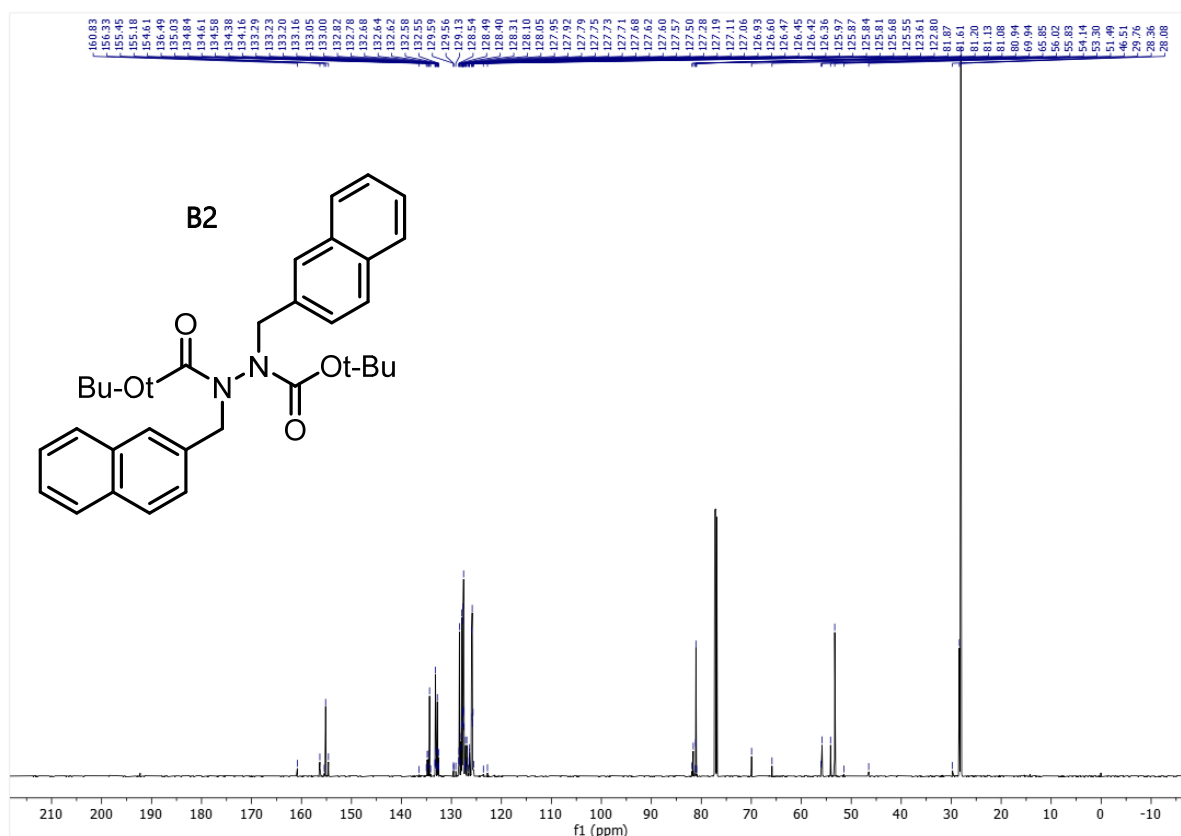

<sup>1</sup>H NMR (400 Hz, CDCl<sub>3</sub>)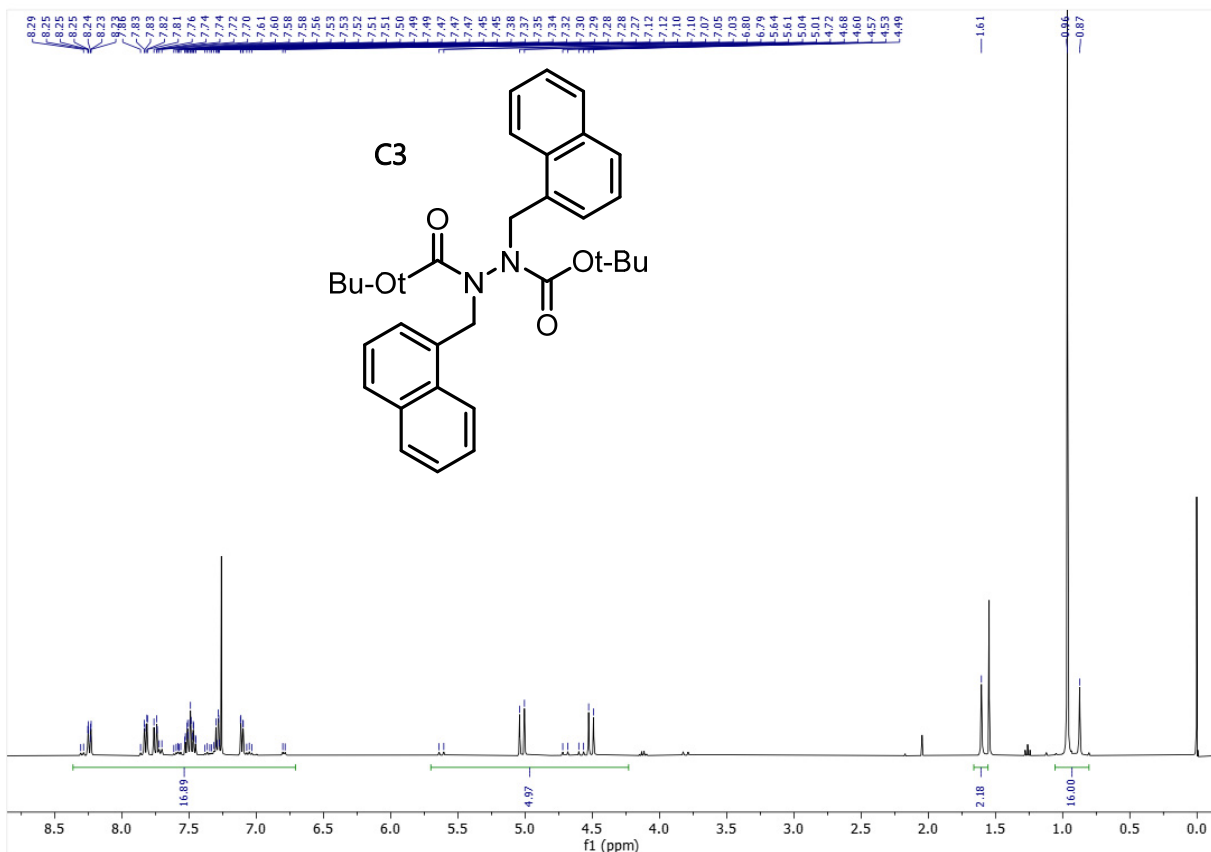

**<sup>13</sup>C NMR** (101 MHz, CDCl<sub>3</sub>)

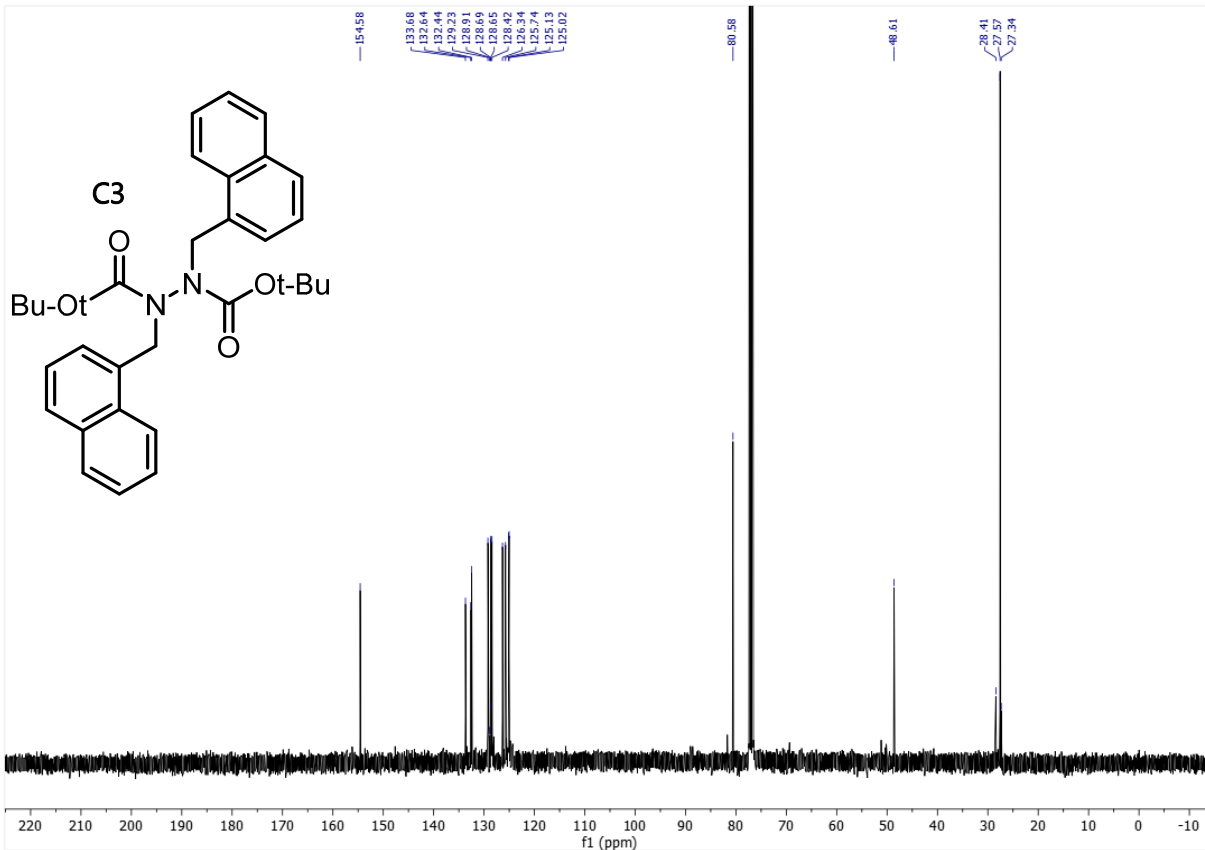



$^1\text{H}$  NMR (400 Hz,  $\text{CDCl}_3$ )

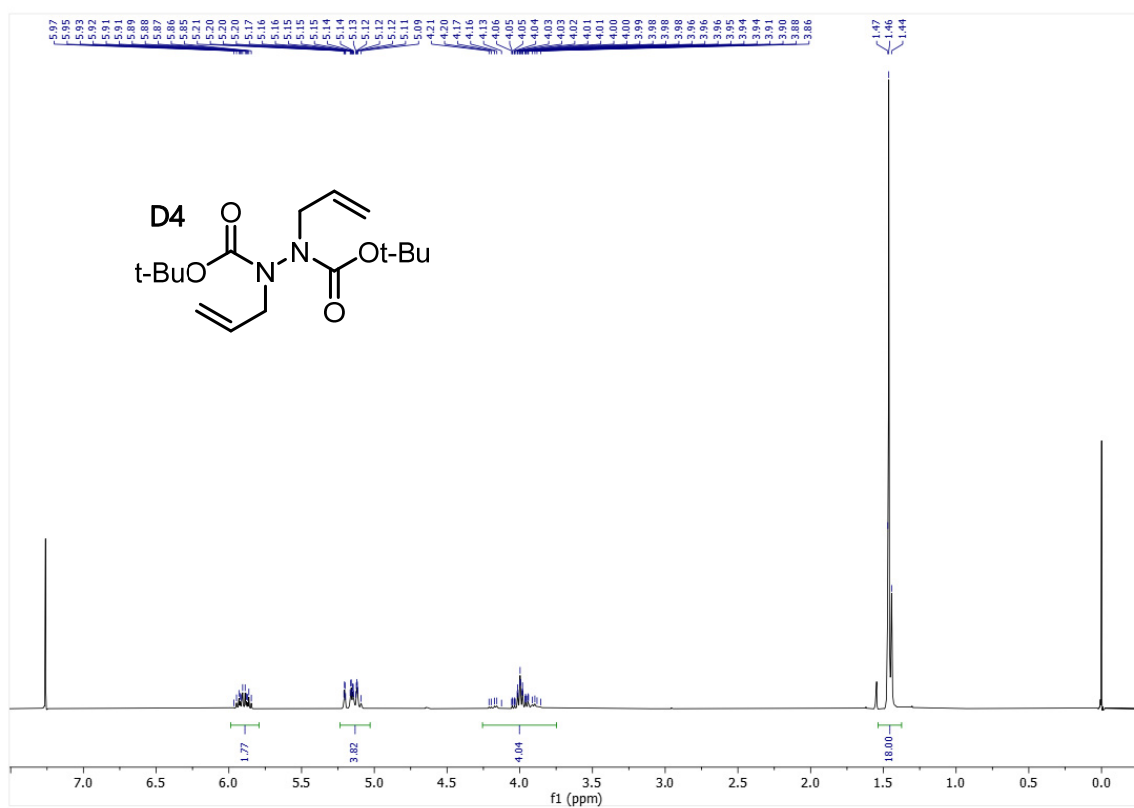

$^{13}\text{C}$  NMR (101 MHz,  $\text{CDCl}_3$ )

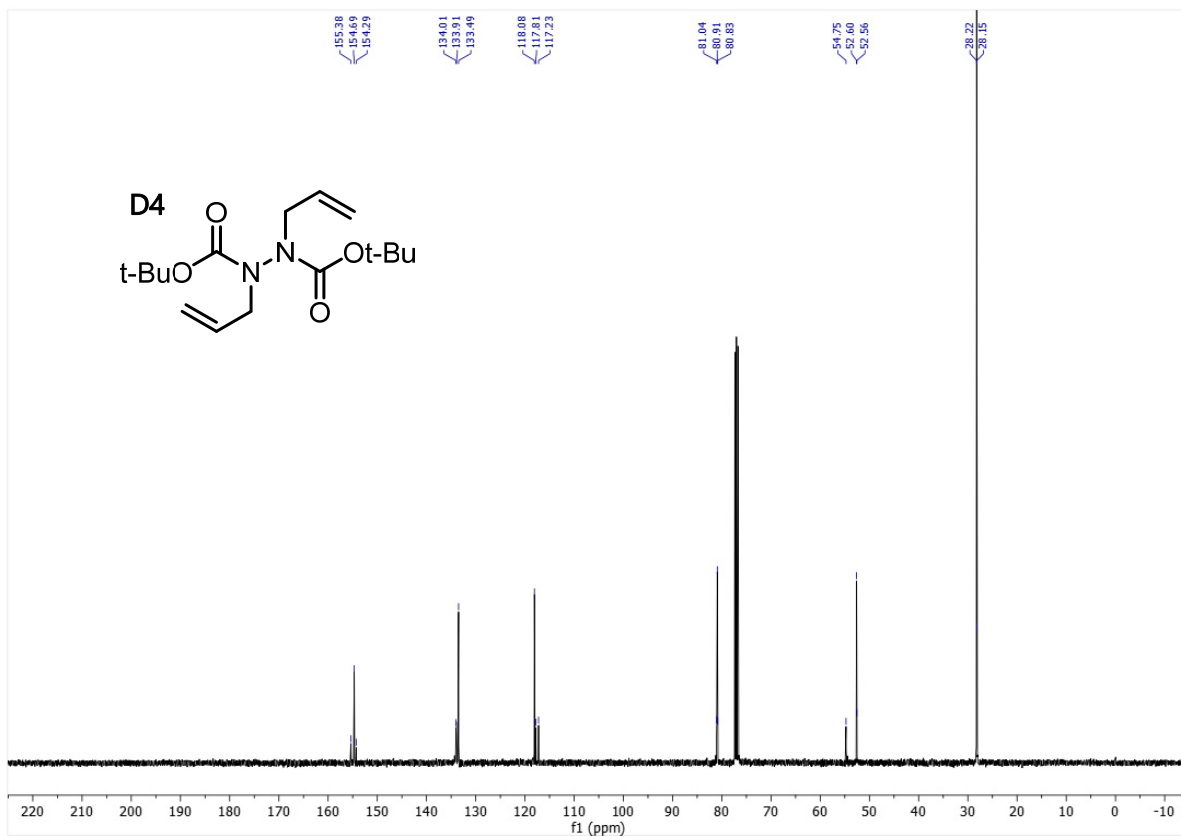

<sup>1</sup>H NMR (400 Hz, CDCl<sub>3</sub>)

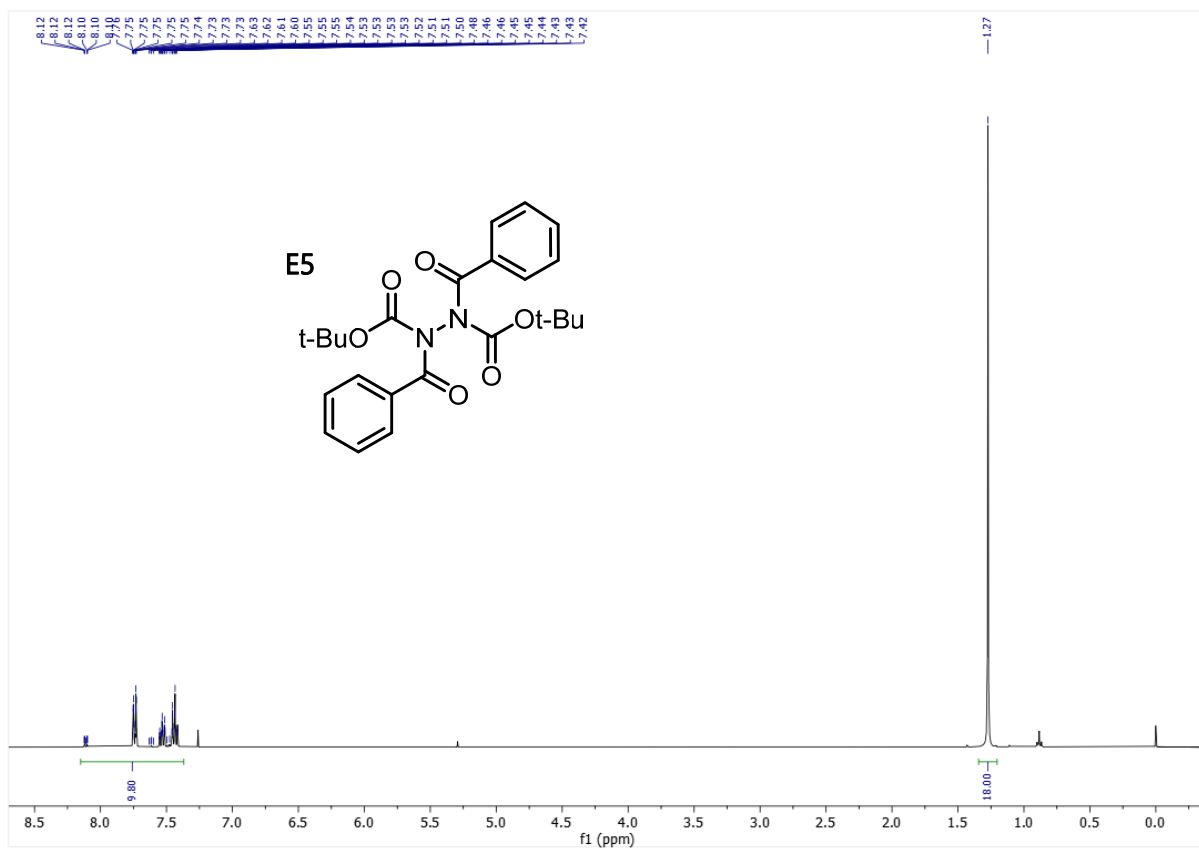

<sup>13</sup>C NMR (101 MHz, CDCl<sub>3</sub>)

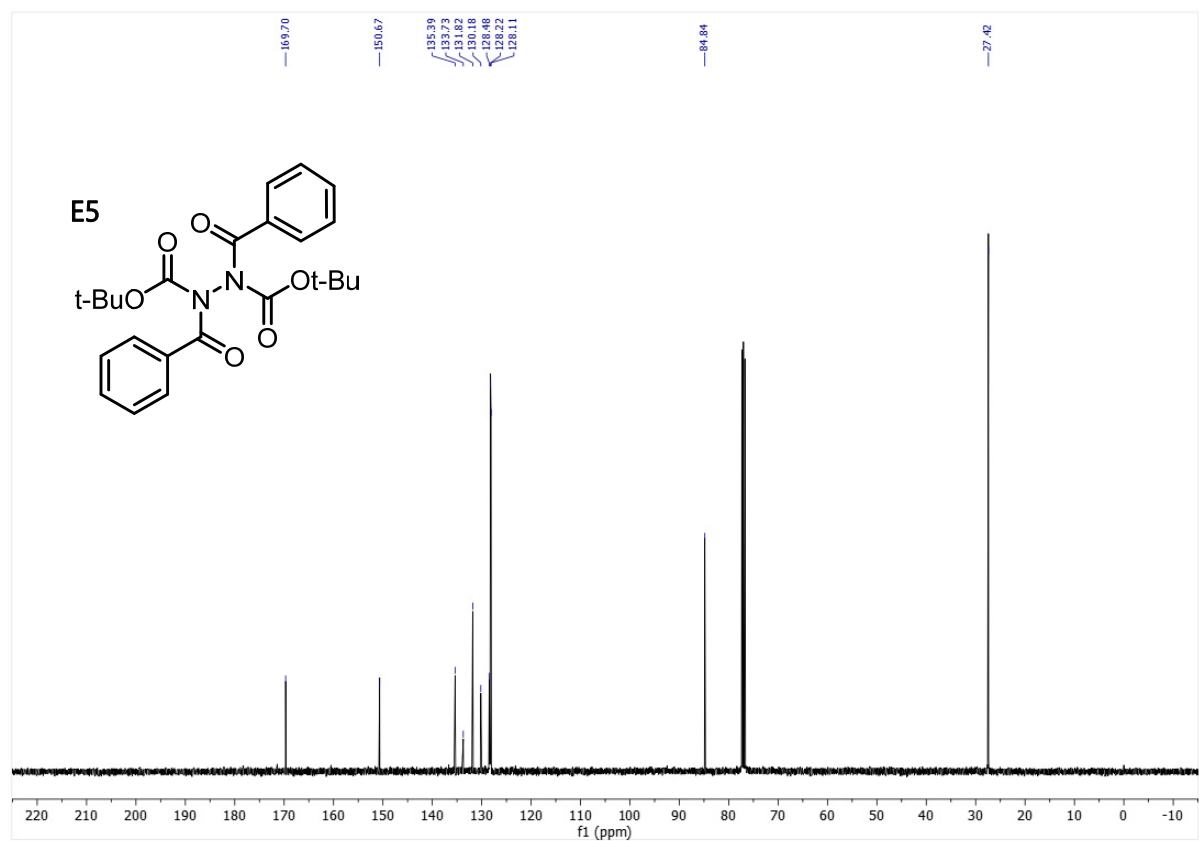

$^1\text{H}$  NMR (400 Hz,  $\text{CDCl}_3$ )

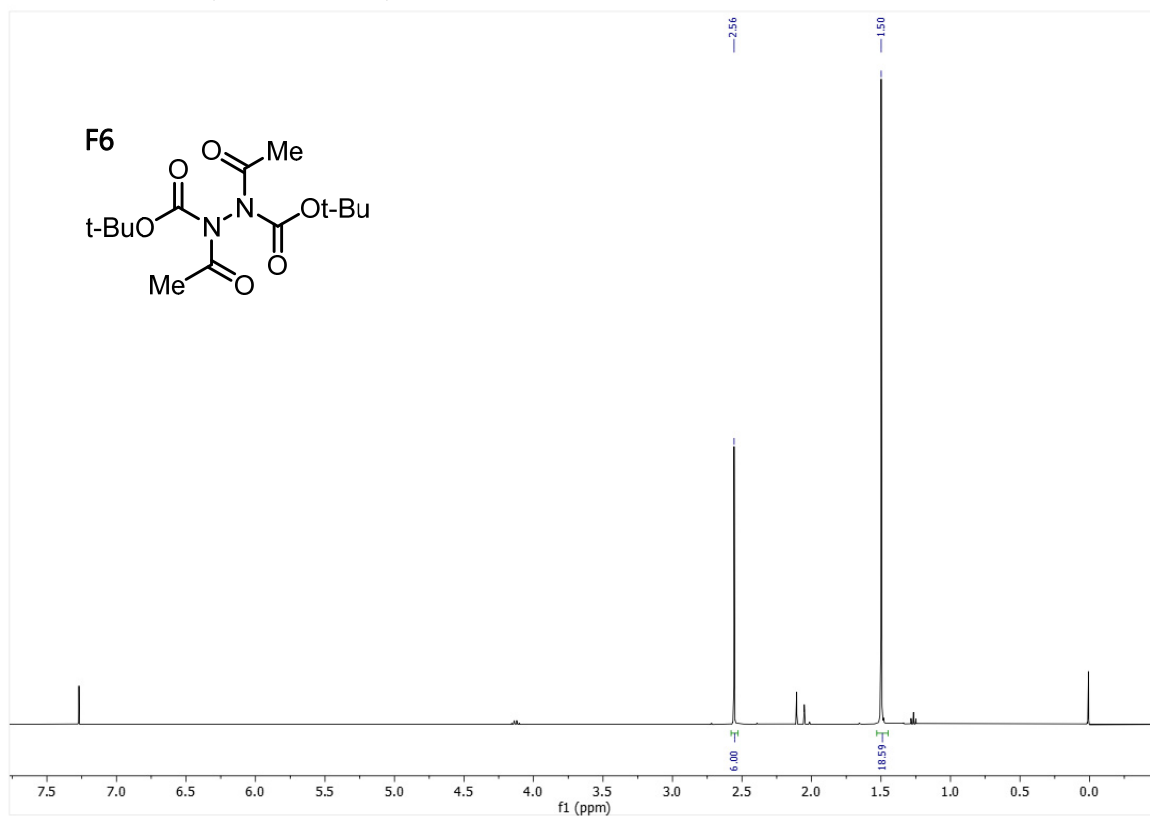

$^{13}\text{C}$  NMR (101 MHz,  $\text{CDCl}_3$ )

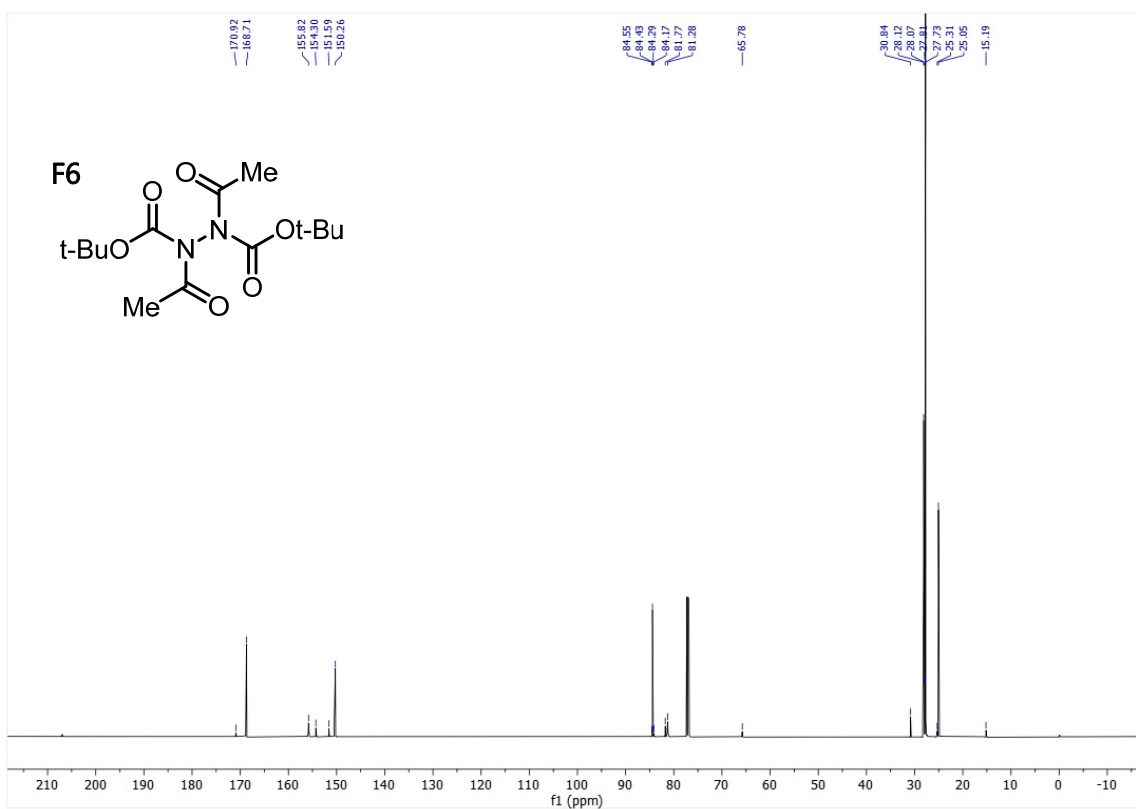

<sup>1</sup>H NMR (400 Hz, CDCl<sub>3</sub>)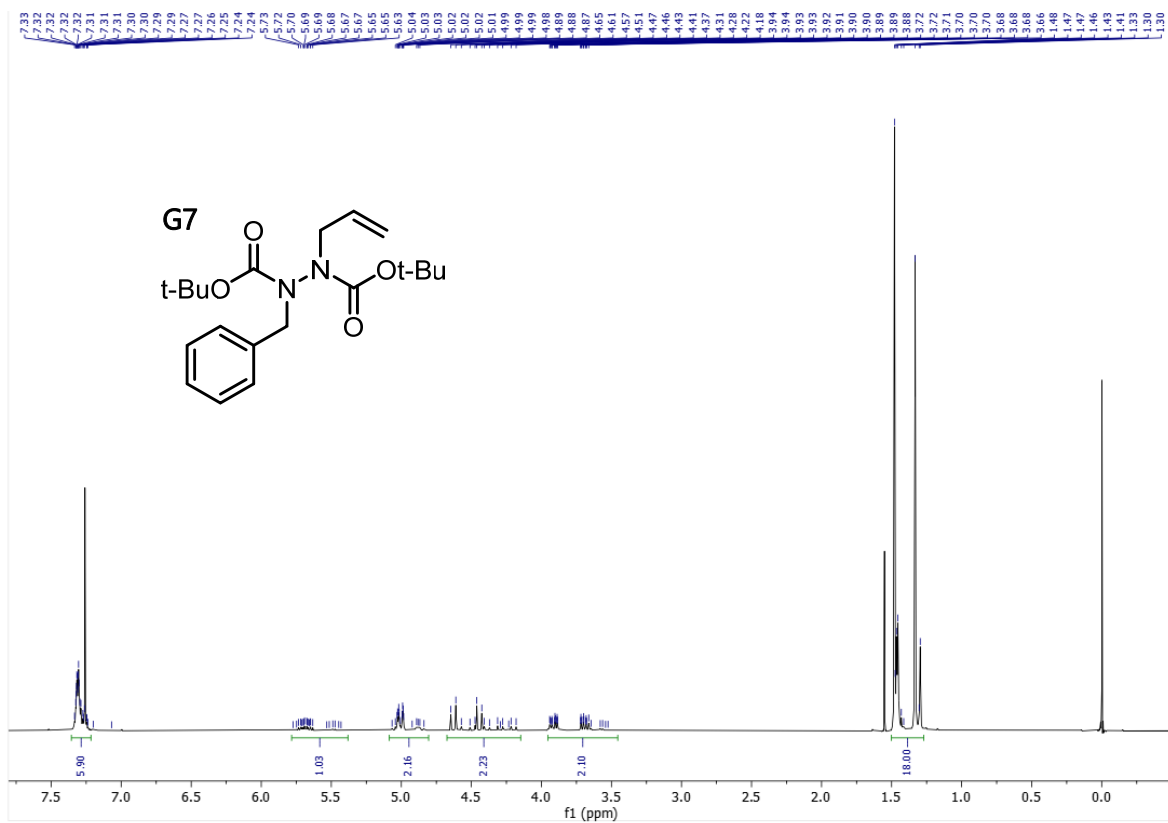 $^{13}\text{C}$  NMR (101 MHz,  $\text{CDCl}_3$ )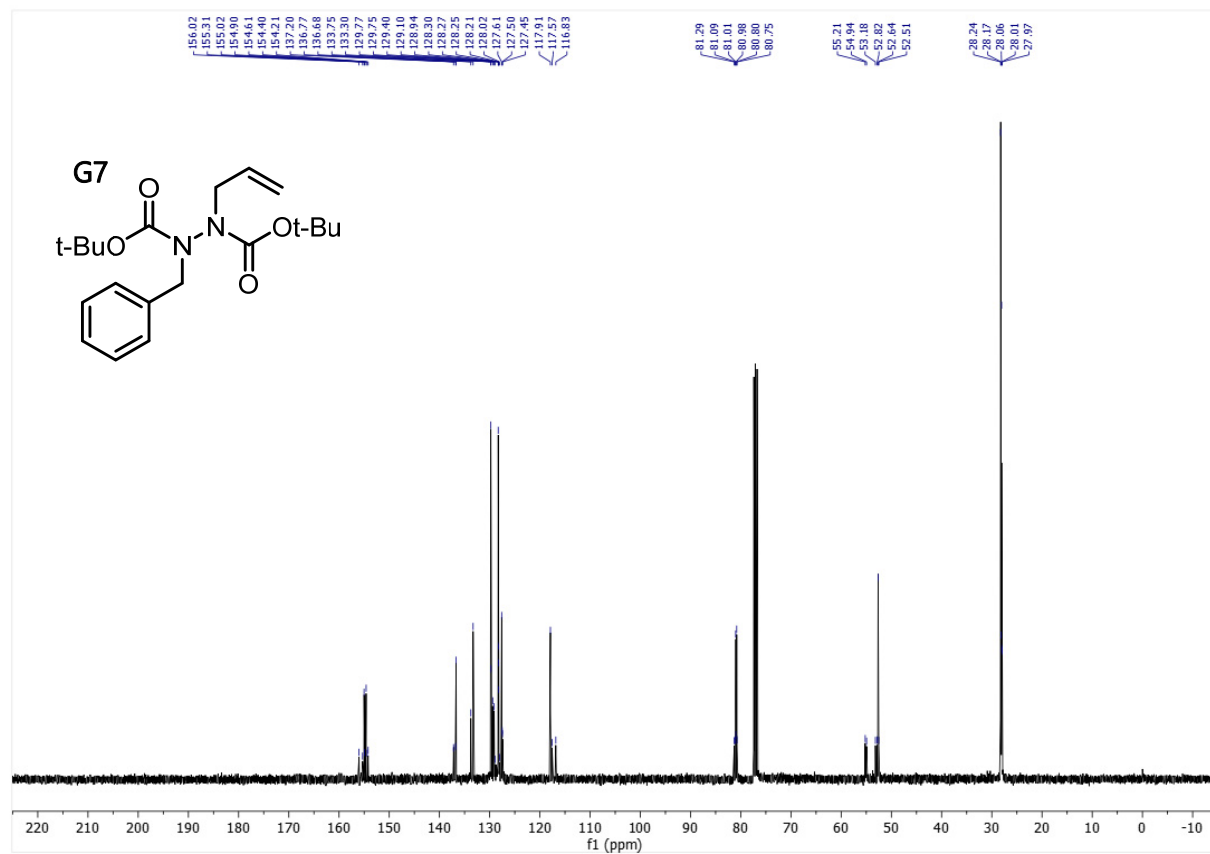

## *Materials for HPLC method development*

All solvents were LC grade and were purchased from Sigma-Aldrich (St. Louis, MO, USA). Solutions of samples were prepared in mobile phases.

Analytical HPLC columns were employed: Chiralpak IB (250\*4.6 mm ID) and Chiralpak IG-3 (250\*4.6 mm ID) from Daicel Corporation (Osaka, Japan), Lux-cellulose 5micron (150\*4.6 mm ID) from Phenomenex (Torrance, CA, USA), (R,R)-Whelk-O1 (250\*4.6 mm ID) and (R,R)-Whelk-O1 (150\*4.6 mm ID) from Regis Technologies (Morton Grove, IL, USA).

### *Instrumentation*

A Jasco LC (Jasco Europe, LC, Italy) equipped with dual gradient pumps was employed and connected with UV975 and UV-CD 955 detectors and with a column module. The heating was set by using in-house sheath with a 30°-80°C temperature range. Column temperature was maintained within  $\pm 0.5$  °C by means of an electronic controller. For lower temperatures, an ice/water filled Dewar was employed. The uncertainty in temperature measurements can be estimated as  $\pm 0.5$  °C.

### *Analytical conditions*

**Sample D4:** (R,R) Whelk-O1 CSP (150 x 4.6 mm, L x ID), eluent hexane/2-propanol 90/10, flow rate 1.0 ml/min, UV 254 (weak CD signal at 265 nm: 1<sup>st</sup> eluted (-), 2<sup>nd</sup> eluted (+)).

**Sample C3:** Chiralpak IG-3 CSP (250 x 4.6 mm, L x ID), eluent hexane/ethanol 100/5, flow rate 1.0 ml/min, UV 254 (CD signal at 265 nm: 1<sup>st</sup> eluted (-), 2<sup>nd</sup> eluted (+)).

**Sample B2:** (R,R) Whelk-O1 CSP (250 x 4.6 mm, L x ID), eluent hexane/2-propanol 98/2, flow rate 1.0 ml/min, UV 254 (CD signal at 230 nm: 1<sup>st</sup> eluted (-), 2<sup>nd</sup> eluted (+)).

**Sample A1:** Lux 5  $\mu$ m Cellulose-1 (150 x 4.6 mm, L x ID), eluent hexane/ethanol 100/1, flow rate 1.0 ml/min, UV 280 (CD signal at 254 nm: 1<sup>st</sup> eluted (+), 2<sup>nd</sup> eluted (-)).

**Sample F6:** Chiralpak IG-3 CSP (250 x 4.6 mm, L x ID), eluent hexane/2-propanol 100/1, flow rate 1.0 ml/min, UV 254 (CD signal at 265 nm: 1<sup>st</sup> eluted (-), 2<sup>nd</sup> eluted (+)).

**Sample E5:** Chiralpak IB (250 x 4.6 mm, L x ID), eluent hexane/2-propanol 98/2, flow rate 1.0 ml/min, UV 254 (CD signal at 254 nm: 1<sup>st</sup> eluted (+), 2<sup>nd</sup> eluted (-)).

### *Racemization studies*

Racemization experiments were made by off-column approach. Previously HPLC separated enantiomer of each racemate was dissolved in a closed vial and it was heated at a fixed temperature. Samples were withdrawn at fixed time intervals and analyzed by enantioselective HPLC under the analytical conditions reported in the previous section. The solvent used to dissolve samples was 2-propanol in all cases. In addition, only for sample 3, some experiments were done also in decalin.

### Enantiomerization studies

Variable temperature chromatography was performed placing the chiral HPLC column in the specific temperature control module and chromatograms were acquired (n.3 replicate injection for each temperature). Simulations of variable-temperature experimental chromatograms were performed by Auto DHPLC y2k<sup>[3-5]</sup> based on the stochastic model.

| Sample | $k_1$ | $k_2$ | $\alpha$ | T °C |
|--------|-------|-------|----------|------|
| D4     | 6.65  | 8.21  | 1.23     | 25   |
| C3     | 0.43  | 1.93  | 4.49     | 25   |
| B2     | 2.75  | 3.35  | 1.22     | 25   |
| A1     | 0.80  | 0.99  | 1.12     | 25   |
| F6     | 2.95  | 4.13  | 1.40     | 10   |
| E5     | 1.06  | 1.73  | 1.63     | 0    |

Table S1. Chromatographic parameters of samples after baseline optimized separation.

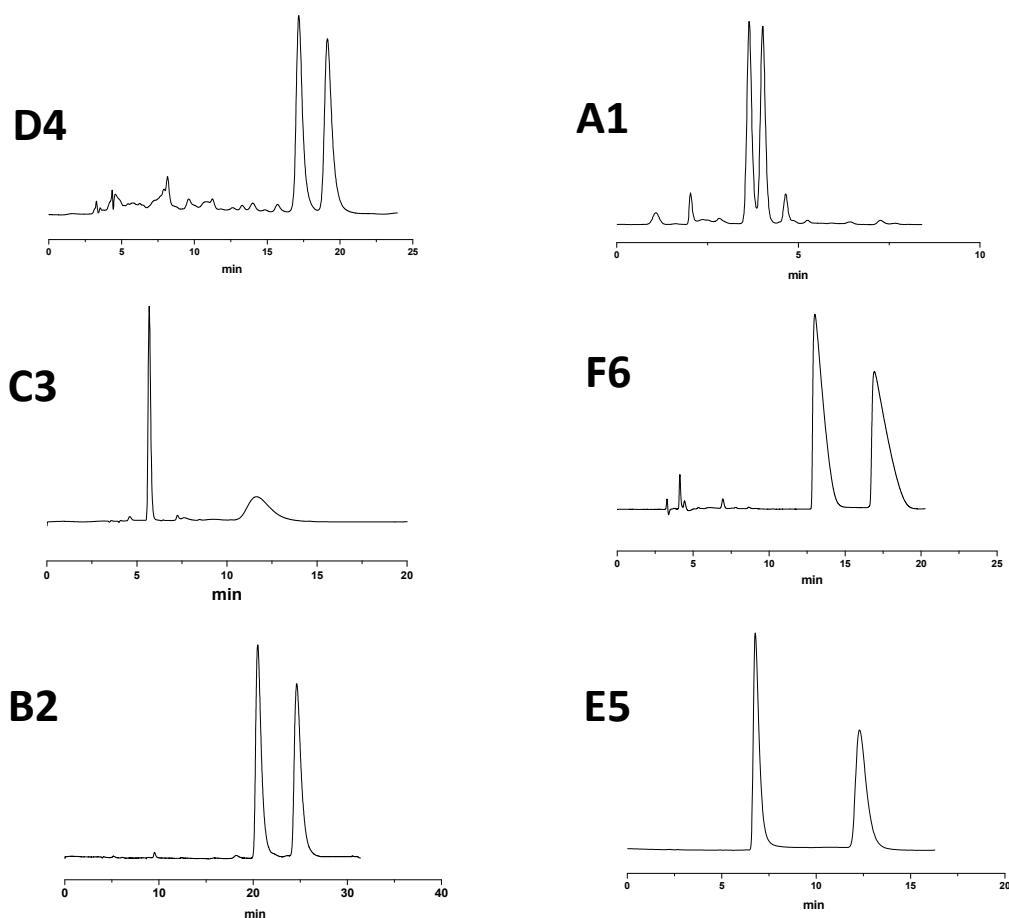

Figure S1. UV Chromatographic profiles of investigated samples.

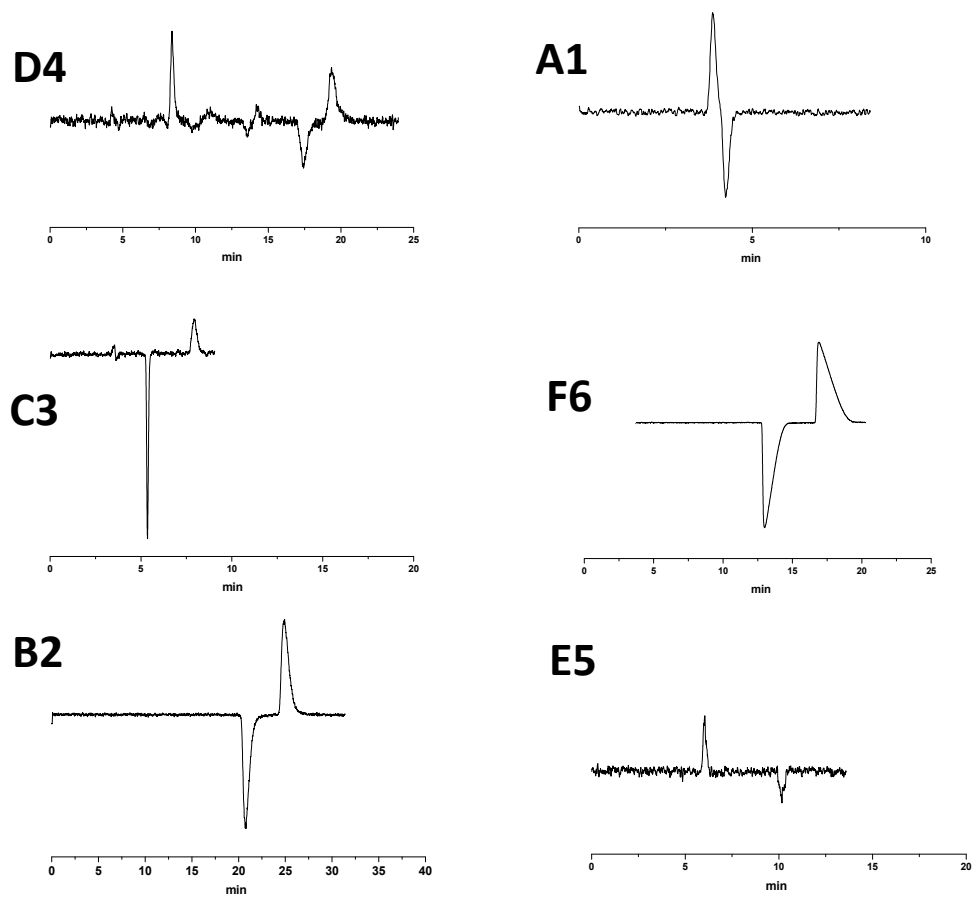

Figure S2. CD Chromatographic profiles of investigated samples.

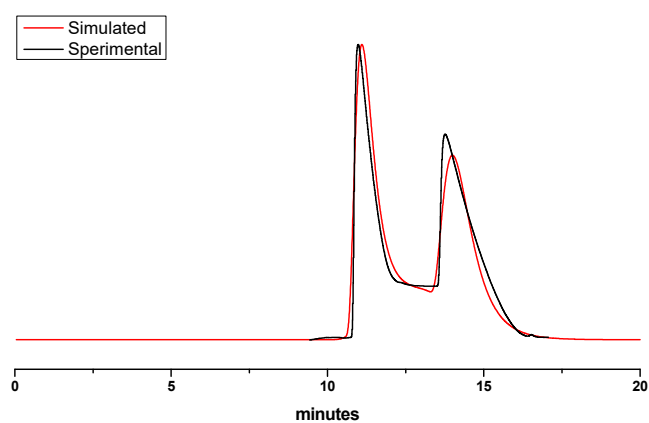

Figure S3. Experimental (black) and simulated (red) chromatographic profiles of F6 sample at 40°C.

| Sample    | T (°C) | $\Delta G_{\text{enant}}^{\#}$ (kcal/mol) | Chromatographic approach |
|-----------|--------|-------------------------------------------|--------------------------|
| <b>B2</b> | 50     | 24.49 <sup>a</sup>                        | Off-column               |
|           | 57     | 24.68                                     |                          |
|           | 62     | 24.73                                     |                          |
|           | 71     | 25.09                                     |                          |
|           | 80     | 25.31                                     |                          |
| <b>E5</b> | 5      | 20.36 <sup>b</sup>                        | On-column                |
|           | 10     | 20.37 <sup>b</sup>                        |                          |
|           | 25     | 20.59 <sup>b</sup>                        |                          |

Table S2. Chromatographic approach for enantiomerization studies of B2 and E5. <sup>a</sup> A value of 24.05 Kcal/mol was found when sample was dissolved in decalin. <sup>b</sup> averaged value between free energy of direct ( $\Delta G_{1 \rightarrow 2}^{\#}$ ) and reversed ( $\Delta G_{2 \rightarrow 1}^{\#}$ ) enantiomerization process.

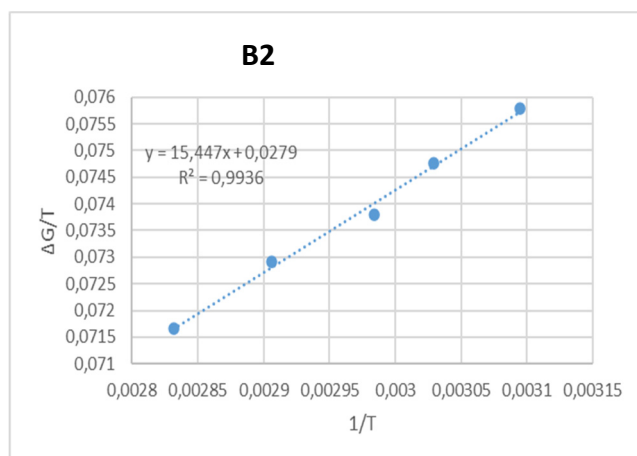

| Temperature | $\Delta G$ | $1/T(^{\circ}K)$ | $\Delta G/T$ |
|-------------|------------|------------------|--------------|
| 50          | 24,49      | 0,0031           | 0,0758       |
| 57          | 24,68      | 0,0030           | 0,0748       |
| 62          | 24,73      | 0,0030           | 0,0738       |
| 71          | 25,09      | 0,0029           | 0,0729       |
| 80          | 25,31      | 0,0028           | 0,0717       |

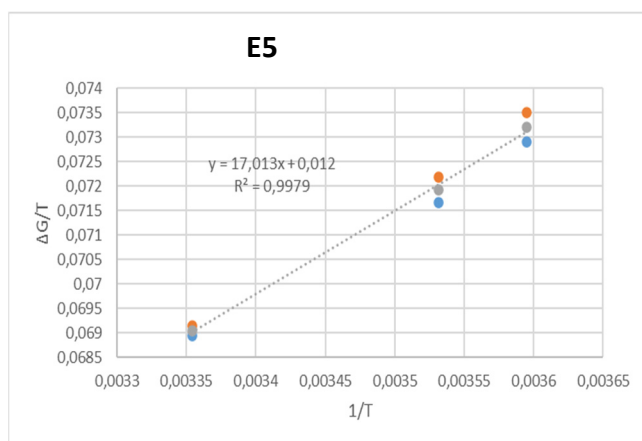

| Temperature | $\Delta G_{\text{averaged}}$ | $1/T(^{\circ}K)$ | $\Delta G_{\text{averaged}}/T$ |
|-------------|------------------------------|------------------|--------------------------------|
| 25          | 20,59                        | 0,00335          | 0,06905                        |
| 10          | 20,37                        | 0,00353          | 0,07193                        |
| 5           | 20,36                        | 0,00360          | 0,07320                        |

Figure S4. Eyring plots of B2 and E5.



## Computational study

### General information

The surfaces were visualized with the Visual Molecular Dynamics<sup>[6]</sup> (VMD) software. Instead, the UCSF Chimera<sup>[7]</sup> software was utilized to visualize geometries and orbitals.

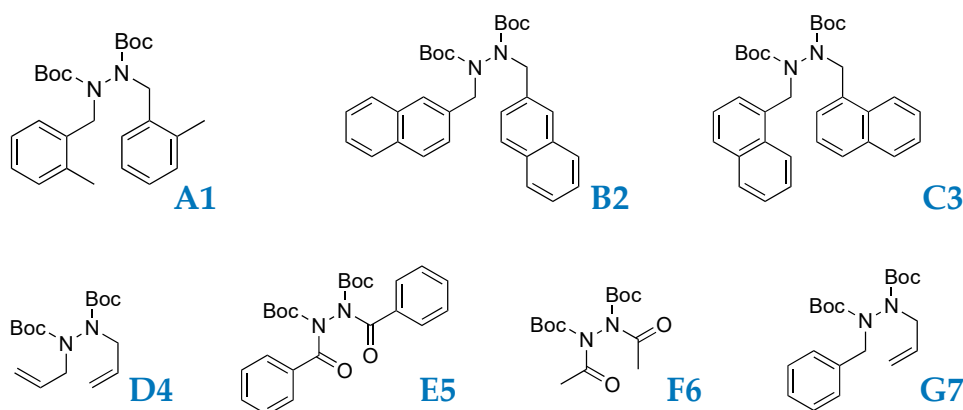

Figure 5. Studied molecules

### Conformational searches and refinement of the ensembles

An initial conformational search was performed for each of the seven hydrazides using the CREST<sup>[8]</sup> software utility (version 2.11.1), which is based on the xTB<sup>[9]</sup> engine (version 6.4.1). The obtained conformational ensembles were further refined with CENSO<sup>[10]</sup> (version 1.2.0). Each one of the seven structures was initially subjected to this conformational searches at 298.15 K at the GFN2-xTB<sup>[11]</sup> level, discarding all conformers with an energy higher than the predefined cutoff values for the energy (6 kcal/mol relative to the lowest-energy conformer) and the root mean square difference of cartesian coordinates (RMSD; 0.125 Å).

Visual inspection of the seven ensembles obtained by CREST algorithm showed that all ensembles contained both axial epimers regardless of the axial configuration of the starting structure.

The results obtained in these conformational searches are reported below.

|    | Number of conformers | % Population of the lowest energy conformer |
|----|----------------------|---------------------------------------------|
| A1 | 93                   | 67.0                                        |
| B2 | 241                  | 22.2                                        |
| C3 | 125                  | 46.9                                        |
| D4 | 71                   | 24.7                                        |
| E5 | 86                   | 30.1                                        |
| F6 | 66                   | 9.8                                         |
| G7 | 115                  | 38.1                                        |

Table S3. Results of the conformational studies performed with CREST at the GFN2-xTB level using the default thresholds.

As can be seen, the high number of conformers obtained for all 7 molecules under investigation is indicative of their high structural flexibility. This observation led to the investigation of the effect of different RMSD thresholds on the population for each substrate. Therefore, for each conformer a second CREST run was carried out using a larger RMSD threshold of 0.250 Å, instead of the default value of 0.125 Å used in the first run. Each conformer of the ensemble obtained with an RMSD of 0.250 Å was compared with all the conformers of the ensemble obtained with an RMSD of 0.125 Å. In case the difference in energy was below 0.05 kcal/mol, the two conformers were considered equivalent. Here below is reported the number of conformers of one ensemble contained in the other and *vice versa* showing that the conformational searches run with either the RMSD threshold at 0.125 Å or at 0.250 Å resulted in almost identically populated ensembles. Also, most of the structures were visually superimposable, thus confirming the data previously gathered.

|    | RMSD<br>Threshold 0.125<br>Å | RMSD<br>Threshold 0.250<br>Å |
|----|------------------------------|------------------------------|
| A1 | 92 out of 93<br>(98.92%)     | 89 out of 92<br>(96.74%)     |
| B2 | 233 out of 241<br>(96.68%)   | 205 out of 208<br>(98.56%)   |
| C3 | 120 out of 125<br>(96.00%)   | 112 out of 117<br>(95.73%)   |
| D4 | 69 out of 71<br>(97.18%)     | 91 out of 124<br>(73.39%)    |
| E5 | 84 out of 86<br>(97.67%)     | 77 out of 80<br>(96.25%)     |
| F6 | 60 out of 66<br>(90.91%)     | 58 out of 59<br>(98.31%)     |
| G7 | 109 out of 115<br>(94.78%)   | 99 out of 112<br>(88.39%)    |

Table S4. Comparison between the ensembles generated using two different RMSD thresholds.

The seven conformer ensembles obtained with CREST in the previous step, were refined to DFT-theory level using CENSO (version 1.2.0) framework interfaced with ORCA<sup>[12]</sup> (version 5.0.1) according to the following protocol:

1. *part0 cheap prescreening*: b97-d3<sup>[13]</sup>/def2-SV(P) // GFN2-xTB (Input geometry)
2. *part1 prescreening*: r<sup>2</sup>scan-3c<sup>[14]</sup>+ C-PCM[hexane] + GmRRHO<sup>[15]</sup>(GFN2[ALPB<sup>[16]</sup>]-bhess<sup>[17]</sup>) // GFN2-xTB (Input geometry)
3. *part2 optimization*: r<sup>2</sup>scan-3c + C-PCM[hexane] + GmRRHO(GFN2[ALPB]-bhess) // r<sup>2</sup>scan-3c[SMD]

Thermochemistry data were obtained at 298.15 K.

The following table shows the CENSO refinement results for the conformer ensembles obtained from CREST, highlighting the pruning that occurred at the three different steps. At each part the conformers are analyzed and those with a relative energy greater than the default (for *part0* 4.0 kcal/mol, *part1* 3.5 kcal/mol and *part2* 2.5 kcal/mol). For the last two parts, the free energy was calculated via the mRRHO approximation. Furthermore, to consider the dispersion of the various

conformers' energy, in part2 a Spearman's correlation coefficient automatically generated was taken into account to smooth the energy threshold.

|    | Input ensemble (CREST) | After part0 | After part1 | After part2 | % Population of lowest conf. |
|----|------------------------|-------------|-------------|-------------|------------------------------|
| A1 | 93                     | 89          | 78          | 48          | 31.5                         |
| B2 | 241                    | 177         | 127         | 96          | 4.5                          |
| C3 | 125                    | 72          | 37          | 31          | 29.4                         |
| D4 | 71                     | 47          | 37          | 30          | 17.0                         |
| E5 | 86                     | 60          | 59          | 51          | 11.2                         |
| F6 | 66                     | 40          | 40          | 35          | 7.5                          |
| G7 | 115                    | 83          | 62          | 50          | 13.1                         |

Table S5. Pruning process of CENSO framework after each part of the process.

Then, for each molecule, the lowest-energy conformer produced by CENSO was optimized using Gaussian 16 (rev. A.03)<sup>[18]</sup> at the DFT level with the chemical model  $\omega$ B97x-D/6-31G(d) and implicit solvation C-PCM in n-hexane. These parameters were chosen after previous works on similar compounds<sup>[19]</sup>. Thermochemical corrections were obtained from frequency calculations at the same level for a state of 1 atm and 298.15 K.

As reported in Table 4, the comparison of several structural parameters showed good consistency between the CENSO energy lowest-lying conformer its Gaussian DFT optimized geometry

|    | A1     |          | B2     |          | C3     |          | D4      |          |
|----|--------|----------|--------|----------|--------|----------|---------|----------|
|    | CENSO  | GAUSSIAN | CENSO  | GAUSSIAN | CENSO  | GAUSSIAN | CENSO   | GAUSSIAN |
| q1 | 2.29   | -0.75    | 4.91   | 9.26     | 0.59   | -1.26    | -8.41   | -10.41   |
| q2 | 2.33   | -0.75    | 4.94   | 8.84     | 0.59   | -1.25    | -8.39   | -10.41   |
| q3 | 83.33  | 77.89    | -67.64 | -61.55   | 81.61  | 77.58    | 63.93   | 62.73    |
| q4 | 75.75  | 80.37    | -83.69 | -91.12   | 79.68  | 81.69    | 91.35   | 96.91    |
| q5 | 177.67 | 179.87   | 173.66 | 171.67   | 177.79 | 179.23   | -171.47 | -171.38  |
| q6 | 177.60 | 179.87   | 174.21 | 171.35   | 177.79 | 179.23   | -171.44 | -171.38  |
| r1 | 5.51   | 5.45     | 5.41   | 5.34     | 5.51   | 5.46     | 5.35    | 5.31     |
| r2 | 3.53   | 3.52     | 3.53   | 3.52     | 3.53   | 3.52     | 3.53    | 3.52     |
| r3 | 3.53   | 3.52     | 3.53   | 3.52     | 3.53   | 3.52     | 3.53    | 3.52     |
| r4 | 1.38   | 1.37     | 1.38   | 1.38     | 1.38   | 1.37     | 1.38    | 1.38     |
| r5 | 1.38   | 1.38     | 1.39   | 1.38     | 1.38   | 1.38     | 1.38    | 1.38     |
| r6 | 1.38   | 1.38     | 1.39   | 1.38     | 1.38   | 1.38     | 1.38    | 1.38     |
| r7 | 1.46   | 1.46     | 1.46   | 1.46     | 1.46   | 1.46     | 1.46    | 1.46     |
| r8 | 1.46   | 1.46     | 1.46   | 1.46     | 1.46   | 1.46     | 1.46    | 1.46     |

|    | E5    |          | F6     |          | G7    |          |
|----|-------|----------|--------|----------|-------|----------|
|    | CENSO | GAUSSIAN | CENSO  | GAUSSIAN | CENSO | GAUSSIAN |
| q1 | 6.50  | 4.35     | 0.43   | 1.48     | -4.76 | -8.31    |
| q2 | -8.18 | -5.82    | 0.39   | 1.48     | -7.80 | -11.52   |
| q3 | 87.87 | 87.70    | -86.43 | -84.12   | 66.05 | 62.11    |
| q4 | 90.74 | 90.27    | -87.79 | -89.03   | 86.56 | 94.64    |

|    |        |        |        |        |         |         |
|----|--------|--------|--------|--------|---------|---------|
| ∅5 | 21.43  | 19.01  | 178.33 | 179.24 | -171.93 | -170.04 |
| ∅6 | -22.86 | -20.29 | 178.37 | 179.24 | -173.26 | -172.92 |
| r1 | 3.44   | 3.43   | 5.43   | 5.41   | 5.37    | 5.32    |
| r2 | 2.68   | 2.67   | 3.52   | 3.51   | 3.53    | 3.52    |
| r3 | 2.66   | 2.65   | 3.52   | 3.51   | 3.53    | 3.52    |
| r4 | 1.38   | 1.37   | 1.39   | 1.38   | 1.34    | 1.38    |
| r5 | 1.42   | 1.40   | 1.41   | 1.41   | 1.38    | 1.38    |
| r6 | 1.42   | 1.40   | 1.41   | 1.41   | 1.38    | 1.38    |
| r7 | 1.41   | 1.41   | 1.42   | 1.42   | 1.46    | 1.41    |
| r8 | 1.42   | 1.42   | 1.42   | 1.42   | 1.46    | 1.42    |

Table S6. Geometrical parameters comparison for the CENSO low-lying conformer and its DFT optimized geometry.

| Geometrical Parameter definition |         |
|----------------------------------|---------|
| ∅1                               | 3-2-5-1 |
| ∅2                               | 4-1-6-2 |
| ∅3                               | 5-1-2-6 |
| ∅4                               | 3-1-2-4 |
| ∅5                               | 1-2-6-8 |
| ∅6                               | 2-1-5-7 |
| r1                               | 7-8     |
| r2                               | 7-2     |
| r3                               | 8-1     |
| r4                               | 1-2     |
| r5                               | 1-5     |
| r6                               | 2-6     |

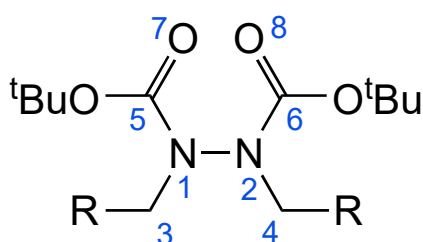

Figure S6. Geometrical parameter definition..

All the DFT optimized structures show nearly perfectly planar  $sp^2$ -hybridized nitrogen atoms, as can be seen from dihedral angles ∅1 and ∅2 in Table 4. In addition, the best conformer for molecules A1, B2, C3, D4 and F6 has an almost perfect C2 symmetry.

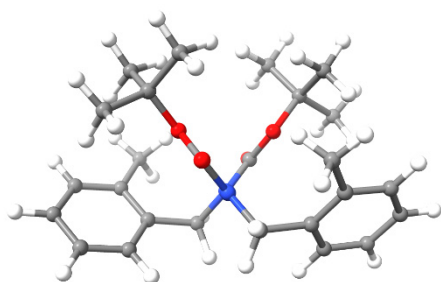

A1

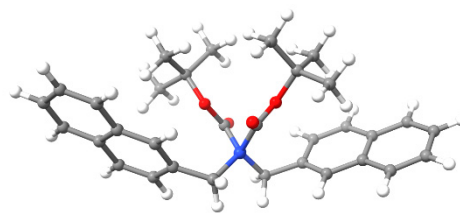

B2

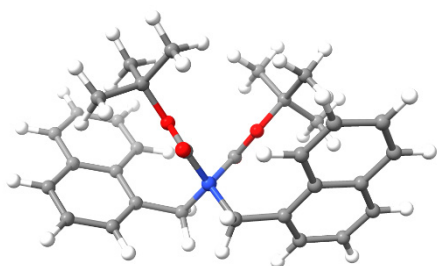

C3

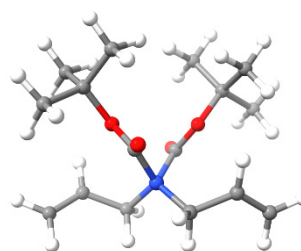

D4

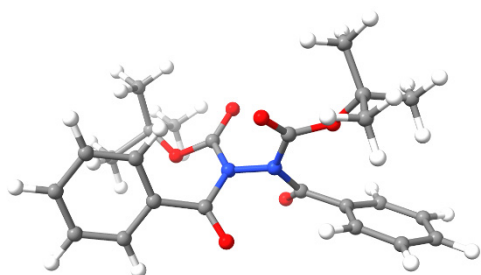

**E5**

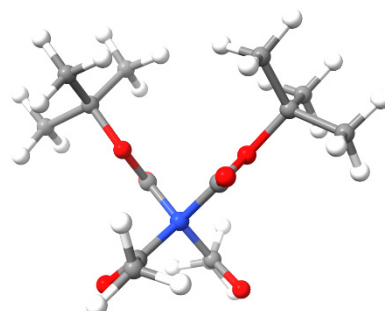

**F6**

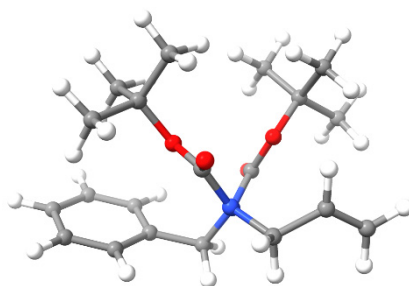

**G7**

*Figure S7. Best conformers geometry.*

Three of these structures (B2, D4 and G7) have a  $\vartheta 3$  dihedral angle around the N—N bond of about  $60^\circ$ , while for the other four structures this angle is closer to the orthogonal arrangement, varying from  $77^\circ$  to about  $88^\circ$ . To accurately describe noncovalent interactions, the NCI index was employed using NCIPLOT<sup>[20]</sup> software. The following color maps encode the type of contribution, blue for attractive, red for repulsive and green for van der Waals interactions.

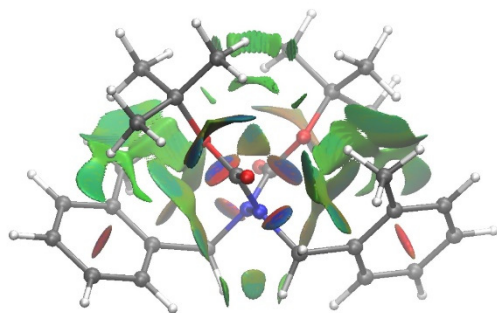

**A1**

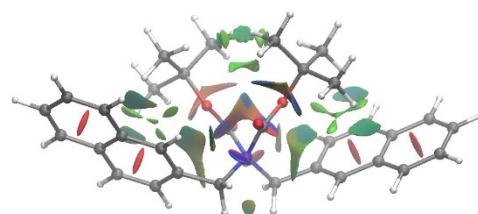

**B2**

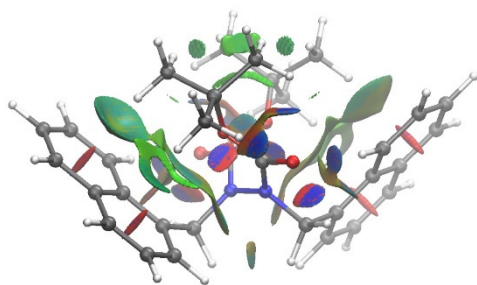

**C3**

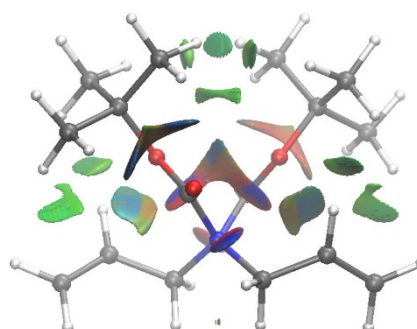

**D4**

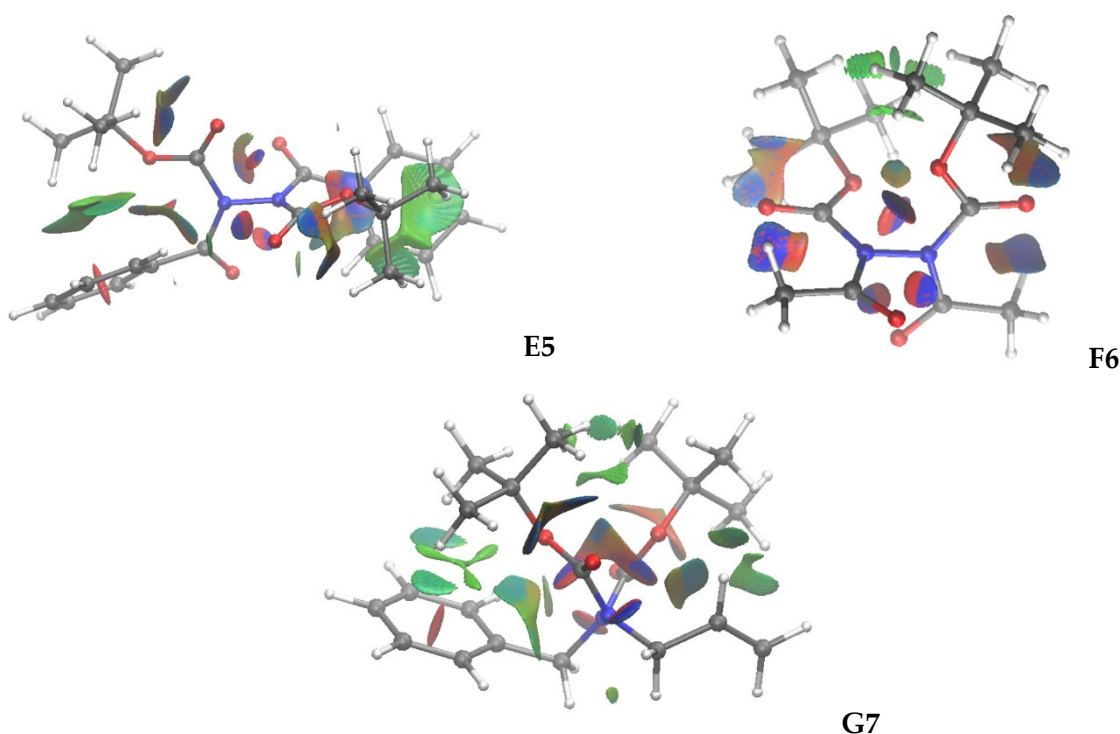

Figure S58. NCI-index surfaces.

As can be seen in Figure 4, these favored conformations appear to be preferred due to two main non-covalent intramolecular interactions: (a) an interaction between one or two methyl protons of one *t*-butyl group with the  $\pi$ -system of an aromatic substituent on the opposite nitrogen atom (when present like in **B2** and **C3**) and (b) the non-covalent interaction between protons of opposite BOC groups (as in **F6**). Another important parameter that is observed in all the molecules but E5 is the relative orientation of the carbonyl groups of the BOCs. This parameter can be confirmed by the distances of those two oxygen atoms ( $r_1$ ) which fluctuates around 5 Å, and by comparing the dihedral angles  $\vartheta_4$  and  $\vartheta_5$ , it's possible to conclude that all these structures are in *s-trans* configuration (regarding the NNCO fragment). The E5 structure represents an exception from these structural parameters, its NNCO fragments are in *s-cis* configuration. These observations are also confirmed by looking at  $r_2$  and  $r_3$  parameters whose convey the distance of the oxygen atom and the further nitrogen atom. In Table 5 dipole momentum of different conformers is listed with the associated  $\Delta G$  that was calculated at the  $\omega$ B97x-D/6-31G(d) DFT-level considering the implicit *n*-hexane solvation with CPCM theory. Structures with both BOC fragments in *s-cis* configuration are noted as *inside*, as opposed to *s-trans* as *outside* (Figure 5). The CREST--CENSO protocol in all cases but E5 afforded as the best conformer one with both the carbonyls in the "outside" disposition. To obtain the structures with the opposite disposition, the previously optimized structures were distorted by a manual 180° rotation of both the  $\vartheta_4$  and  $\vartheta_5$  dihedral angles. These distorted geometries were then optimized at the same level. It is worth of note that all the manually generated geometries show higher energies than the conformations obtained by the CREST-CENSO protocol.



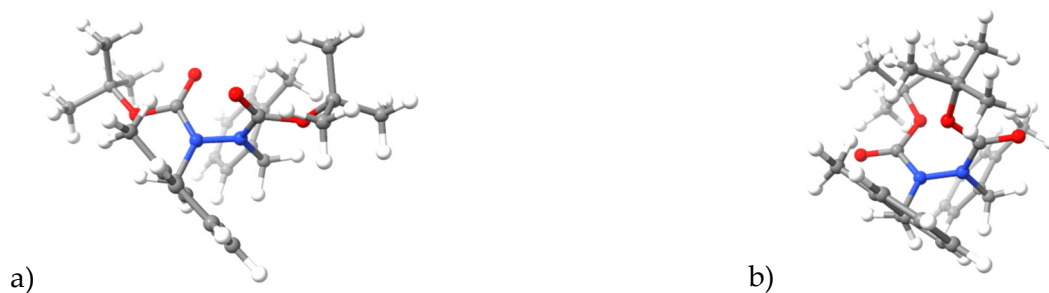

Figure S9. Configuration of BOC fragments: a) inside; b) outside.

| Dipole momentum | Inside | Outside | $\Delta G$ kcal/mol (In-Out) |
|-----------------|--------|---------|------------------------------|
| A1              | 1.9848 | 0.9121  | +5.85                        |
| B2              | 1.5692 | 0.8129  | +8.21                        |
| C3              | 1.9374 | 0.8278  | +8.47                        |
| D4              | 1.5456 | 0.8058  | +3.32                        |
| E5              | 2.1177 | 5.2156  | -1.75                        |
| F6              | 2.7641 | 5.7090  | +3.92                        |
| G7              | 1.7223 | 0.6977  | +5.43                        |

Table S7. Dipole momentum of the optimized structures. Green structures generated from CREST-CENSO protocol. Blue manually generated by manually rotating by  $180^\circ$  the  $\vartheta_4$  and  $\vartheta_5$  dihedral angles of the structures.

From the results shown in Table 5, it is not possible to conclude that all the structures tend to minimize the dipole momentum, in fact for F6 the lowest energy *inside* conformation has the highest dipole momentum. Probably thanks to the gaining in NCIs between methyl groups and carbonyl oxygen atoms (as visible in Figure 4, **F6**). From the visualization of the molecular orbitals of the molecules, it is possible to exclude any type of conjugation between the two nitrogen atoms. HOMO orbitals of all molecules are shown in Figure 3 and most of them are localized on the aromatic system (when present), otherwise it is possible to observe a conjugation of the carbamate system  $[\text{NC}(=\text{O})\text{O}]$ .

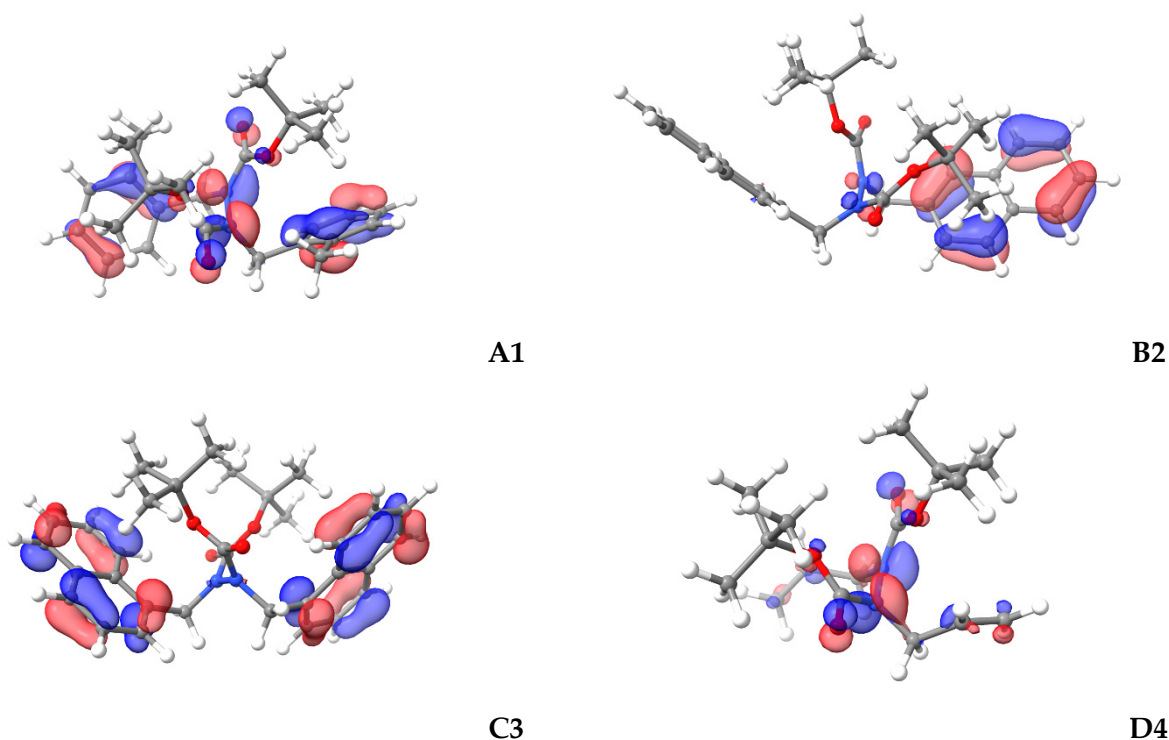

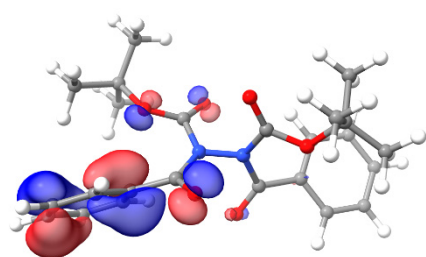

**E5**

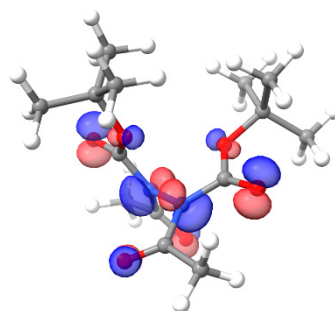

**F6**

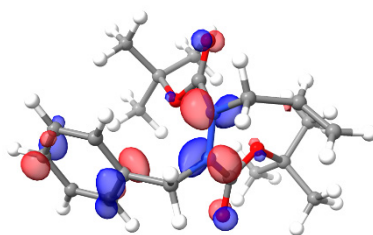

**G7**

Figure S10. HOMO molecular orbitals of each low-lying conformer.

### TS search for the N—N axial epimerization

The following step was the quantification of the rotational barrier around the  $\sigma$  N-N bond. To achieve this, an initial analysis of the PES was performed by a relaxed 360° scan of the  $\vartheta_3$  dihedral (Figure 2) with a 10° step in both clockwise (here noted as **C**) and counterclockwise (**CC**) directions. Each scan allows to obtain two maximum energy geometries that can be used as a good starting guess geometry for the optimization towards the actual transition state (TS) stationary point. To perform these scans in an acceptable time, the DTF-level was lowered to  $\omega$ B97x-D/3-21G. The following figures show the energy plot for both the scan of each molecule:

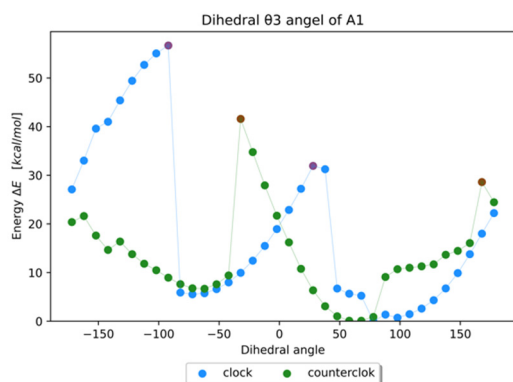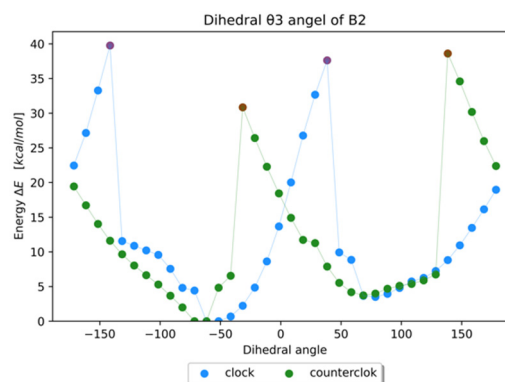



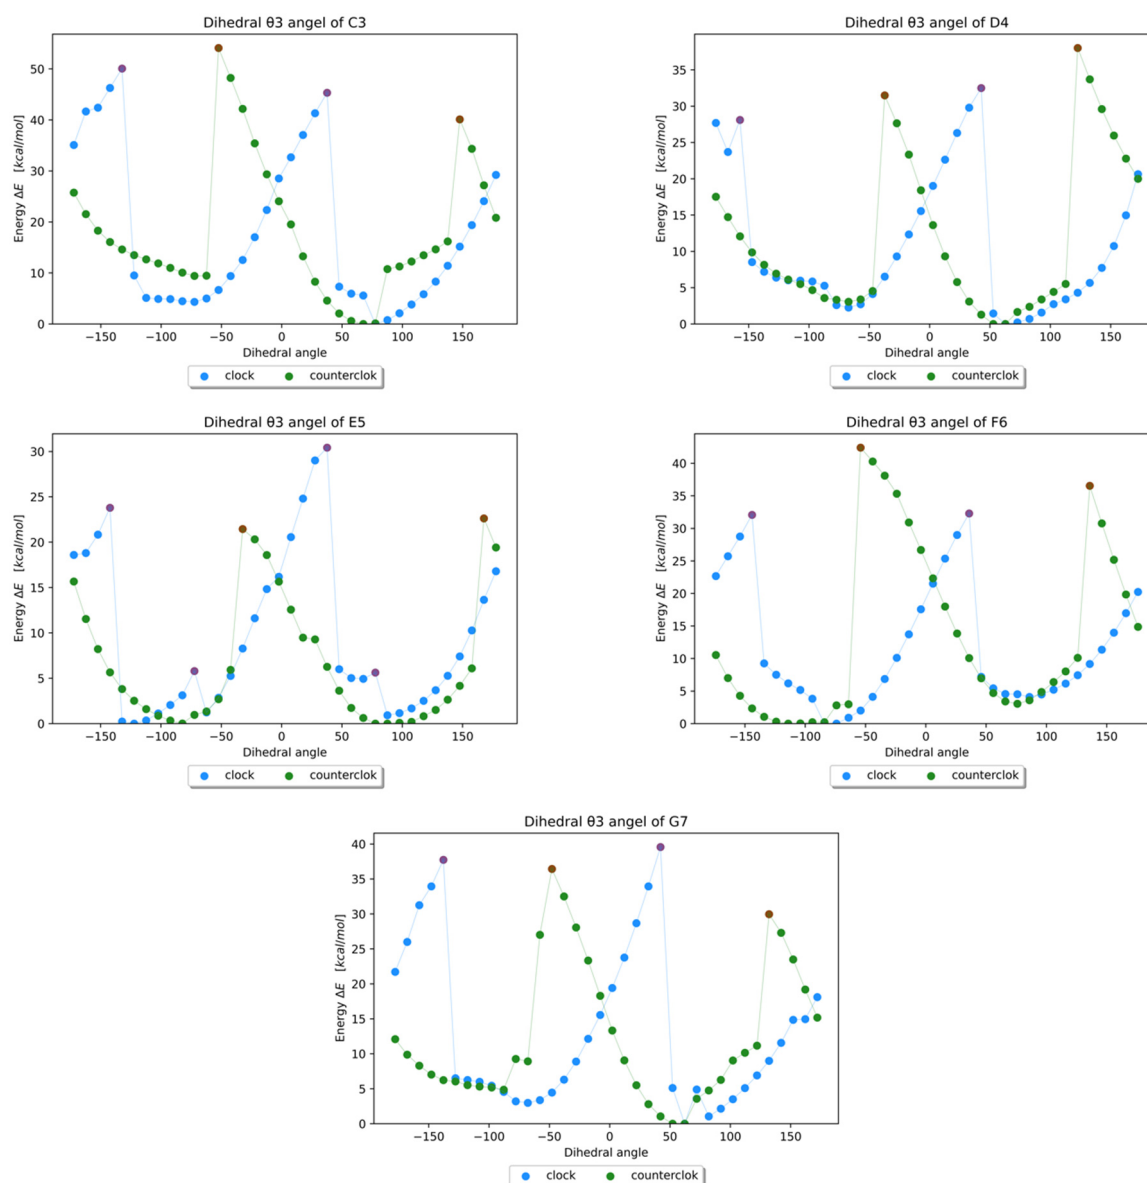

Figure S11. Scans of the dihedral  $\theta_3$  angle.

From each maximum so obtained, an initial optimization had been performed at the  $\omega$ B97x-D/6-31G(d) level keeping the  $\theta_3$  dihedral angle frozen at the initial value. This allows to acquire a conceivably better candidate for the saddle point search algorithm (Berny optimization). After each of these optimizations, a vibrational frequency calculation was performed at the same level of theory to check for the presence of only a single negative normal mode representing the “epimerization” displacement. Unfortunately, with this protocol only a very few structures have been found with the correct negative frequency.

A modified protocol was therefore attempted:

1. Partial optimization of the maximum structure arising from the scan at  $\omega$ B97x-D/3-21G with the  $\theta_3$  dihedral angle frozen and subsequent diagonalization of the hessian matrix.
2. If the sought frequency is present, a constrain-free Berny optimization at  $\omega$ B97x-D/3-21G reading the previously computed force constants is run (*opt=readfc,ts,noeigentest*) with a second hessian calculation.

3. If the frequency is still present, a second Berny optimization at  $\omega$ B97x-D/6-31G(d) again reading the previously calculated force constants with a final hessian calculation.

In the second and third step described above, it became necessary to change the maximum displacement for each cycle of optimization from 0.30 Bohr (the default value) to between 0.05 Bohr and 0.01 Bohr (*maxstep=5* or *maxstep=1*). With some more tedious molecules a second partial optimization when rising the DFT level was crucial to ensure the maintenance of the correct negative normal mode. This workflow allowed to find most of the correct TS structures except those for E5 and F6. For these elusive TS, new guess geometries were obtained using the Growing String Method<sup>[21]</sup> (GSM) coupled with xTB. These guess geometries were then optimized according to the above protocol and all but one of the remaining TS could be located. As it was done for ground potentials structures, the same geometrical parameters are here below reported for all located transition states. TS's with BOC groups by the same side of the  $\sigma$  N-N bond are hereby called *cis*, as opposed to *trans* ones that have BOC groups on opposite sides.

| CIS | A1     |        | B2     |         | C3      |        | D4     |         |
|-----|--------|--------|--------|---------|---------|--------|--------|---------|
|     | C      | CC     | C      | CC      | C       | CC     | C      | CC      |
| Q1  | 28.37  | -31.72 | 29.73  | -21.04  | 36.64   | -20.10 | 37.71  | -16.83  |
| Q2  | 35.29  | -14.39 | 16.00  | -31.08  | 24.62   | -25.20 | 22.18  | -34.56  |
| Q3  | 32.89  | -14.96 | 15.91  | -20.50  | 16.69   | -36.88 | 27.90  | -18.89  |
| Q4  | -67.13 | 59.15  | -56.56 | 62.69   | -81.94  | 38.19  | -67.56 | 65.54   |
| Q5  | 62.60  | 178.77 | 176.47 | -73.30  | -177.87 | -21.27 | 169.49 | -69.22  |
| Q6  | -4.33  | -63.54 | 63.03  | -175.06 | 65.39   | 175.99 | 63.31  | -174.20 |
| r1  | 3.54   | 4.47   | 4.53   | 4.60    | 4.38    | 3.99   | 4.50   | 4.57    |
| r2  | 2.89   | 3.11   | 3.14   | 3.59    | 3.10    | 3.58   | 3.06   | 3.61    |
| r3  | 3.41   | 3.61   | 3.60   | 3.17    | 3.59    | 2.86   | 3.60   | 3.14    |
| r4  | 1.44   | 1.43   | 1.43   | 1.43    | 1.44    | 1.44   | 1.45   | 1.43    |
| r5  | 1.38   | 1.45   | 1.44   | 1.38    | 1.46    | 1.39   | 1.46   | 1.37    |
| r6  | 1.45   | 1.37   | 1.37   | 1.45    | 1.39    | 1.41   | 1.38   | 1.45    |
| r7  | 1.47   | 1.48   | 1.47   | 1.46    | 1.49    | 1.48   | 1.48   | 1.46    |
| r8  | 1.47   | 1.46   | 1.46   | 1.48    | 1.48    | 1.49   | 1.47   | 1.48    |

| CIS | E5     |        | F6     |        | G7     |         |
|-----|--------|--------|--------|--------|--------|---------|
|     | C      | CC     | C      | CC     | C      | CC      |
| Q1  | 25.41  | -22.29 | 27.69  | -25.77 | 17.26  | -18.53  |
| Q2  | 30.43  | -28.86 | 24.93  | -24.11 | 34.65  | -35.54  |
| Q3  | 32.89  | -39.54 | 28.61  | -25.02 | 13.49  | -23.57  |
| Q4  | -56.62 | 47.62  | -54.84 | 57.16  | -68.81 | 63.94   |
| Q5  | 61.83  | 132.05 | 52.46  | 122.03 | 64.98  | -75.51  |
| Q6  | 157.73 | 9.31   | 171.35 | 12.53  | 176.98 | -175.00 |
| r1  | 4.59   | 2.94   | 4.42   | 3.01   | 4.50   | 4.51    |
| r2  | 3.56   | 2.67   | 3.57   | 2.72   | 3.61   | 3.60    |
| r3  | 3.06   | 3.43   | 3.02   | 3.41   | 3.12   | 3.10    |
| r4  | 1.42   | 1.43   | 1.42   | 1.42   | 1.43   | 1.44    |
| r5  | 1.40   | 1.40   | 1.39   | 1.39   | 1.37   | 1.38    |
| r6  | 1.47   | 1.47   | 1.46   | 1.46   | 1.45   | 1.46    |
| r7  | 1.46   | 1.47   | 1.49   | 1.48   | 1.47   | 1.46    |

|    |      |      |      |      |      |      |
|----|------|------|------|------|------|------|
| r8 | 1.42 | 1.41 | 1.40 | 1.40 | 1.48 | 1.42 |
|----|------|------|------|------|------|------|

| TRANS | A1      |         | B2      |         | C3      |         | D4      |         |
|-------|---------|---------|---------|---------|---------|---------|---------|---------|
|       | C       | CC      | C       | CC      | C       | CC      | C       | CC      |
| ϑ1    | -13.13  | 20.71   | -21.33  | 29.34   | 35.49   | 23.38   | 23.46   | 23.46   |
| ϑ2    | 22.91   | -29.53  | 28.85   | -30.50  | -20.30  | -32.94  | -34.37  | -34.37  |
| ϑ3    | -152.26 | -173.62 | -161.50 | -168.35 | 170.61  | 160.85  | -177.37 | -177.37 |
| ϑ4    | -173.32 | -161.53 | -177.87 | -166.94 | 144.39  | -176.39 | -158.83 | -158.83 |
| ϑ5    | 14.61   | 162.93  | -166.00 | -14.41  | -179.60 | 105.76  | 158.85  | 11.77   |
| ϑ6    | -179.86 | -1.71   | 13.97   | 177.06  | 39.47   | 169.34  | 170.40  | -172.14 |
| r1    | 4.70    | 4.87    | 5.11    | 5.03    | 4.99    | 5.40    | 5.74    | 5.75    |
| r2    | 3.60    | 2.73    | 2.90    | 3.54    | 2.82    | 3.62    | 3.57    | 3.57    |
| r3    | 3.49    | 3.55    | 3.52    | 2.82    | 3.55    | 3.19    | 3.53    | 3.53    |
| r4    | 1.43    | 1.44    | 1.44    | 1.44    | 1.44    | 1.46    | 1.45    | 1.44    |
| r5    | 1.39    | 1.38    | 1.41    | 1.38    | 1.38    | 1.44    | 1.40    | 1.39    |
| r6    | 1.41    | 1.40    | 1.41    | 1.42    | 1.47    | 1.39    | 1.40    | 1.43    |
| r7    | 1.48    | 1.47    | 1.47    | 1.49    | 1.49    | 1.48    | 1.48    | 1.49    |
| r8    | 1.48    | 1.50    | 1.49    | 1.49    | 1.47    | 1.49    | 1.50    | 1.48    |

| TRANS | E5      |         | F6      |             | G7      |         |
|-------|---------|---------|---------|-------------|---------|---------|
|       | C       | CC      | C       | CC          | C       | CC      |
| ϑ1    | -25.12  | -25.68  | -31.56  | <i>N.F.</i> | -25.83  | -31.60  |
| ϑ2    | 28.25   | 23.63   | 24.53   | <i>N.F.</i> | 24.48   | 19.85   |
| ϑ3    | 169.33  | 179.27  | -166.89 | <i>N.F.</i> | -168.33 | -176.93 |
| ϑ4    | 166.89  | -175.74 | -174.11 | <i>N.F.</i> | -168.21 | -160.46 |
| ϑ5    | -129.29 | 172.15  | -179.69 | <i>N.F.</i> | 179.10  | -2.07   |
| ϑ6    | -40.38  | 14.21   | -8.82   | <i>N.F.</i> | 169.96  | 169.36  |
| r1    | 4.72    | 4.80    | 4.75    | <i>N.F.</i> | 5.79    | 4.88    |
| r2    | 2.73    | 2.66    | 2.62    | <i>N.F.</i> | 3.58    | 3.57    |
| r3    | 3.43    | 3.56    | 3.56    | <i>N.F.</i> | 3.56    | 2.74    |
| r4    | 1.42    | 1.43    | 1.43    | <i>N.F.</i> | 1.44    | 1.44    |
| r5    | 1.40    | 1.46    | 1.41    | <i>N.F.</i> | 1.41    | 1.41    |
| r6    | 1.40    | 1.47    | 1.40    | <i>N.F.</i> | 1.39    | 1.40    |
| r7    | 1.40    | 1.48    | 1.49    | <i>N.F.</i> | 1.48    | 1.40    |
| r8    | 1.41    | 1.48    | 1.48    | <i>N.F.</i> | 1.48    | 1.41    |

Table S8. Geometrical parameters of obtained TSs. *N.F.*: not found.

From these parameters, a constant trend in the spacing of the carbonyl oxygen atoms (r1) of 4-5 Å is observed, except for some *cis* geometries of A1, E5 and F6. Similarly, there are N-N bond distances (r4) around 1.4 Å, slightly longer than the bonds in the minimal structures. Both nitrogen atoms also show strong opposite pyramidalization, as shown by dihedral angles ϑ1 and ϑ2. Compared with equilibrium structures, TS geometries exhibit a mixed *s-cis* and *s-trans* configuration for BOC fragments, evidenced by ϑ5 and ϑ6.

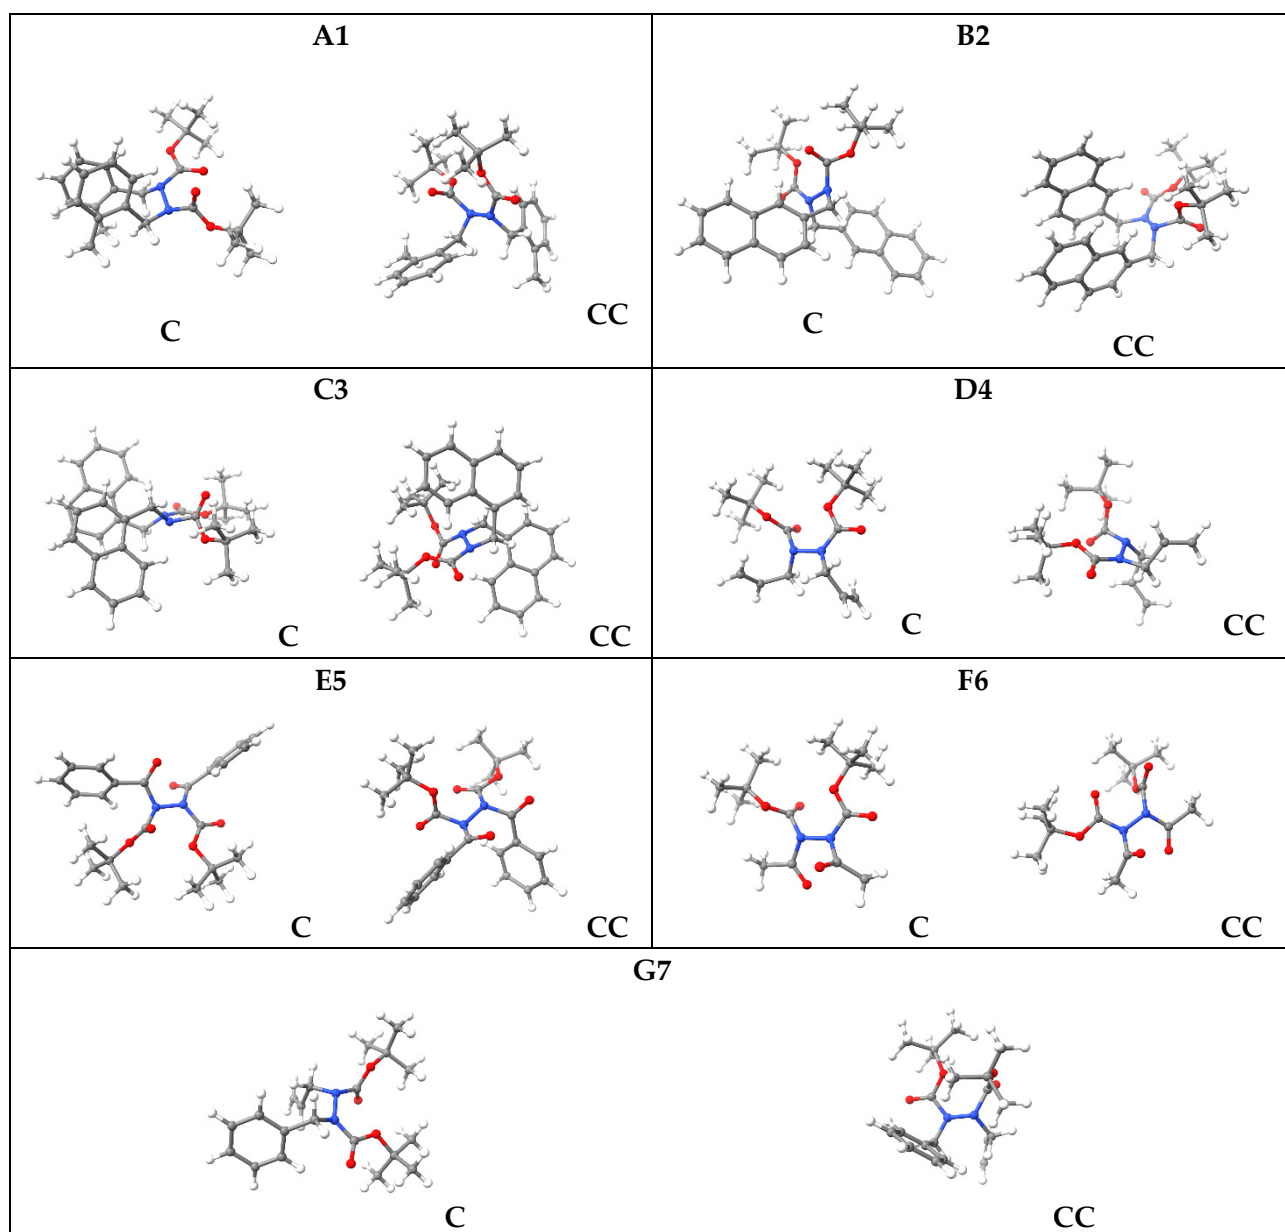

Figure S12. Cis TS geometries.

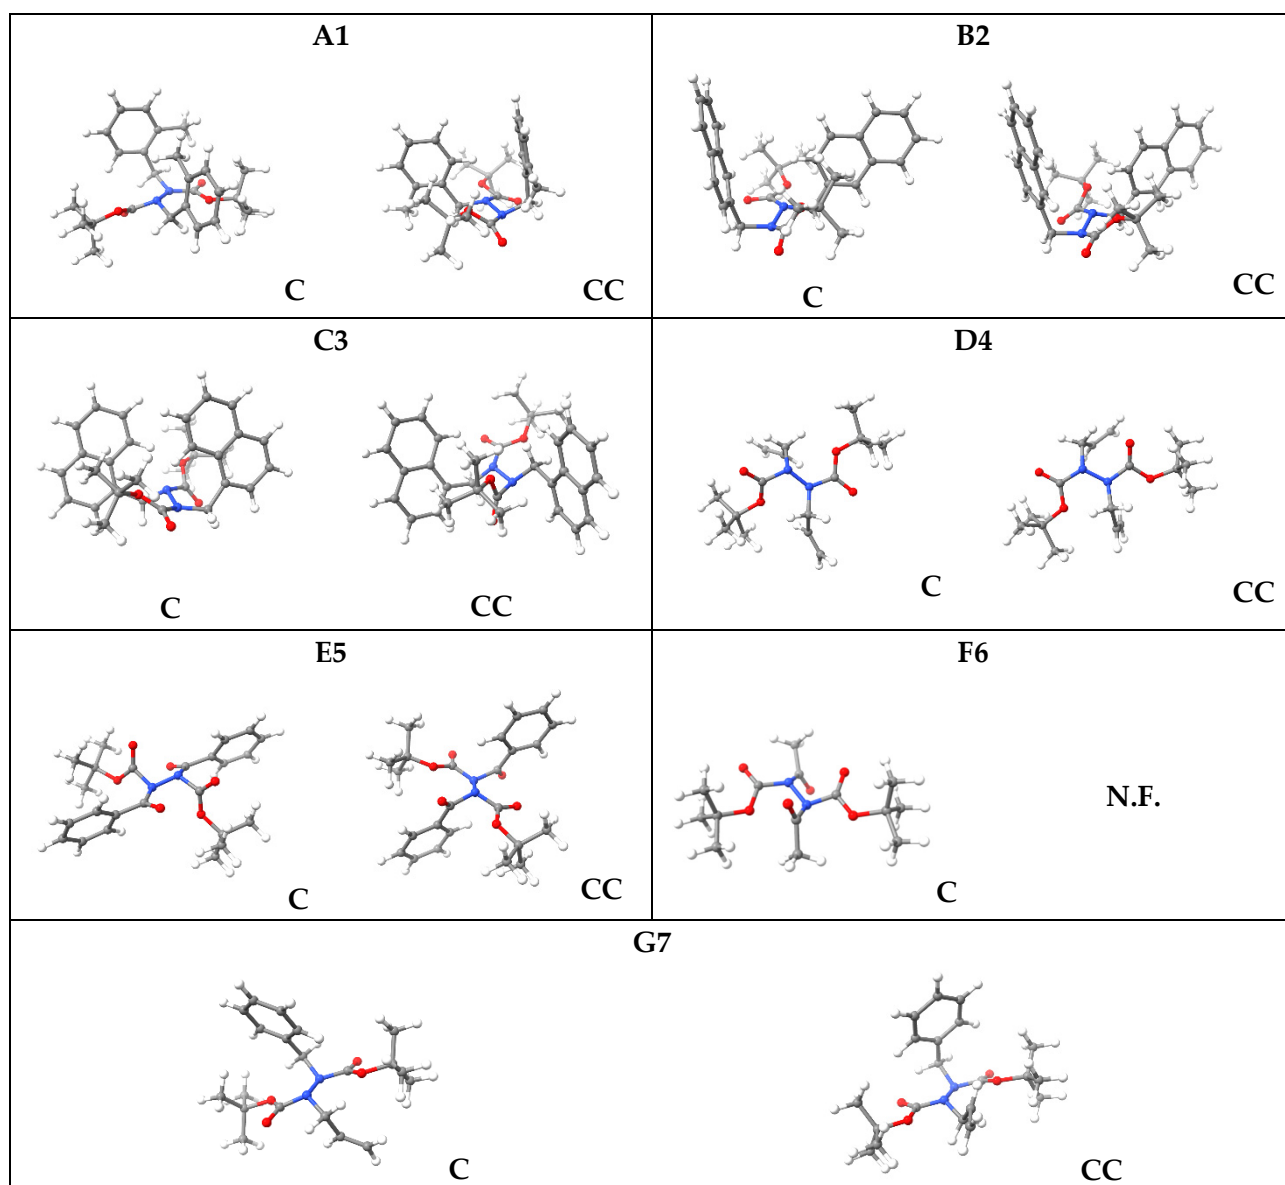

Figure S13. *Trans* TS geometries. N.F.: not found.

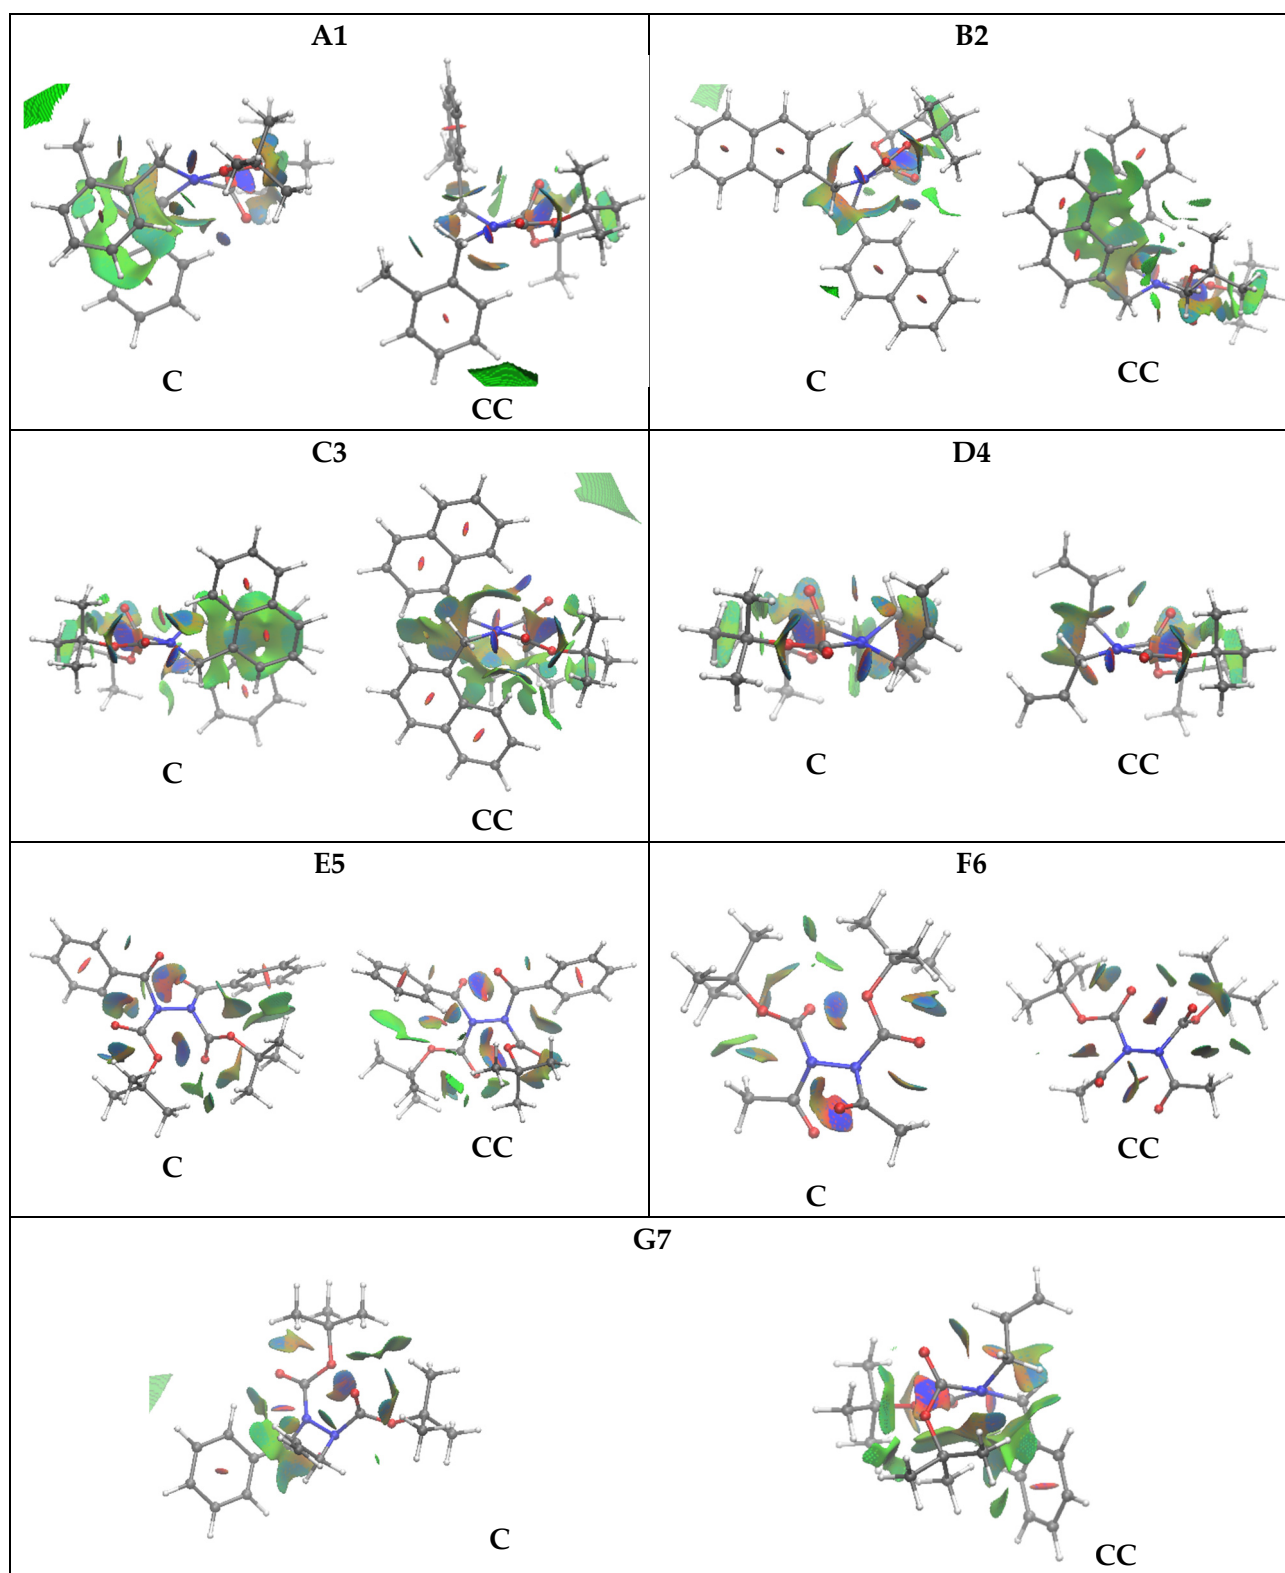

Figure S14. NCI-index of *cis* TSs.

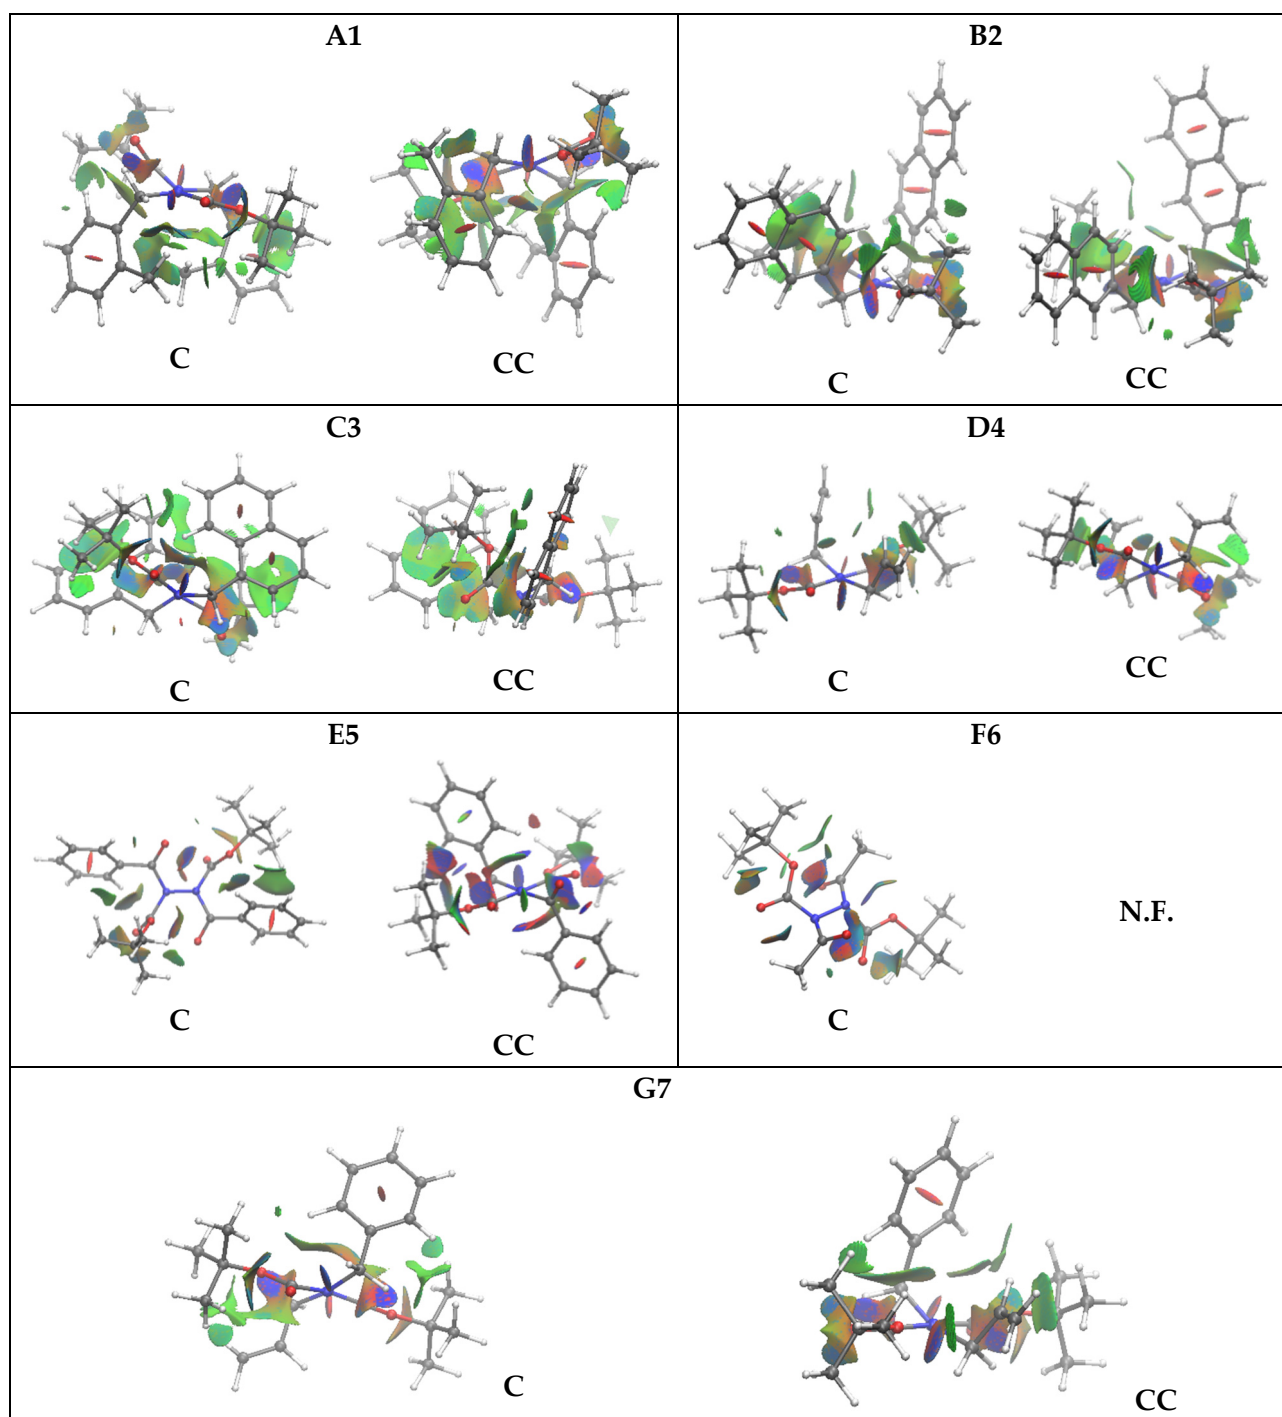

Figure S15. NCI-index of *trans* TSs.

From NCI surface analysis is possible to observe some important interactions: (i)  $\pi$ - $\pi$  stacking between aromatic systems (for example in *cis*-**B2-CC**); (ii) methyl groups pointing towards a  $\pi$  system (as in *trans*-**C3-C**); (iii) carbonyl oxygen atoms interacting with hydrogen of opposite  $\text{CH}_2$  groups (as can be seen in both *trans*-**G7** structures), (iv) the carbonyl oxygen of the BOCs can also give hydrogen bonds on its own *tert*-butyl (as for *cis*-**F6-c** TS), as shown by the blue attractive and weakly red repulsive zones between the oxygen and the carbons.



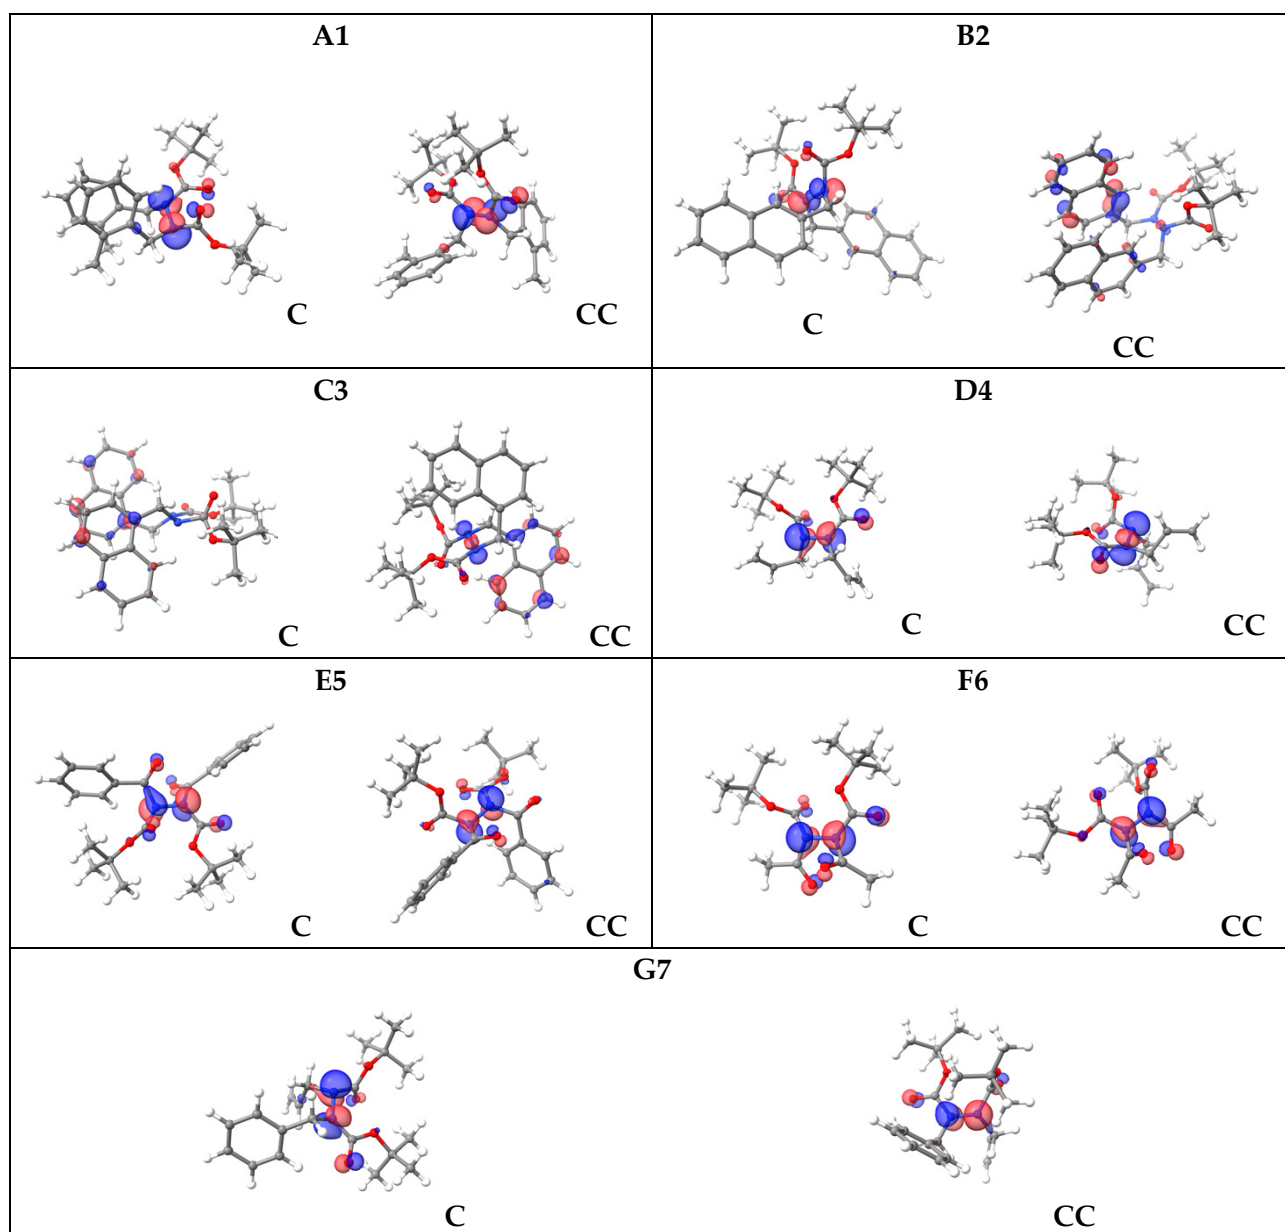

Figure S16. HOMO orbital cis TSs.



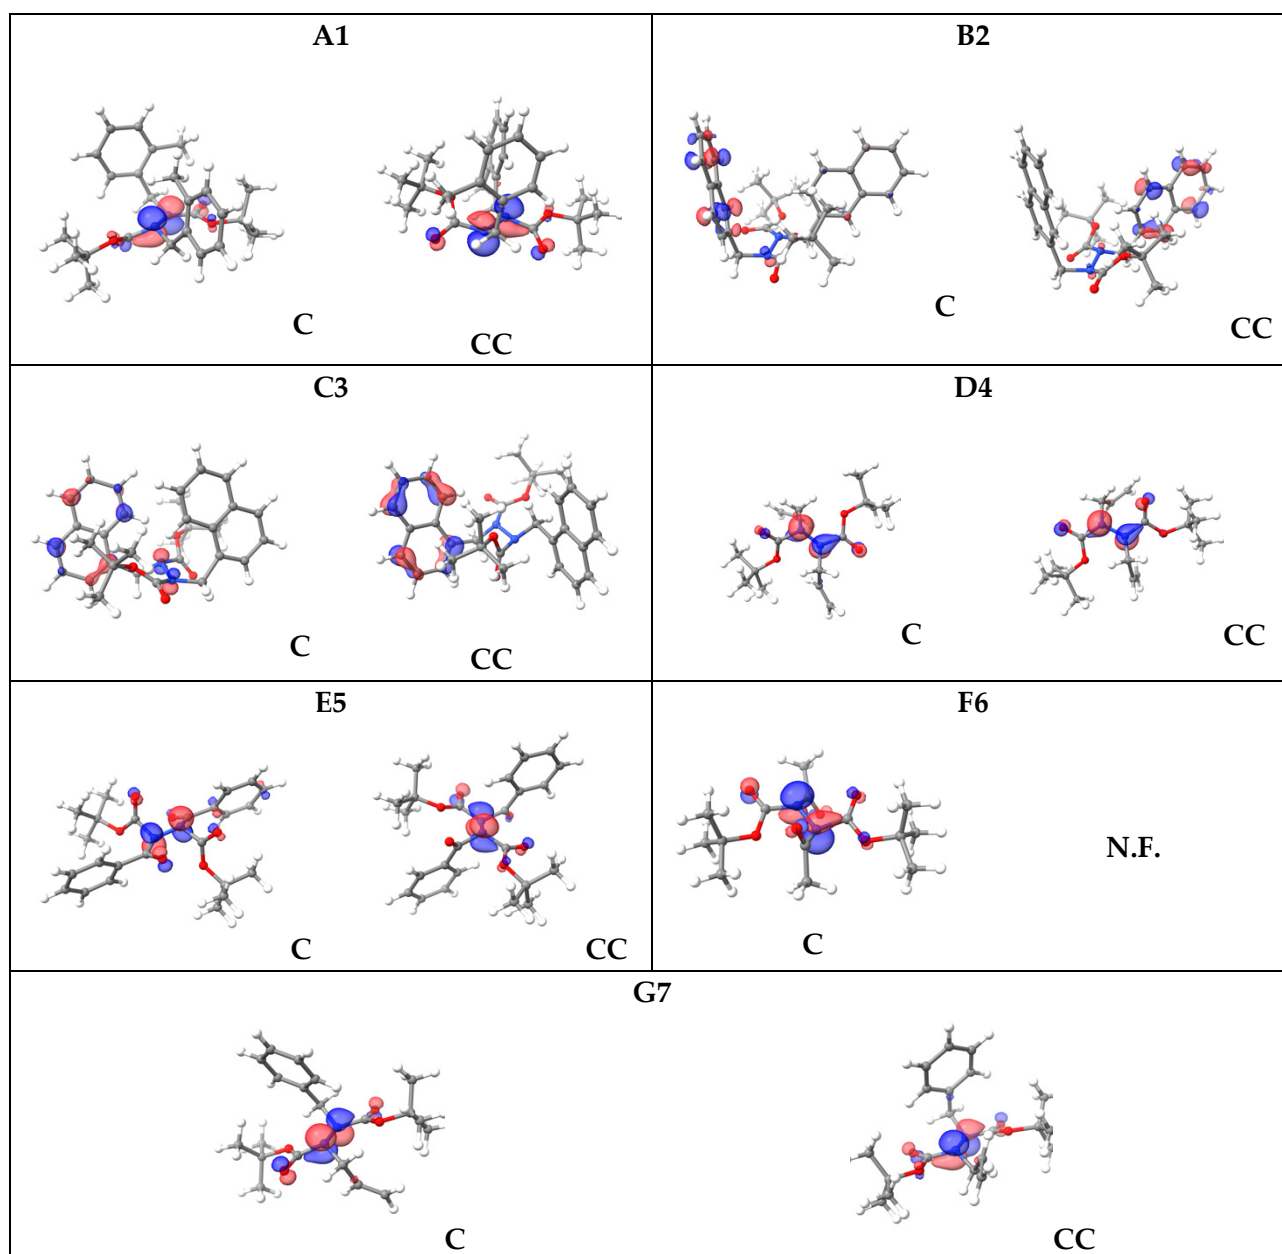

*Figure S17. HOMO orbital trans TSs.*

It can be seen from that the HOMO orbitals are located on the  $\pi$  system as in the case of A1, B2, and C3 structures. For the TSs of the other structures, these orbitals are centered on the carbonyls of the BOCs or on the two substituent groups and on the N-C bond as for F6 and D4. It is possible to observe a significant decrease in NCO conjugation probably due to the strong opposite pyramidalization of both nitrogen atoms. Normal mode vibrational analysis on the stationary points allowed to confirm minima (zero imaginary frequencies) or transition structures (TSs, one imaginary frequency). Zero-point energy, enthalpy and free energy corrections were obtained with a state of 1 atm pressure and 298.15 K temperature using Goodvibes<sup>[22]</sup> (version 3.2), with Grimme's quasiharmonic oscillator approximation at 298.15 K, with a frequency cut-off value of 100 cm<sup>-1</sup>.<sup>[15]</sup> In the following tables, GP1 and GP2 names will describe respectively the favored conformer (from CREST+CENSO protocol) and the conformer of the enantiomer derived from the scan.

| Clock      |            |            |              |              | Counterclock |            |            |              |
|------------|------------|------------|--------------|--------------|--------------|------------|------------|--------------|
| $\Delta E$ | $\Delta H$ | $\Delta G$ | Im.<br>Freq. | <i>A1</i>    | $\Delta E$   | $\Delta H$ | $\Delta G$ | Im.<br>Freq. |
| 0.00       | 0.00       | 0.00       | --           | <i>GP1</i>   | 0.00         | 0.00       | 0.00       | --           |
| 7.31       | 7.24       | 6.15       | --           | <i>GP2</i>   | 7.66         | 7.73       | 6.70       | --           |
| 34.05      | 34.08      | 35.70      | -18.28       | <i>Trans</i> | 31.39        | 30.76      | 31.66      | -22.38       |
| 36.67      | 35.51      | 36.37      | -43.38       | <i>Cis</i>   | 42.00        | 41.31      | 41.88      | -43.38       |

  

| Clock      |            |            |              |              | Counterclock |            |            |              |
|------------|------------|------------|--------------|--------------|--------------|------------|------------|--------------|
| $\Delta E$ | $\Delta H$ | $\Delta G$ | Im.<br>Freq. | <i>B2</i>    | $\Delta E$   | $\Delta H$ | $\Delta G$ | Im.<br>Freq. |
| 0.00       | 0.00       | 0.00       | --           | <i>GP1</i>   | 0.00         | 0.00       | 0.00       | --           |
| 1.57       | 1.28       | 1.32       | --           | <i>GP2</i>   | 1.57         | 1.28       | 1.32       | --           |
| 28.01      | 27.42      | 29.24      | -12.73       | <i>Trans</i> | 29.37        | 28.71      | 29.81      | -17.05       |
| 37.91      | 37.01      | 37.68      | -39.72       | <i>Cis</i>   | 33.50        | 32.21      | 33.63      | -39.72       |

  

| Clock      |            |            |              |              | Counterclock |            |            |              |
|------------|------------|------------|--------------|--------------|--------------|------------|------------|--------------|
| $\Delta E$ | $\Delta H$ | $\Delta G$ | Im.<br>Freq. | <i>C3</i>    | $\Delta E$   | $\Delta H$ | $\Delta G$ | Im.<br>Freq. |
| 0.00       | 0.00       | 0.00       | --           | <i>GP1</i>   | 0.00         | 0.00       | 0.00       | --           |
| 2.28       | 2.09       | 1.43       | --           | <i>GP2</i>   | 8.28         | 8.06       | 7.08       | --           |
| 37.79      | 36.85      | 38.02      | -7.17        | <i>Trans</i> | 40.36        | 39.40      | 39.83      | -20.25       |
| 43.20      | 41.86      | 42.25      | -32.57       | <i>Cis</i>   | 45.78        | 45.27      | 47.09      | -32.57       |

  

| Clock      |            |            |              |              | Counterclock |            |            |              |
|------------|------------|------------|--------------|--------------|--------------|------------|------------|--------------|
| $\Delta E$ | $\Delta H$ | $\Delta G$ | Im.<br>Freq. | <i>D4</i>    | $\Delta E$   | $\Delta H$ | $\Delta G$ | Im.<br>Freq. |
| 0.00       | 0.00       | 0.00       | --           | <i>GP1</i>   | 0.00         | 0.00       | 0.00       | --           |
| 2.61       | 2.21       | 1.87       | --           | <i>GP2</i>   | 2.90         | 2.73       | 1.83       | --           |
| 31.03      | 30.26      | 31.40      | -40.72       | <i>Trans</i> | 27.48        | 26.52      | 27.60      | -25.76       |
| 32.86      | 31.93      | 33.82      | -37.83       | <i>Cis</i>   | 31.79        | 30.80      | 32.07      | -37.83       |

  

| Clock      |            |            |              |              | Counterclock |            |            |              |
|------------|------------|------------|--------------|--------------|--------------|------------|------------|--------------|
| $\Delta E$ | $\Delta H$ | $\Delta G$ | Im.<br>Freq. | <i>E5</i>    | $\Delta E$   | $\Delta H$ | $\Delta G$ | Im.<br>Freq. |
| 0.00       | 0.00       | 0.00       | --           | <i>GP1</i>   | 0.00         | 0.00       | 0.00       | --           |
| 2.68       | 2.55       | 2.65       | --           | <i>GP2</i>   | 1.00         | 0.87       | 0.49       | --           |
| 24.07      | 23.01      | 24.36      | -18.92       | <i>Trans</i> | 26.11        | 24.89      | 25.93      | -18.14       |
| 27.91      | 26.82      | 28.32      | -25.83       | <i>Cis</i>   | 25.31        | 24.13      | 24.94      | -25.83       |

  

| Clock      |            |            |              |              | Counterclock |             |             |              |
|------------|------------|------------|--------------|--------------|--------------|-------------|-------------|--------------|
| $\Delta E$ | $\Delta H$ | $\Delta G$ | Im.<br>Freq. | <i>F6</i>    | $\Delta E$   | $\Delta H$  | $\Delta G$  | Im.<br>Freq. |
| 0.00       | 0.00       | 0.00       | --           | <i>GP1</i>   | 0.00         | 0.00        | 0.00        | --           |
| 5.98       | 5.90       | 5.72       | --           | <i>GP2</i>   | 6.72         | 6.33        | 6.20        | --           |
| 30.33      | 29.04      | 30.10      | -14.99       | <i>Trans</i> | <i>N.F.</i>  | <i>N.F.</i> | <i>N.F.</i> | <i>N.F.</i>  |
| 32.28      | 31.30      | 32.71      | 32.28        | <i>Cis</i>   | 27.30        | 26.06       | 26.82       | -40.9        |

| Clock      |            |            |              |              | Counterclock |            |            |              |
|------------|------------|------------|--------------|--------------|--------------|------------|------------|--------------|
| $\Delta E$ | $\Delta H$ | $\Delta G$ | Im.<br>Freq. | <i>G7</i>    | $\Delta E$   | $\Delta H$ | $\Delta G$ | Im.<br>Freq. |
| 0.00       | 0.00       | 0.00       | --           | <i>GP1</i>   | 0.00         | 0.00       | 0.00       | --           |
| 3.25       | 3.17       | 2.34       | --           | <i>GP2</i>   | 3.83         | 3.76       | 3.22       | --           |
| 30.07      | 29.51      | 30.95      | -24.61       | <i>Trans</i> | 28.99        | 28.42      | 29.87      | -24.36       |
| 34.70      | 33.67      | 34.62      | -52.57       | <i>Cis</i>   | 30.32        | 29.44      | 31.35      | -52.57       |

Table S9. Energy results. All energies are in kcal/mol.

Table 8 summarizes all the minor energy values for the molecular rotational barrier at 298.15K and 1atm.

|           | $\Delta E$ | $\Delta H$ | $\Delta G$ | Im.<br>Freq. |
|-----------|------------|------------|------------|--------------|
| <b>A1</b> |            |            |            |              |
| GP1       | 0.00       | 0.00       | 0.00       | --           |
| GP2       | 7.31       | 7.24       | 6.15       | --           |
| Trans     | 31.39      | 30.76      | 31.66      | -22.38       |
| Cis       | 36.67      | 35.51      | 36.37      | -43.38       |
| <b>B2</b> |            |            |            |              |
| GP1       | 0.00       | 0.00       | 0.00       | --           |
| GP2       | 1.57       | 1.28       | 1.32       | --           |
| Trans     | 28.01      | 27.42      | 29.24      | -12.73       |
| Cis       | 33.50      | 32.21      | 33.63      | -39.72       |
| <b>C3</b> |            |            |            |              |
| GP1       | 0.00       | 0.00       | 0.00       | --           |
| GP2       | 2.28       | 2.09       | 1.43       | --           |
| Trans     | 37.79      | 36.85      | 38.02      | -7.17        |
| Cis       | 43.20      | 41.86      | 42.25      | -32.57       |
| <b>D4</b> |            |            |            |              |
| GP1       | 0.00       | 0.00       | 0.00       | --           |
| GP2       | 2.90       | 2.73       | 1.83       | --           |
| Trans     | 27.48      | 26.52      | 27.60      | -25.76       |
| Cis       | 31.79      | 30.80      | 32.07      | -37.83       |
| <b>E5</b> |            |            |            |              |
| GP1       | 0.00       | 0.00       | 0.00       | --           |
| GP2       | 1.00       | 0.87       | 0.49       | --           |
| Trans     | 24.07      | 23.01      | 24.36      | -18.92       |
| Cis       | 25.31      | 24.13      | 24.94      | -25.83       |
| <b>F6</b> |            |            |            |              |
| GP1       | 0.00       | 0.00       | 0.00       | --           |
| GP2       | 5.98       | 5.90       | 5.72       | --           |
| Trans     | 30.33      | 29.04      | 30.10      | -14.99       |
| Cis       | 27.30      | 26.06      | 26.82      | -40.9        |
| <b>G7</b> |            |            |            |              |
| GP1       | 0.00       | 0.00       | 0.00       | --           |
| GP2       | 3.25       | 3.17       | 2.34       | --           |
| Trans     | 28.99      | 28.42      | 29.87      | -24.36       |
| Cis       | 30.32      | 29.44      | 31.35      | -52.57       |

Table S10. Summary table of the lowest barrier for each molecule. N.A.: not available.

As can be seen from the values above, the TS that determined the barrier is always the trans TS, as it has the lower energy value between the two TSs. To further improve the agreement of the

computational values for the racemization barrier with the experimental ones, the electronic energies of only GP1 and trans geometries for each molecule have been refined. As suggested by Goodman<sup>[23]</sup>, this was conducted by modifying the functional and the basis set to the M06-2X/def2-TZVP level and performing a vertical energy calculation, but using the thermochemical correction previously obtained. Results are summarized in Table 9. To compare the computational data with the experimental data, all the computed  $\Delta G$  of enantiomerization are recalculated to match the experimental temperature used for the kinetic experiments.

| Molecule | $\Delta G$ exp<br>[kcal/mol] | T exp<br>[°C] | $\Delta G$ computational<br>[kcal/mol] | Deviation from<br>experimental value<br>[%] |
|----------|------------------------------|---------------|----------------------------------------|---------------------------------------------|
| A1       | < 24.3                       | 70            | 29.23                                  | 20.29 <sup>[a]</sup>                        |
| B2       | 25.09                        | 71            | 26.31                                  | 4.87                                        |
| C3       | 26.01                        | 71            | 36.23                                  | 39.29                                       |
| D4       | 25.57                        | 70            | 24.81                                  | -2.96                                       |
| E5       | 20.61                        | 25            | 22.57                                  | 9.52                                        |
| F6       | 23.10                        | 40            | 28.46                                  | 23.20                                       |
| G7       | N.A.                         |               | 26.87 <sup>[b]</sup>                   | N.A.                                        |

Table S11. Single-Point refined rotational  $\Delta G$  at M06-2x/def2-TZVP// $\omega$ B97x-D/6-31g(d) level. N.A.: not available. [a]: considering experimental  $\Delta G=24.3$  kcal/mol; [b]: calculated at 298.15 K.

For most of the structures a good agreement with the experimental data was obtained. The deviation for the calculated epimerization barrier for the experimental value turned out to be particularly high for C3. Therefore, to locate a lower lying TS, a conformational search was performed on the calculated TS of C3. This study was conducted through CREST by imposing a force constant on the 6 atoms close to the stereogenic axis (the two nitrogen atoms and the four atoms bound to them) equal to 0.25 Bohr/ $\text{\AA}^2$  during the optimizations and excluding them from the meta-dynamics to generate the conformers' generation. The best conformer has then been used as the guess structure for the TS algorithm following the previously described protocol. The new TS geometry lowered the rotational  $\Delta G$  to 36.09 kcal/mol at 298.15K. <sup>[8],[24],[25]</sup>

### DIM Analysis

To study the energetic contributions to the TSs energy an analysis was carried out employing the distortion-interaction model (DIM)<sup>[26],[27]</sup>. This was accomplished by dividing the molecule in 5 sections: the two BOC residues, the two substituent groups and the N-N fragment (Figure 14).

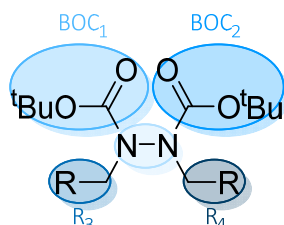

Figure S18. Fragmentation of the molecule for DIM analysis.

For each fragment, the distortion energy ( $E_d^i$ ) was calculated as the difference of the energy of the segment at its TS geometry ( $E_{TS_i}^*$ ) and at its GP1 geometry ( $E_{GP_i}$ ). Then, the **interaction energy** ( $E_i$ )

was obtained by the difference between the single point energy of the whole TS and the sum of all distortion energies.

$$E_d^i = E_{TS_i}^* - E_{GP_i}$$

$$E_i = E_{TS} - \sum^{\text{fragment}} E_d^i$$

The fragments were cut manually and then a dummy atom was used to cover the free valence.

|    |       | Clock                                    | Counterclock                               |
|----|-------|------------------------------------------|--------------------------------------------|
| A1 | Cis   | <p>DIM Analysis TS cis clock for A</p>   | <p>DIM Analysis TS cis counter for A</p>   |
|    | Trans | <p>DIM Analysis TS trans clock for A</p> | <p>DIM Analysis TS trans counter for A</p> |
| B2 | Cis   | <p>DIM Analysis TS cis clock for B</p>   | <p>DIM Analysis TS cis counter for B</p>   |
|    | Trans | <p>DIM Analysis TS trans clock for B</p> | <p>DIM Analysis TS trans counter for B</p> |

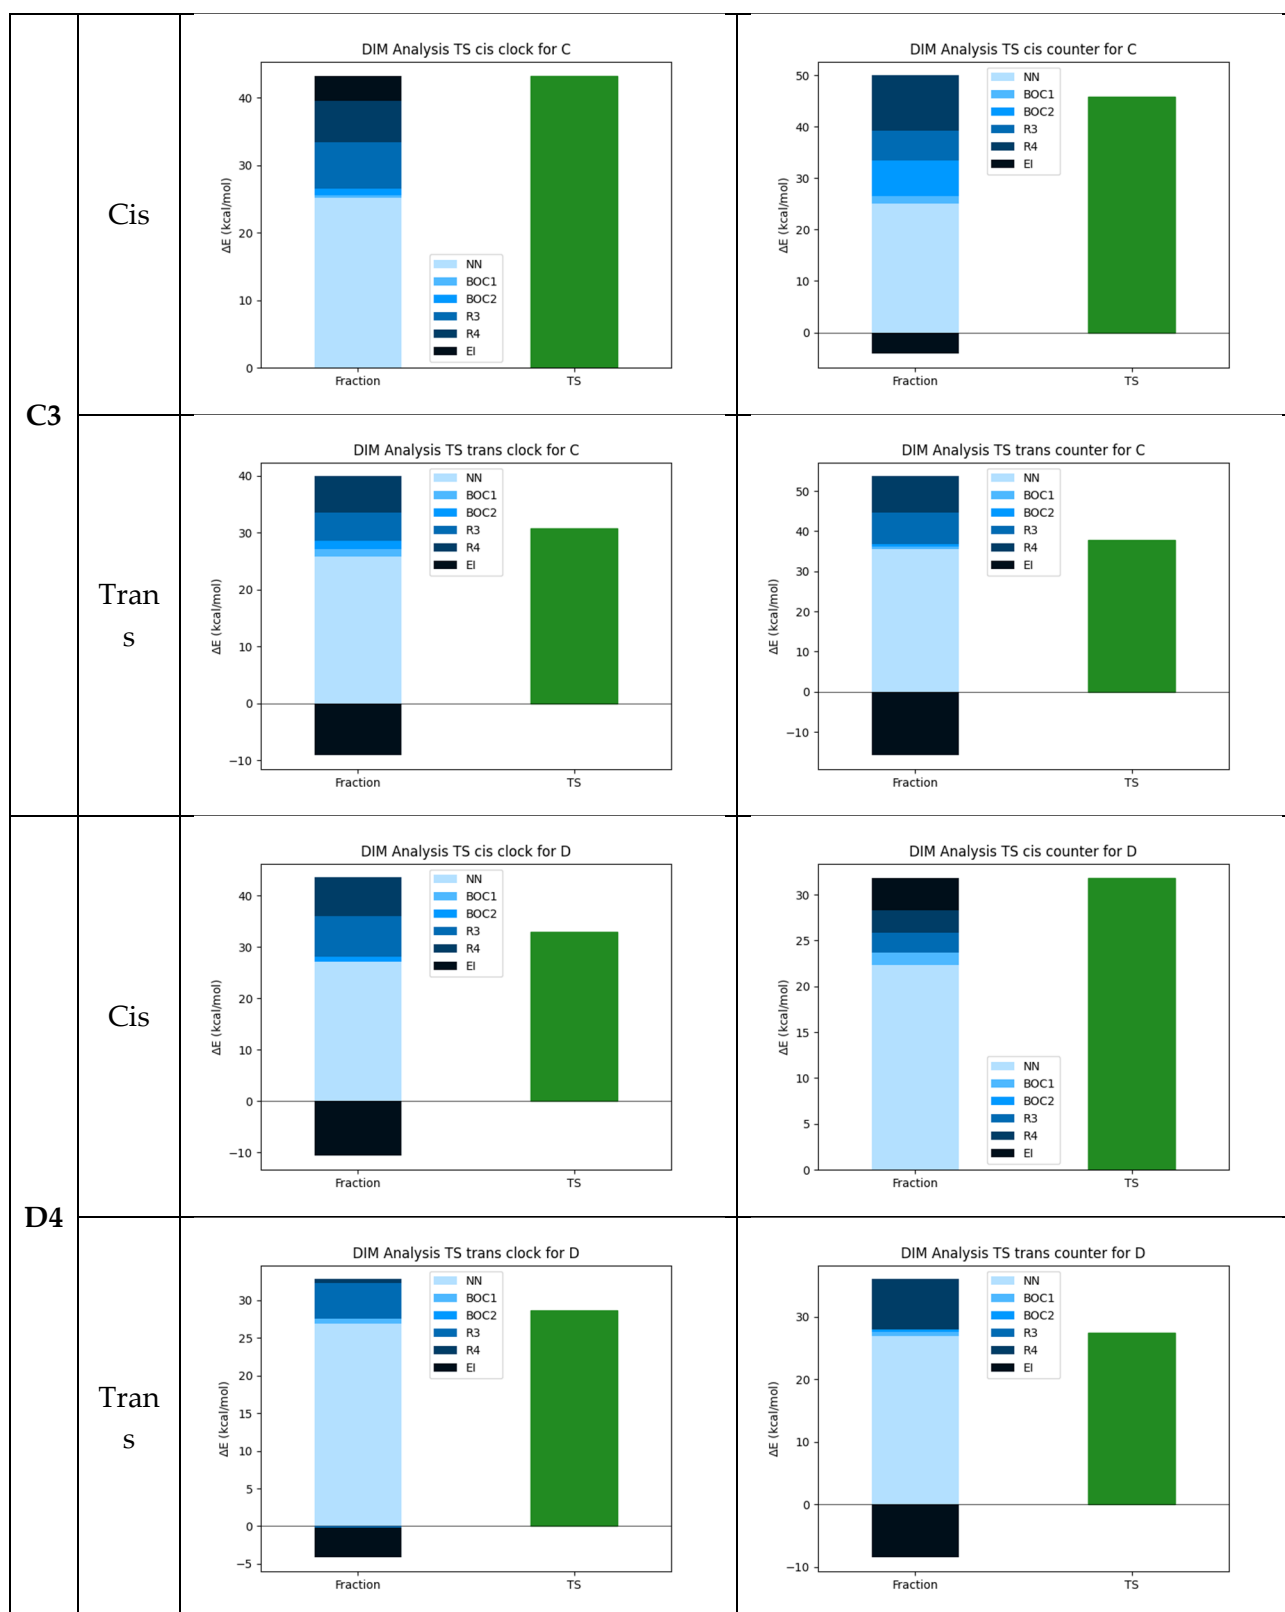



| E5       | Cis                                                                                                                                                                                                                                                                                                                                                                                            | <p>DIM Analysis TS cis clock for E</p> <table><tr><th>Category</th><th>Sub-category</th><th>Value (kcal/mol)</th></tr><tr><td rowspan="6">Fraction</td><td>NN</td><td>22</td></tr><tr><td>BOC1</td><td>1</td></tr><tr><td>BOC2</td><td>1</td></tr><tr><td>R3</td><td>1</td></tr><tr><td>R4</td><td>1</td></tr><tr><td>EI</td><td>5</td></tr><tr><td>TS</td><td></td><td>28</td></tr></table> | Category         | Sub-category     | Value (kcal/mol) | Fraction | NN | 22   | BOC1 | 1    | BOC2 | 1  | R3 | 1  | R4 | 1  | EI | 5  | TS |    | 28                                                                                                                                                                                                                                                                                                                                                                                               | <p>DIM Analysis TS cis counter for E</p> <table><tr><th>Category</th><th>Sub-category</th><th>Value (kcal/mol)</th></tr><tr><td rowspan="6">Fraction</td><td>NN</td><td>23</td></tr><tr><td>BOC1</td><td>1</td></tr><tr><td>BOC2</td><td>1</td></tr><tr><td>R3</td><td>1</td></tr><tr><td>R4</td><td>1</td></tr><tr><td>EI</td><td>3</td></tr><tr><td>TS</td><td></td><td>25</td></tr></table> | Category     | Sub-category     | Value (kcal/mol) | Fraction | NN | 23   | BOC1 | 1    | BOC2 | 1  | R3 | 1  | R4 | 1  | EI | 3  | TS |    | 25 |
|----------|------------------------------------------------------------------------------------------------------------------------------------------------------------------------------------------------------------------------------------------------------------------------------------------------------------------------------------------------------------------------------------------------|----------------------------------------------------------------------------------------------------------------------------------------------------------------------------------------------------------------------------------------------------------------------------------------------------------------------------------------------------------------------------------------------|------------------|------------------|------------------|----------|----|------|------|------|------|----|----|----|----|----|----|----|----|----|--------------------------------------------------------------------------------------------------------------------------------------------------------------------------------------------------------------------------------------------------------------------------------------------------------------------------------------------------------------------------------------------------|------------------------------------------------------------------------------------------------------------------------------------------------------------------------------------------------------------------------------------------------------------------------------------------------------------------------------------------------------------------------------------------------|--------------|------------------|------------------|----------|----|------|------|------|------|----|----|----|----|----|----|----|----|----|----|
|          | Category                                                                                                                                                                                                                                                                                                                                                                                       | Sub-category                                                                                                                                                                                                                                                                                                                                                                                 | Value (kcal/mol) |                  |                  |          |    |      |      |      |      |    |    |    |    |    |    |    |    |    |                                                                                                                                                                                                                                                                                                                                                                                                  |                                                                                                                                                                                                                                                                                                                                                                                                |              |                  |                  |          |    |      |      |      |      |    |    |    |    |    |    |    |    |    |    |
| Fraction | NN                                                                                                                                                                                                                                                                                                                                                                                             | 22                                                                                                                                                                                                                                                                                                                                                                                           |                  |                  |                  |          |    |      |      |      |      |    |    |    |    |    |    |    |    |    |                                                                                                                                                                                                                                                                                                                                                                                                  |                                                                                                                                                                                                                                                                                                                                                                                                |              |                  |                  |          |    |      |      |      |      |    |    |    |    |    |    |    |    |    |    |
|          | BOC1                                                                                                                                                                                                                                                                                                                                                                                           | 1                                                                                                                                                                                                                                                                                                                                                                                            |                  |                  |                  |          |    |      |      |      |      |    |    |    |    |    |    |    |    |    |                                                                                                                                                                                                                                                                                                                                                                                                  |                                                                                                                                                                                                                                                                                                                                                                                                |              |                  |                  |          |    |      |      |      |      |    |    |    |    |    |    |    |    |    |    |
|          | BOC2                                                                                                                                                                                                                                                                                                                                                                                           | 1                                                                                                                                                                                                                                                                                                                                                                                            |                  |                  |                  |          |    |      |      |      |      |    |    |    |    |    |    |    |    |    |                                                                                                                                                                                                                                                                                                                                                                                                  |                                                                                                                                                                                                                                                                                                                                                                                                |              |                  |                  |          |    |      |      |      |      |    |    |    |    |    |    |    |    |    |    |
|          | R3                                                                                                                                                                                                                                                                                                                                                                                             | 1                                                                                                                                                                                                                                                                                                                                                                                            |                  |                  |                  |          |    |      |      |      |      |    |    |    |    |    |    |    |    |    |                                                                                                                                                                                                                                                                                                                                                                                                  |                                                                                                                                                                                                                                                                                                                                                                                                |              |                  |                  |          |    |      |      |      |      |    |    |    |    |    |    |    |    |    |    |
|          | R4                                                                                                                                                                                                                                                                                                                                                                                             | 1                                                                                                                                                                                                                                                                                                                                                                                            |                  |                  |                  |          |    |      |      |      |      |    |    |    |    |    |    |    |    |    |                                                                                                                                                                                                                                                                                                                                                                                                  |                                                                                                                                                                                                                                                                                                                                                                                                |              |                  |                  |          |    |      |      |      |      |    |    |    |    |    |    |    |    |    |    |
|          | EI                                                                                                                                                                                                                                                                                                                                                                                             | 5                                                                                                                                                                                                                                                                                                                                                                                            |                  |                  |                  |          |    |      |      |      |      |    |    |    |    |    |    |    |    |    |                                                                                                                                                                                                                                                                                                                                                                                                  |                                                                                                                                                                                                                                                                                                                                                                                                |              |                  |                  |          |    |      |      |      |      |    |    |    |    |    |    |    |    |    |    |
| TS       |                                                                                                                                                                                                                                                                                                                                                                                                | 28                                                                                                                                                                                                                                                                                                                                                                                           |                  |                  |                  |          |    |      |      |      |      |    |    |    |    |    |    |    |    |    |                                                                                                                                                                                                                                                                                                                                                                                                  |                                                                                                                                                                                                                                                                                                                                                                                                |              |                  |                  |          |    |      |      |      |      |    |    |    |    |    |    |    |    |    |    |
| Category | Sub-category                                                                                                                                                                                                                                                                                                                                                                                   | Value (kcal/mol)                                                                                                                                                                                                                                                                                                                                                                             |                  |                  |                  |          |    |      |      |      |      |    |    |    |    |    |    |    |    |    |                                                                                                                                                                                                                                                                                                                                                                                                  |                                                                                                                                                                                                                                                                                                                                                                                                |              |                  |                  |          |    |      |      |      |      |    |    |    |    |    |    |    |    |    |    |
| Fraction | NN                                                                                                                                                                                                                                                                                                                                                                                             | 23                                                                                                                                                                                                                                                                                                                                                                                           |                  |                  |                  |          |    |      |      |      |      |    |    |    |    |    |    |    |    |    |                                                                                                                                                                                                                                                                                                                                                                                                  |                                                                                                                                                                                                                                                                                                                                                                                                |              |                  |                  |          |    |      |      |      |      |    |    |    |    |    |    |    |    |    |    |
|          | BOC1                                                                                                                                                                                                                                                                                                                                                                                           | 1                                                                                                                                                                                                                                                                                                                                                                                            |                  |                  |                  |          |    |      |      |      |      |    |    |    |    |    |    |    |    |    |                                                                                                                                                                                                                                                                                                                                                                                                  |                                                                                                                                                                                                                                                                                                                                                                                                |              |                  |                  |          |    |      |      |      |      |    |    |    |    |    |    |    |    |    |    |
|          | BOC2                                                                                                                                                                                                                                                                                                                                                                                           | 1                                                                                                                                                                                                                                                                                                                                                                                            |                  |                  |                  |          |    |      |      |      |      |    |    |    |    |    |    |    |    |    |                                                                                                                                                                                                                                                                                                                                                                                                  |                                                                                                                                                                                                                                                                                                                                                                                                |              |                  |                  |          |    |      |      |      |      |    |    |    |    |    |    |    |    |    |    |
|          | R3                                                                                                                                                                                                                                                                                                                                                                                             | 1                                                                                                                                                                                                                                                                                                                                                                                            |                  |                  |                  |          |    |      |      |      |      |    |    |    |    |    |    |    |    |    |                                                                                                                                                                                                                                                                                                                                                                                                  |                                                                                                                                                                                                                                                                                                                                                                                                |              |                  |                  |          |    |      |      |      |      |    |    |    |    |    |    |    |    |    |    |
|          | R4                                                                                                                                                                                                                                                                                                                                                                                             | 1                                                                                                                                                                                                                                                                                                                                                                                            |                  |                  |                  |          |    |      |      |      |      |    |    |    |    |    |    |    |    |    |                                                                                                                                                                                                                                                                                                                                                                                                  |                                                                                                                                                                                                                                                                                                                                                                                                |              |                  |                  |          |    |      |      |      |      |    |    |    |    |    |    |    |    |    |    |
|          | EI                                                                                                                                                                                                                                                                                                                                                                                             | 3                                                                                                                                                                                                                                                                                                                                                                                            |                  |                  |                  |          |    |      |      |      |      |    |    |    |    |    |    |    |    |    |                                                                                                                                                                                                                                                                                                                                                                                                  |                                                                                                                                                                                                                                                                                                                                                                                                |              |                  |                  |          |    |      |      |      |      |    |    |    |    |    |    |    |    |    |    |
| TS       |                                                                                                                                                                                                                                                                                                                                                                                                | 25                                                                                                                                                                                                                                                                                                                                                                                           |                  |                  |                  |          |    |      |      |      |      |    |    |    |    |    |    |    |    |    |                                                                                                                                                                                                                                                                                                                                                                                                  |                                                                                                                                                                                                                                                                                                                                                                                                |              |                  |                  |          |    |      |      |      |      |    |    |    |    |    |    |    |    |    |    |
| Trans    | <p>DIM Analysis TS trans clock for E</p> <table><tr><th>Category</th><th>Sub-category</th><th>Value (kcal/mol)</th></tr><tr><td rowspan="6">Fraction</td><td>NN</td><td>22</td></tr><tr><td>BOC1</td><td>1</td></tr><tr><td>BOC2</td><td>1</td></tr><tr><td>R3</td><td>1</td></tr><tr><td>R4</td><td>1</td></tr><tr><td>EI</td><td>2</td></tr><tr><td>TS</td><td></td><td>24</td></tr></table> | Category                                                                                                                                                                                                                                                                                                                                                                                     | Sub-category     | Value (kcal/mol) | Fraction         | NN       | 22 | BOC1 | 1    | BOC2 | 1    | R3 | 1  | R4 | 1  | EI | 2  | TS |    | 24 | <p>DIM Analysis TS trans counter for E</p> <table><tr><th>Category</th><th>Sub-category</th><th>Value (kcal/mol)</th></tr><tr><td rowspan="6">Fraction</td><td>NN</td><td>25</td></tr><tr><td>BOC1</td><td>1</td></tr><tr><td>BOC2</td><td>1</td></tr><tr><td>R3</td><td>1</td></tr><tr><td>R4</td><td>1</td></tr><tr><td>EI</td><td>2</td></tr><tr><td>TS</td><td></td><td>26</td></tr></table> | Category                                                                                                                                                                                                                                                                                                                                                                                       | Sub-category | Value (kcal/mol) | Fraction         | NN       | 25 | BOC1 | 1    | BOC2 | 1    | R3 | 1  | R4 | 1  | EI | 2  | TS |    | 26 |    |
| Category | Sub-category                                                                                                                                                                                                                                                                                                                                                                                   | Value (kcal/mol)                                                                                                                                                                                                                                                                                                                                                                             |                  |                  |                  |          |    |      |      |      |      |    |    |    |    |    |    |    |    |    |                                                                                                                                                                                                                                                                                                                                                                                                  |                                                                                                                                                                                                                                                                                                                                                                                                |              |                  |                  |          |    |      |      |      |      |    |    |    |    |    |    |    |    |    |    |
| Fraction | NN                                                                                                                                                                                                                                                                                                                                                                                             | 22                                                                                                                                                                                                                                                                                                                                                                                           |                  |                  |                  |          |    |      |      |      |      |    |    |    |    |    |    |    |    |    |                                                                                                                                                                                                                                                                                                                                                                                                  |                                                                                                                                                                                                                                                                                                                                                                                                |              |                  |                  |          |    |      |      |      |      |    |    |    |    |    |    |    |    |    |    |
|          | BOC1                                                                                                                                                                                                                                                                                                                                                                                           | 1                                                                                                                                                                                                                                                                                                                                                                                            |                  |                  |                  |          |    |      |      |      |      |    |    |    |    |    |    |    |    |    |                                                                                                                                                                                                                                                                                                                                                                                                  |                                                                                                                                                                                                                                                                                                                                                                                                |              |                  |                  |          |    |      |      |      |      |    |    |    |    |    |    |    |    |    |    |
|          | BOC2                                                                                                                                                                                                                                                                                                                                                                                           | 1                                                                                                                                                                                                                                                                                                                                                                                            |                  |                  |                  |          |    |      |      |      |      |    |    |    |    |    |    |    |    |    |                                                                                                                                                                                                                                                                                                                                                                                                  |                                                                                                                                                                                                                                                                                                                                                                                                |              |                  |                  |          |    |      |      |      |      |    |    |    |    |    |    |    |    |    |    |
|          | R3                                                                                                                                                                                                                                                                                                                                                                                             | 1                                                                                                                                                                                                                                                                                                                                                                                            |                  |                  |                  |          |    |      |      |      |      |    |    |    |    |    |    |    |    |    |                                                                                                                                                                                                                                                                                                                                                                                                  |                                                                                                                                                                                                                                                                                                                                                                                                |              |                  |                  |          |    |      |      |      |      |    |    |    |    |    |    |    |    |    |    |
|          | R4                                                                                                                                                                                                                                                                                                                                                                                             | 1                                                                                                                                                                                                                                                                                                                                                                                            |                  |                  |                  |          |    |      |      |      |      |    |    |    |    |    |    |    |    |    |                                                                                                                                                                                                                                                                                                                                                                                                  |                                                                                                                                                                                                                                                                                                                                                                                                |              |                  |                  |          |    |      |      |      |      |    |    |    |    |    |    |    |    |    |    |
|          | EI                                                                                                                                                                                                                                                                                                                                                                                             | 2                                                                                                                                                                                                                                                                                                                                                                                            |                  |                  |                  |          |    |      |      |      |      |    |    |    |    |    |    |    |    |    |                                                                                                                                                                                                                                                                                                                                                                                                  |                                                                                                                                                                                                                                                                                                                                                                                                |              |                  |                  |          |    |      |      |      |      |    |    |    |    |    |    |    |    |    |    |
| TS       |                                                                                                                                                                                                                                                                                                                                                                                                | 24                                                                                                                                                                                                                                                                                                                                                                                           |                  |                  |                  |          |    |      |      |      |      |    |    |    |    |    |    |    |    |    |                                                                                                                                                                                                                                                                                                                                                                                                  |                                                                                                                                                                                                                                                                                                                                                                                                |              |                  |                  |          |    |      |      |      |      |    |    |    |    |    |    |    |    |    |    |
| Category | Sub-category                                                                                                                                                                                                                                                                                                                                                                                   | Value (kcal/mol)                                                                                                                                                                                                                                                                                                                                                                             |                  |                  |                  |          |    |      |      |      |      |    |    |    |    |    |    |    |    |    |                                                                                                                                                                                                                                                                                                                                                                                                  |                                                                                                                                                                                                                                                                                                                                                                                                |              |                  |                  |          |    |      |      |      |      |    |    |    |    |    |    |    |    |    |    |
| Fraction | NN                                                                                                                                                                                                                                                                                                                                                                                             | 25                                                                                                                                                                                                                                                                                                                                                                                           |                  |                  |                  |          |    |      |      |      |      |    |    |    |    |    |    |    |    |    |                                                                                                                                                                                                                                                                                                                                                                                                  |                                                                                                                                                                                                                                                                                                                                                                                                |              |                  |                  |          |    |      |      |      |      |    |    |    |    |    |    |    |    |    |    |
|          | BOC1                                                                                                                                                                                                                                                                                                                                                                                           | 1                                                                                                                                                                                                                                                                                                                                                                                            |                  |                  |                  |          |    |      |      |      |      |    |    |    |    |    |    |    |    |    |                                                                                                                                                                                                                                                                                                                                                                                                  |                                                                                                                                                                                                                                                                                                                                                                                                |              |                  |                  |          |    |      |      |      |      |    |    |    |    |    |    |    |    |    |    |
|          | BOC2                                                                                                                                                                                                                                                                                                                                                                                           | 1                                                                                                                                                                                                                                                                                                                                                                                            |                  |                  |                  |          |    |      |      |      |      |    |    |    |    |    |    |    |    |    |                                                                                                                                                                                                                                                                                                                                                                                                  |                                                                                                                                                                                                                                                                                                                                                                                                |              |                  |                  |          |    |      |      |      |      |    |    |    |    |    |    |    |    |    |    |
|          | R3                                                                                                                                                                                                                                                                                                                                                                                             | 1                                                                                                                                                                                                                                                                                                                                                                                            |                  |                  |                  |          |    |      |      |      |      |    |    |    |    |    |    |    |    |    |                                                                                                                                                                                                                                                                                                                                                                                                  |                                                                                                                                                                                                                                                                                                                                                                                                |              |                  |                  |          |    |      |      |      |      |    |    |    |    |    |    |    |    |    |    |
|          | R4                                                                                                                                                                                                                                                                                                                                                                                             | 1                                                                                                                                                                                                                                                                                                                                                                                            |                  |                  |                  |          |    |      |      |      |      |    |    |    |    |    |    |    |    |    |                                                                                                                                                                                                                                                                                                                                                                                                  |                                                                                                                                                                                                                                                                                                                                                                                                |              |                  |                  |          |    |      |      |      |      |    |    |    |    |    |    |    |    |    |    |
|          | EI                                                                                                                                                                                                                                                                                                                                                                                             | 2                                                                                                                                                                                                                                                                                                                                                                                            |                  |                  |                  |          |    |      |      |      |      |    |    |    |    |    |    |    |    |    |                                                                                                                                                                                                                                                                                                                                                                                                  |                                                                                                                                                                                                                                                                                                                                                                                                |              |                  |                  |          |    |      |      |      |      |    |    |    |    |    |    |    |    |    |    |
| TS       |                                                                                                                                                                                                                                                                                                                                                                                                | 26                                                                                                                                                                                                                                                                                                                                                                                           |                  |                  |                  |          |    |      |      |      |      |    |    |    |    |    |    |    |    |    |                                                                                                                                                                                                                                                                                                                                                                                                  |                                                                                                                                                                                                                                                                                                                                                                                                |              |                  |                  |          |    |      |      |      |      |    |    |    |    |    |    |    |    |    |    |
| F6       | Cis                                                                                                                                                                                                                                                                                                                                                                                            | <p>DIM Analysis TS cis clock for F</p> <table><tr><th>Category</th><th>Sub-category</th><th>Value (kcal/mol)</th></tr><tr><td rowspan="6">Fraction</td><td>NN</td><td>18</td></tr><tr><td>BOC1</td><td>1</td></tr><tr><td>BOC2</td><td>1</td></tr><tr><td>R3</td><td>1</td></tr><tr><td>R4</td><td>1</td></tr><tr><td>EI</td><td>8</td></tr><tr><td>TS</td><td></td><td>32</td></tr></table> | Category         | Sub-category     | Value (kcal/mol) | Fraction | NN | 18   | BOC1 | 1    | BOC2 | 1  | R3 | 1  | R4 | 1  | EI | 8  | TS |    | 32                                                                                                                                                                                                                                                                                                                                                                                               | <p>DIM Analysis TS cis counter for F</p> <table><tr><th>Category</th><th>Sub-category</th><th>Value (kcal/mol)</th></tr><tr><td rowspan="6">Fraction</td><td>NN</td><td>16</td></tr><tr><td>BOC1</td><td>1</td></tr><tr><td>BOC2</td><td>1</td></tr><tr><td>R3</td><td>1</td></tr><tr><td>R4</td><td>1</td></tr><tr><td>EI</td><td>7</td></tr><tr><td>TS</td><td></td><td>27</td></tr></table> | Category     | Sub-category     | Value (kcal/mol) | Fraction | NN | 16   | BOC1 | 1    | BOC2 | 1  | R3 | 1  | R4 | 1  | EI | 7  | TS |    | 27 |
|          | Category                                                                                                                                                                                                                                                                                                                                                                                       | Sub-category                                                                                                                                                                                                                                                                                                                                                                                 | Value (kcal/mol) |                  |                  |          |    |      |      |      |      |    |    |    |    |    |    |    |    |    |                                                                                                                                                                                                                                                                                                                                                                                                  |                                                                                                                                                                                                                                                                                                                                                                                                |              |                  |                  |          |    |      |      |      |      |    |    |    |    |    |    |    |    |    |    |
| Fraction | NN                                                                                                                                                                                                                                                                                                                                                                                             | 18                                                                                                                                                                                                                                                                                                                                                                                           |                  |                  |                  |          |    |      |      |      |      |    |    |    |    |    |    |    |    |    |                                                                                                                                                                                                                                                                                                                                                                                                  |                                                                                                                                                                                                                                                                                                                                                                                                |              |                  |                  |          |    |      |      |      |      |    |    |    |    |    |    |    |    |    |    |
|          | BOC1                                                                                                                                                                                                                                                                                                                                                                                           | 1                                                                                                                                                                                                                                                                                                                                                                                            |                  |                  |                  |          |    |      |      |      |      |    |    |    |    |    |    |    |    |    |                                                                                                                                                                                                                                                                                                                                                                                                  |                                                                                                                                                                                                                                                                                                                                                                                                |              |                  |                  |          |    |      |      |      |      |    |    |    |    |    |    |    |    |    |    |
|          | BOC2                                                                                                                                                                                                                                                                                                                                                                                           | 1                                                                                                                                                                                                                                                                                                                                                                                            |                  |                  |                  |          |    |      |      |      |      |    |    |    |    |    |    |    |    |    |                                                                                                                                                                                                                                                                                                                                                                                                  |                                                                                                                                                                                                                                                                                                                                                                                                |              |                  |                  |          |    |      |      |      |      |    |    |    |    |    |    |    |    |    |    |
|          | R3                                                                                                                                                                                                                                                                                                                                                                                             | 1                                                                                                                                                                                                                                                                                                                                                                                            |                  |                  |                  |          |    |      |      |      |      |    |    |    |    |    |    |    |    |    |                                                                                                                                                                                                                                                                                                                                                                                                  |                                                                                                                                                                                                                                                                                                                                                                                                |              |                  |                  |          |    |      |      |      |      |    |    |    |    |    |    |    |    |    |    |
|          | R4                                                                                                                                                                                                                                                                                                                                                                                             | 1                                                                                                                                                                                                                                                                                                                                                                                            |                  |                  |                  |          |    |      |      |      |      |    |    |    |    |    |    |    |    |    |                                                                                                                                                                                                                                                                                                                                                                                                  |                                                                                                                                                                                                                                                                                                                                                                                                |              |                  |                  |          |    |      |      |      |      |    |    |    |    |    |    |    |    |    |    |
|          | EI                                                                                                                                                                                                                                                                                                                                                                                             | 8                                                                                                                                                                                                                                                                                                                                                                                            |                  |                  |                  |          |    |      |      |      |      |    |    |    |    |    |    |    |    |    |                                                                                                                                                                                                                                                                                                                                                                                                  |                                                                                                                                                                                                                                                                                                                                                                                                |              |                  |                  |          |    |      |      |      |      |    |    |    |    |    |    |    |    |    |    |
| TS       |                                                                                                                                                                                                                                                                                                                                                                                                | 32                                                                                                                                                                                                                                                                                                                                                                                           |                  |                  |                  |          |    |      |      |      |      |    |    |    |    |    |    |    |    |    |                                                                                                                                                                                                                                                                                                                                                                                                  |                                                                                                                                                                                                                                                                                                                                                                                                |              |                  |                  |          |    |      |      |      |      |    |    |    |    |    |    |    |    |    |    |
| Category | Sub-category                                                                                                                                                                                                                                                                                                                                                                                   | Value (kcal/mol)                                                                                                                                                                                                                                                                                                                                                                             |                  |                  |                  |          |    |      |      |      |      |    |    |    |    |    |    |    |    |    |                                                                                                                                                                                                                                                                                                                                                                                                  |                                                                                                                                                                                                                                                                                                                                                                                                |              |                  |                  |          |    |      |      |      |      |    |    |    |    |    |    |    |    |    |    |
| Fraction | NN                                                                                                                                                                                                                                                                                                                                                                                             | 16                                                                                                                                                                                                                                                                                                                                                                                           |                  |                  |                  |          |    |      |      |      |      |    |    |    |    |    |    |    |    |    |                                                                                                                                                                                                                                                                                                                                                                                                  |                                                                                                                                                                                                                                                                                                                                                                                                |              |                  |                  |          |    |      |      |      |      |    |    |    |    |    |    |    |    |    |    |
|          | BOC1                                                                                                                                                                                                                                                                                                                                                                                           | 1                                                                                                                                                                                                                                                                                                                                                                                            |                  |                  |                  |          |    |      |      |      |      |    |    |    |    |    |    |    |    |    |                                                                                                                                                                                                                                                                                                                                                                                                  |                                                                                                                                                                                                                                                                                                                                                                                                |              |                  |                  |          |    |      |      |      |      |    |    |    |    |    |    |    |    |    |    |
|          | BOC2                                                                                                                                                                                                                                                                                                                                                                                           | 1                                                                                                                                                                                                                                                                                                                                                                                            |                  |                  |                  |          |    |      |      |      |      |    |    |    |    |    |    |    |    |    |                                                                                                                                                                                                                                                                                                                                                                                                  |                                                                                                                                                                                                                                                                                                                                                                                                |              |                  |                  |          |    |      |      |      |      |    |    |    |    |    |    |    |    |    |    |
|          | R3                                                                                                                                                                                                                                                                                                                                                                                             | 1                                                                                                                                                                                                                                                                                                                                                                                            |                  |                  |                  |          |    |      |      |      |      |    |    |    |    |    |    |    |    |    |                                                                                                                                                                                                                                                                                                                                                                                                  |                                                                                                                                                                                                                                                                                                                                                                                                |              |                  |                  |          |    |      |      |      |      |    |    |    |    |    |    |    |    |    |    |
|          | R4                                                                                                                                                                                                                                                                                                                                                                                             | 1                                                                                                                                                                                                                                                                                                                                                                                            |                  |                  |                  |          |    |      |      |      |      |    |    |    |    |    |    |    |    |    |                                                                                                                                                                                                                                                                                                                                                                                                  |                                                                                                                                                                                                                                                                                                                                                                                                |              |                  |                  |          |    |      |      |      |      |    |    |    |    |    |    |    |    |    |    |
|          | EI                                                                                                                                                                                                                                                                                                                                                                                             | 7                                                                                                                                                                                                                                                                                                                                                                                            |                  |                  |                  |          |    |      |      |      |      |    |    |    |    |    |    |    |    |    |                                                                                                                                                                                                                                                                                                                                                                                                  |                                                                                                                                                                                                                                                                                                                                                                                                |              |                  |                  |          |    |      |      |      |      |    |    |    |    |    |    |    |    |    |    |
| TS       |                                                                                                                                                                                                                                                                                                                                                                                                | 27                                                                                                                                                                                                                                                                                                                                                                                           |                  |                  |                  |          |    |      |      |      |      |    |    |    |    |    |    |    |    |    |                                                                                                                                                                                                                                                                                                                                                                                                  |                                                                                                                                                                                                                                                                                                                                                                                                |              |                  |                  |          |    |      |      |      |      |    |    |    |    |    |    |    |    |    |    |
| Trans    | <p>DIM Analysis TS trans clock for F</p> <table><tr><th>Category</th><th>Sub-category</th><th>Value (kcal/mol)</th></tr><tr><td rowspan="6">Fraction</td><td>NN</td><td>22</td></tr><tr><td>BOC1</td><td>1</td></tr><tr><td>BOC2</td><td>1</td></tr><tr><td>R3</td><td>1</td></tr><tr><td>R4</td><td>1</td></tr><tr><td>EI</td><td>6</td></tr><tr><td>TS</td><td></td><td>30</td></tr></table> | Category                                                                                                                                                                                                                                                                                                                                                                                     | Sub-category     | Value (kcal/mol) | Fraction         | NN       | 22 | BOC1 | 1    | BOC2 | 1    | R3 | 1  | R4 | 1  | EI | 6  | TS |    | 30 | N.F.                                                                                                                                                                                                                                                                                                                                                                                             |                                                                                                                                                                                                                                                                                                                                                                                                |              |                  |                  |          |    |      |      |      |      |    |    |    |    |    |    |    |    |    |    |
| Category | Sub-category                                                                                                                                                                                                                                                                                                                                                                                   | Value (kcal/mol)                                                                                                                                                                                                                                                                                                                                                                             |                  |                  |                  |          |    |      |      |      |      |    |    |    |    |    |    |    |    |    |                                                                                                                                                                                                                                                                                                                                                                                                  |                                                                                                                                                                                                                                                                                                                                                                                                |              |                  |                  |          |    |      |      |      |      |    |    |    |    |    |    |    |    |    |    |
| Fraction | NN                                                                                                                                                                                                                                                                                                                                                                                             | 22                                                                                                                                                                                                                                                                                                                                                                                           |                  |                  |                  |          |    |      |      |      |      |    |    |    |    |    |    |    |    |    |                                                                                                                                                                                                                                                                                                                                                                                                  |                                                                                                                                                                                                                                                                                                                                                                                                |              |                  |                  |          |    |      |      |      |      |    |    |    |    |    |    |    |    |    |    |
|          | BOC1                                                                                                                                                                                                                                                                                                                                                                                           | 1                                                                                                                                                                                                                                                                                                                                                                                            |                  |                  |                  |          |    |      |      |      |      |    |    |    |    |    |    |    |    |    |                                                                                                                                                                                                                                                                                                                                                                                                  |                                                                                                                                                                                                                                                                                                                                                                                                |              |                  |                  |          |    |      |      |      |      |    |    |    |    |    |    |    |    |    |    |
|          | BOC2                                                                                                                                                                                                                                                                                                                                                                                           | 1                                                                                                                                                                                                                                                                                                                                                                                            |                  |                  |                  |          |    |      |      |      |      |    |    |    |    |    |    |    |    |    |                                                                                                                                                                                                                                                                                                                                                                                                  |                                                                                                                                                                                                                                                                                                                                                                                                |              |                  |                  |          |    |      |      |      |      |    |    |    |    |    |    |    |    |    |    |
|          | R3                                                                                                                                                                                                                                                                                                                                                                                             | 1                                                                                                                                                                                                                                                                                                                                                                                            |                  |                  |                  |          |    |      |      |      |      |    |    |    |    |    |    |    |    |    |                                                                                                                                                                                                                                                                                                                                                                                                  |                                                                                                                                                                                                                                                                                                                                                                                                |              |                  |                  |          |    |      |      |      |      |    |    |    |    |    |    |    |    |    |    |
|          | R4                                                                                                                                                                                                                                                                                                                                                                                             | 1                                                                                                                                                                                                                                                                                                                                                                                            |                  |                  |                  |          |    |      |      |      |      |    |    |    |    |    |    |    |    |    |                                                                                                                                                                                                                                                                                                                                                                                                  |                                                                                                                                                                                                                                                                                                                                                                                                |              |                  |                  |          |    |      |      |      |      |    |    |    |    |    |    |    |    |    |    |
|          | EI                                                                                                                                                                                                                                                                                                                                                                                             | 6                                                                                                                                                                                                                                                                                                                                                                                            |                  |                  |                  |          |    |      |      |      |      |    |    |    |    |    |    |    |    |    |                                                                                                                                                                                                                                                                                                                                                                                                  |                                                                                                                                                                                                                                                                                                                                                                                                |              |                  |                  |          |    |      |      |      |      |    |    |    |    |    |    |    |    |    |    |
| TS       |                                                                                                                                                                                                                                                                                                                                                                                                | 30                                                                                                                                                                                                                                                                                                                                                                                           |                  |                  |                  |          |    |      |      |      |      |    |    |    |    |    |    |    |    |    |                                                                                                                                                                                                                                                                                                                                                                                                  |                                                                                                                                                                                                                                                                                                                                                                                                |              |                  |                  |          |    |      |      |      |      |    |    |    |    |    |    |    |    |    |    |

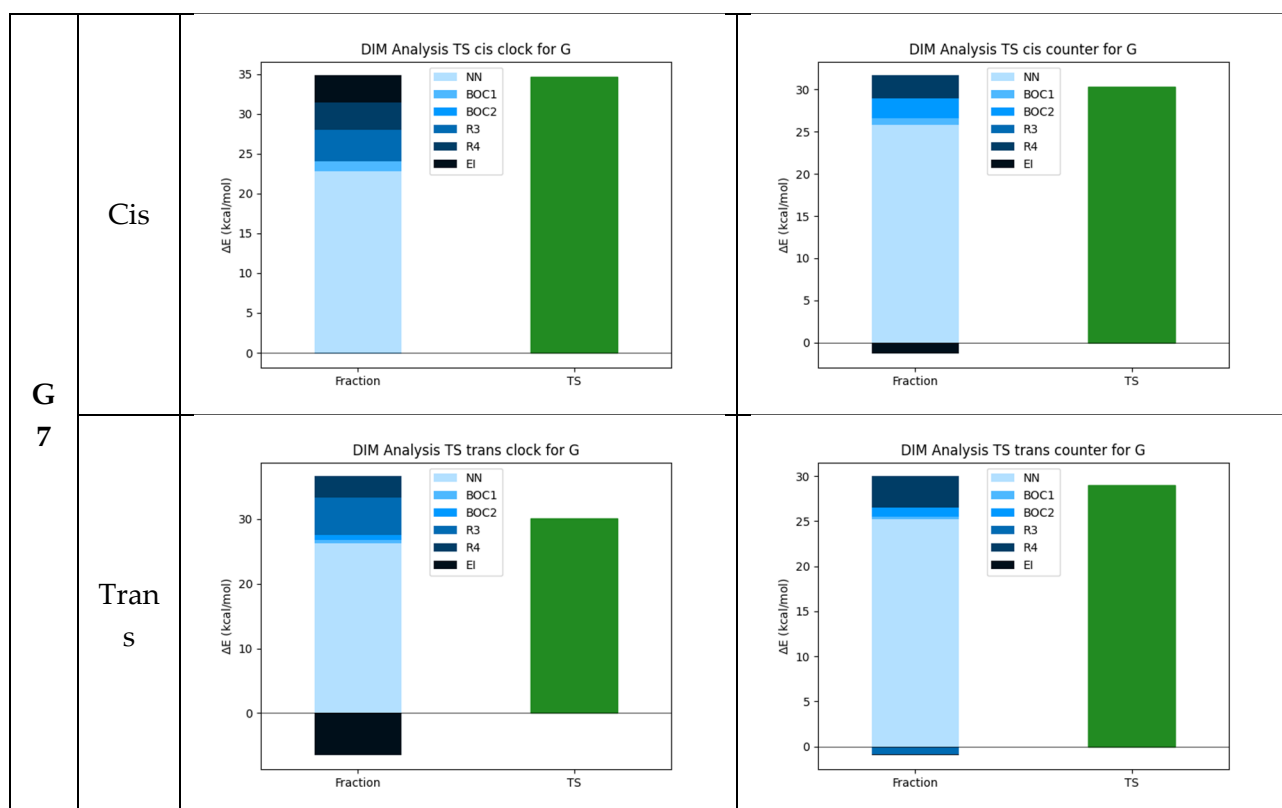

Table S12. DIM energies. N.F.: not found.

From these graphs, it is notable that the major contribution to the distortion of the structure from the GP1 minimum state to TS is due to the N-N fragment, followed by the substituent groups R<sub>3</sub> and R<sub>4</sub>, confirming that for both BOCs there is minimal distortion.

In addition, it is observed that for some structures such as in the cis clock and trans counter case of A1, the contribution of interaction energy is stabilizing. While in cases such as the cis clock of B there is for the interaction energy a destabilizing contribution. The magnitude of this contribution to the total TS energy does not have a constant trend. In the specific case of E5, the interaction energy of all four TS structures shows a significant destabilizing contribution.

## Geometries

### A1\_GP2\_C

Inner Energy (Hartree) : -1422.484942  
Zero Point Energy (Hartree) : 0.590395  
Enthalpy (Hartree) : -1421.860464  
Entropy (Hartree) : 0.092613  
Gibbs Energy (Hartree) : -1421.953077

#### Minimum geometry

|   |           |           |           |
|---|-----------|-----------|-----------|
| N | 0.391281  | -0.073629 | -0.285055 |
| N | 0.604149  | -1.277767 | 0.350810  |
| C | -0.570670 | -2.032115 | 0.768945  |
| C | -0.124368 | -0.117846 | -1.649592 |
| C | -1.631851 | 0.033170  | -1.752688 |
| C | -1.478557 | -1.265664 | 1.706051  |
| C | -2.332661 | 0.780030  | -0.807038 |
| C | -3.711309 | 0.940010  | -0.898384 |
| C | -4.403794 | 0.353790  | -1.951160 |
| C | -3.708475 | -0.384435 | -2.904751 |
| C | -2.325034 | -0.556003 | -2.824623 |
| C | -2.872163 | -1.424252 | 1.630212  |
| C | -3.675367 | -0.689249 | 2.504855  |
| C | -3.125640 | 0.187890  | 3.434275  |
| C | -1.744207 | 0.331336  | 3.509496  |
| C | -0.929393 | -0.400048 | 2.651653  |
| C | -1.604084 | -1.366096 | -3.875438 |
| C | -3.515022 | -2.340144 | 0.617385  |
| O | 0.677716  | 2.114905  | -0.460189 |
| C | 1.066856  | 3.456292  | -0.035943 |
| C | 0.393049  | 3.794730  | 1.292255  |
| C | 0.513355  | 4.328895  | -1.158602 |
| C | 2.588442  | 3.563630  | 0.035240  |
| C | 0.952371  | 1.043984  | 0.292963  |
| O | 1.587630  | 1.034323  | 1.328691  |
| O | 2.686602  | -1.134665 | -0.434362 |
| C | 4.132631  | -1.283114 | -0.304556 |
| C | 4.535570  | -1.141197 | 1.161314  |
| C | 4.655432  | -0.103952 | -1.120078 |
| C | 4.578590  | -2.610853 | -0.910710 |
| C | 1.847975  | -1.874875 | 0.293106  |
| O | 2.098088  | -2.929297 | 0.844974  |
| H | -1.125679 | -2.343800 | -0.123917 |
| H | -0.187745 | -2.938487 | 1.243760  |
| H | 0.371585  | 0.662739  | -2.232476 |
| H | 0.200351  | -1.075512 | -2.064801 |
| H | -1.798455 | 1.219932  | 0.027960  |
| H | -4.238232 | 1.509773  | -0.139282 |
| H | -5.480884 | 0.466583  | -2.032322 |
| H | -4.249664 | -0.843162 | -3.728670 |
| H | -4.755305 | -0.801506 | 2.446345  |
| H | -3.774758 | 0.753878  | 4.096301  |
| H | -1.298642 | 1.009537  | 4.231311  |
| H | 0.147933  | -0.275290 | 2.689614  |
| H | -2.295587 | -1.692367 | -4.656919 |
| H | -0.804901 | -0.790944 | -4.356852 |
| H | -1.142990 | -2.264813 | -3.447092 |
| H | -4.600865 | -2.355157 | 0.745700  |
| H | -3.310205 | -2.003974 | -0.406537 |
| H | -3.154551 | -3.370997 | 0.708687  |
| H | 0.583375  | 4.844225  | 1.538713  |
| H | -0.689759 | 3.651475  | 1.213112  |
| H | 0.775525  | 3.167980  | 2.099000  |
| H | 0.728536  | 5.381844  | -0.953478 |
| H | -0.570335 | 4.202123  | -1.242008 |
| H | 0.970286  | 4.060047  | -2.116032 |
| H | 3.032815  | 3.249372  | -0.915067 |
| H | 2.871024  | 4.605529  | 0.217529  |
| H | 2.989537  | 2.943721  | 0.838365  |
| H | 4.201482  | -1.998223 | 1.748975  |
| H | 5.625647  | -1.071063 | 1.233091  |
| H | 4.094441  | -0.230878 | 1.578885  |
| H | 5.749670  | -0.102671 | -1.118006 |
| H | 4.301912  | 0.839137  | -0.691724 |
| H | 4.309113  | -0.169673 | -2.156321 |
| H | 4.232455  | -2.689989 | -1.946498 |
| H | 5.672322  | -2.664091 | -0.908860 |
| H | 4.182209  | -3.451144 | -0.338815 |

### A1\_CIS\_C

Inner Energy (Hartree) : -1422.438149  
Zero Point Energy (Hartree) : 0.589761  
Enthalpy (Hartree) : -1421.815410  
Entropy (Hartree) : 0.089502  
Gibbs Energy (Hartree) : -1421.904912  
Imaginary frequency (cm-1): -43.38

|   |           |           |           |
|---|-----------|-----------|-----------|
| N | 0.294985  | 0.596899  | -0.438985 |
| N | 0.694441  | -0.761814 | -0.685106 |
| C | -0.430599 | -1.704411 | -0.565786 |
| C | -0.675036 | 1.058946  | -1.448592 |
| C | -2.123547 | 0.968119  | -1.017866 |
| C | -1.346358 | -1.688266 | 0.650813  |
| C | -2.469041 | 1.361127  | 0.274602  |
| C | -3.783361 | 1.294376  | 0.715682  |
| C | -4.774092 | 0.840622  | -0.149526 |
| C | -4.439162 | 0.471802  | -1.447071 |
| C | -3.119068 | 0.530350  | -1.903857 |
| C | -2.603387 | -2.309237 | 0.525153  |
| C | -3.478569 | -2.292534 | 1.611406  |
| C | -3.135436 | -1.676128 | 2.809713  |
| C | -1.890343 | -1.072682 | 2.931746  |
| C | -1.004443 | -1.082151 | 1.858895  |
| C | -2.801517 | 0.121675  | -3.323880 |
| C | -3.029401 | -2.982135 | -0.757210 |
| O | 0.795506  | 2.697983  | 0.078088  |
| C | 1.649900  | 3.830006  | 0.432253  |
| C | 2.241353  | 3.617909  | 1.823859  |
| C | 0.664213  | 4.994868  | 0.436018  |
| C | 2.724199  | 4.035831  | -0.633282 |
| C | 1.297805  | 1.466147  | -0.066008 |
| O | 2.453051  | 1.137280  | 0.134710  |
| O | 2.718820  | -1.696306 | -0.824409 |
| C | 3.968389  | -2.327657 | -0.392706 |
| C | 4.800191  | -1.337621 | 0.418752  |
| C | 4.651045  | -2.644792 | -1.720120 |
| C | 3.666288  | -3.611107 | 0.377897  |
| C | 1.847022  | -1.238632 | 0.061395  |
| O | 1.924849  | -1.340320 | 1.261527  |
| H | -1.046666 | -1.565776 | -1.459651 |
| H | 0.022879  | -2.696275 | -0.686751 |
| H | -0.434769 | 2.098302  | -1.678778 |
| H | -0.482240 | 0.477754  | -2.354654 |
| H | -1.683025 | 1.692429  | 0.945933  |
| H | -4.029508 | 1.581025  | 1.733254  |
| H | -5.805785 | 0.774450  | 0.183318  |
| H | -5.215803 | 0.123484  | -2.123809 |
| H | -4.450755 | -2.769227 | 1.510560  |
| H | -3.835625 | -1.672637 | 3.640266  |
| H | -1.601408 | -0.590987 | 3.861564  |
| H | -0.033883 | -0.616637 | 1.962923  |
| H | -3.711725 | -0.174215 | -3.852794 |
| H | -2.339104 | 0.937361  | -3.890953 |
| H | -2.110085 | -0.729744 | -3.363609 |
| H | -3.982723 | -3.500858 | -0.623044 |
| H | -3.165661 | -2.250266 | -1.562834 |
| H | -2.295169 | -3.719137 | -1.102568 |
| H | 2.770805  | 4.524596  | 2.134022  |
| H | 1.443140  | 3.421897  | 2.546932  |
| H | 2.940573  | 2.780778  | 1.831638  |
| H | 1.182932  | 5.920282  | 0.703591  |
| H | -0.134434 | 4.819508  | 1.163043  |
| H | 0.213093  | 5.121601  | -0.552974 |
| H | 2.264287  | 4.119809  | -1.623482 |
| H | 3.262974  | 4.966138  | -0.426826 |
| H | 3.438948  | 3.211817  | -0.641060 |
| H | 4.330904  | -1.117449 | 1.378189  |
| H | 5.791574  | -1.766219 | 0.598563  |
| H | 4.917146  | -0.401901 | -0.135071 |
| H | 5.613026  | -3.132881 | -1.536654 |
| H | 4.827900  | -1.727091 | -2.288916 |
| H | 4.029756  | -3.314400 | -2.322815 |
| H | 3.016966  | -4.264773 | -0.214092 |
| H | 4.602700  | -4.144405 | 0.571065  |
| H | 3.182705  | -3.397614 | 1.332100  |

### A1\_GP2\_CC

Inner Energy (Hartree) : -1422.484374  
Zero Point Energy (Hartree) : 0.590589  
Enthalpy (Hartree) : -1421.859684  
Entropy (Hartree) : 0.092512  
Gibbs Energy (Hartree) : -1421.952196

Minimum geometry

N 0.693020 -0.523717 -0.005777  
N -0.293541 0.440037 -0.166633  
C -1.121566 0.332874 -1.380162  
C 0.626406 -1.320883 1.219146  
C -0.622008 -2.164140 1.290682  
C -2.593061 0.603989 -1.143902  
C -1.543847 -1.921613 2.308009  
C -2.716402 -2.664088 2.411339  
C -2.974646 -3.660395 1.476834  
C -2.053342 -3.914023 0.463389  
C -0.868330 -3.184055 0.354163  
C -3.265947 1.674034 -1.756233  
C -4.631106 1.833790 -1.499224  
C -5.325070 0.965012 -0.663510  
C -4.655049 -0.100886 -0.071679  
C -3.299624 -0.274578 -0.321665  
C 0.104782 -3.492549 -0.757595  
C -2.563115 2.642408 -2.675878  
O 2.796685 -1.188293 -0.383453  
C 4.092712 -1.208608 -1.059181  
C 3.901568 -1.504028 -2.544765  
C 4.806614 -2.365698 -0.366603  
C 4.830814 0.105609 -0.814263  
C 1.856354 -0.300942 -0.718364  
O 1.956205 0.576273 -1.555320  
O 0.949953 1.678475 1.223911  
C 1.582455 2.902021 1.706098  
C 2.173343 3.675173 0.529100  
C 2.691674 2.362963 2.604885  
C 0.582307 3.728688 2.509855  
C -0.015925 1.716125 0.301239  
O -0.620897 2.699539 -0.071364  
H -0.706234 0.982506 -2.153819  
H -0.996056 -0.699800 -1.712337  
H 1.519461 -1.945186 1.238769  
H 0.675845 -0.644489 2.079211  
H -1.345874 -1.124876 3.020383  
H -3.425081 -2.456431 3.207074  
H -3.888306 -4.244411 1.535161  
H -2.256063 -4.700843 -0.259011  
H -5.158831 2.662378 -1.965392  
H -6.385123 1.118623 -0.482172  
H -5.179661 -0.797706 0.575689  
H -2.774496 -1.110284 0.127569  
H -0.101397 -4.475439 -1.190407  
H 0.040427 -2.752349 -1.562994  
H 1.142645 -3.484201 -0.408764  
H -3.245147 3.435750 -2.995127  
H -1.709533 3.101437 -2.169512  
H -2.190537 2.145518 -3.579433  
H 4.879731 -1.652430 -3.013325  
H 3.316578 -2.420565 -2.674626  
H 3.391775 -0.681647 -3.048386  
H 5.808785 -2.490354 -0.787431  
H 4.251994 -3.298807 -0.506637  
H 4.901004 -2.172883 0.706453  
H 4.889126 0.311174 0.259784  
H 5.851152 0.025904 -1.202953  
H 4.329034 0.937517 -1.310171  
H 1.389399 4.096201 -0.102295  
H 2.797082 4.491386 0.907373  
H 2.795236 3.010640 -0.079029  
H 3.253745 3.192379 3.044496  
H 3.381695 1.739809 2.027150  
H 2.270948 1.759108 3.415030  
H 0.149930 3.123351 3.313210  
H 1.096592 4.583150 2.961918  
H -0.221735 4.096481 1.870935

A1\_CIS\_CC

Inner Energy (Hartree) : -1422.429650  
Zero Point Energy (Hartree) : 0.590542

Enthalpy (Hartree) : -1421.806161  
Entropy (Hartree) : 0.089972  
Gibbs Energy (Hartree) : -1421.896133  
Imaginary frequency (cm-1): -38.33

N 0.256426 -0.219293 -0.313190  
N 0.710051 0.059303 1.012591  
C 2.032761 -0.491523 1.279394  
C 0.179045 -1.667629 -0.600848  
C -0.824162 -2.516674 0.164638  
C 3.093264 -0.089941 0.272758  
C -0.872989 -2.484288 1.562045  
C -1.769829 -3.273572 2.273382  
C -2.628989 -4.126241 1.590825  
C -2.577719 -4.177725 0.202704  
C -1.688468 -3.385234 -0.527321  
C 4.230097 -0.896152 0.100985  
C 5.216453 -0.482748 -0.797726  
C 5.090853 0.701020 -1.516824  
C 3.963154 1.495925 -1.339546  
C 2.973388 1.097897 -0.448311  
C -1.682540 -3.493808 -2.034695  
C 4.405458 -2.183866 0.870624  
O -0.639356 1.013108 -1.931849  
C -1.642639 1.398483 -2.928706  
C -2.368268 0.149165 -3.420336  
C -0.784281 2.000267 -4.037225  
C -2.607904 2.436928 -2.370453  
C -0.962612 0.382202 -0.808013  
O -2.073309 0.203438 -0.374716  
O -0.613101 1.871998 1.250451  
C -1.474028 2.726404 2.077659  
C -2.217601 1.863698 3.094748  
C -2.450440 3.314835 1.068156  
C -0.645720 3.831367 2.728707  
C 0.280508 1.073601 1.833831  
O 0.721375 1.209779 2.964070  
H 2.297428 -0.138891 2.277706  
H 1.960865 -1.581513 1.354653  
H -0.025840 -1.707054 -1.672899  
H 1.189770 -2.074622 -0.494107  
H -0.217221 -1.817709 2.109466  
H -1.791748 -3.220535 3.357742  
H -3.333113 -4.750607 2.132896  
H -3.245743 -4.847812 -0.332832  
H 6.099071 -1.103088 -0.933443  
H 5.870551 0.999586 -2.211418  
H 3.850126 2.422194 -1.894908  
H 2.085465 1.709726 -0.324428  
H -2.411220 -4.237115 -2.369161  
H -1.945284 -2.542338 -2.509588  
H -0.703183 -3.795923 -2.422714  
H 5.373721 -2.640222 0.647727  
H 4.355413 -2.021263 1.953285  
H 3.629981 -2.918099 0.618281  
H -3.046366 0.419393 -4.235707  
H -1.648407 -0.581214 -3.804974  
H -2.955679 -0.306893 -2.620134  
H -1.418904 2.313325 -4.871725  
H -0.059825 1.266964 -4.403483  
H -0.238289 2.873298 -3.667275  
H -2.055466 3.277699 -1.941929  
H -3.233101 2.816822 -3.184985  
H -3.253959 2.006309 -1.605231  
H -1.538229 1.459003 3.846772  
H -2.974870 2.471853 3.599615  
H -2.719935 1.037162 2.581990  
H -3.144595 3.989593 1.578196  
H -3.020173 2.519448 0.582933  
H -1.914198 3.884241 0.303323  
H -0.082521 4.378491 1.965585  
H -1.317671 4.536396 3.229463  
H 0.052176 3.422386 3.459137

A1\_GP1

Inner Energy (Hartree) : -1422.496585  
Zero Point Energy (Hartree) : 0.590922  
Enthalpy (Hartree) : -1421.871997  
Entropy (Hartree) : 0.090873

Gibbs Energy (Hartree) : -1421.962870

#### Minimum geometry

N -0.029172 -0.839063 -0.686007  
N 0.029222 -0.839113 0.685890  
C 0.894789 -1.831142 1.318463  
C -0.894754 -1.831036 -1.318660  
C -2.338574 -1.701019 -0.889747  
C 2.338618 -1.701068 0.889598  
C -2.799482 -2.482349 0.168224  
C -4.109232 -2.375865 0.629068  
C -4.974231 -1.479722 0.013311  
C -4.520133 -0.696667 -1.046392  
C -3.206842 -0.784979 -1.508581  
C 3.206841 -0.785044 1.508517  
C 4.520155 -0.696693 1.046404  
C 4.974321 -1.479700 -0.013307  
C 4.109363 -2.375819 -0.629156  
C 2.799587 -2.482335 -0.168393  
C -2.739682 0.097097 -2.637611  
C 2.739606 0.096955 2.637579  
O 1.358602 0.909520 -0.637618  
C 2.165088 1.986705 -1.201067  
C 3.268094 1.415142 -2.088838  
C 2.767124 2.639717 0.039282  
C 1.260585 2.969876 -1.941060  
C 0.681569 0.078628 -1.428142  
O 0.647714 0.097250 -2.646031  
O -1.358692 0.909373 0.637679  
C -2.165143 1.986543 1.201215  
C -3.268174 1.414944 2.088933  
C -2.767156 2.639664 -0.039086  
C -1.260630 2.969652 1.941279  
C -0.681579 0.078459 1.428113  
O -0.647732 0.096935 2.646005  
H 0.766880 -1.699483 2.392623  
H 0.524923 -2.831845 1.061967  
H -0.766860 -1.699293 -2.392810  
H -0.524872 -2.831752 -1.062243  
H -2.118445 -3.186053 0.641846  
H -4.447816 -2.989890 1.457855  
H -6.001328 -1.386281 0.353823  
H -5.201360 0.003299 -1.524400  
H 5.201345 0.003265 1.524475  
H 6.001436 -1.386234 -0.353757  
H 4.447998 -2.989801 -1.457955  
H 2.118584 -3.186024 -0.642085  
H -3.546585 0.751667 -2.979216  
H -1.899239 0.724472 -2.326717  
H -2.396835 -0.490166 -3.496837  
H 3.546405 0.751698 2.979097  
H 1.898992 0.724149 2.326780  
H 2.396987 -0.490384 3.496847  
H 3.963033 2.216541 -2.361082  
H 3.823067 0.645671 -1.542404  
H 2.857299 0.978922 -3.000057  
H 3.358822 3.513220 -0.251205  
H 3.418169 1.934096 0.562593  
H 1.978670 2.964323 0.725646  
H 0.467579 3.325400 -1.274184  
H 1.848787 3.834292 -2.265615  
H 0.806858 2.504044 -2.817120  
H -2.857403 0.978695 3.000149  
H -3.963134 2.216325 2.361180  
H -3.823118 0.645484 1.542453  
H -3.358819 3.513171 0.251461  
H -3.418230 1.934106 -0.562448  
H -1.978686 2.964284 -0.725425  
H -0.467632 3.325233 1.274424  
H -1.848832 3.834039 2.265912  
H -0.806896 2.503754 2.817299

#### A1\_TRANS\_CC

Inner Energy (Hartree) : -1422.446556  
Zero Point Energy (Hartree) : 0.590734  
Enthalpy (Hartree) : -1421.822974  
Entropy (Hartree) : 0.089448  
Gibbs Energy (Hartree) : -1421.912423  
Imaginary frequency (cm-1): -22.38

N 0.633526 -0.187029 -1.018183  
N -0.425921 -0.918775 -1.659731  
C -0.502204 -2.365296 -1.265361  
C 0.586980 1.284508 -0.981289  
C 0.428520 1.872803 0.402761  
C -0.668181 -2.582236 0.227000  
C 0.213286 1.061121 1.511873  
C 0.052452 1.613165 2.778339  
C 0.109527 2.993122 2.942884  
C 0.333233 3.807244 1.836187  
C 0.497544 3.266116 0.559841  
C -1.927127 -2.766502 0.829602  
C -1.994294 -2.846939 2.223562  
C -0.853915 -2.780540 3.017720  
C 0.394549 -2.669590 2.416428  
C 0.475545 -2.579667 1.031299  
C 0.720502 4.169956 -0.627553  
C -3.190279 -2.978235 0.026942  
O 2.772611 0.035152 -0.507463  
C 4.186137 -0.311053 -0.417509  
C 4.348533 -1.645667 0.307266  
C 4.743698 0.831216 0.427623  
C 4.822891 -0.319889 -1.805143  
C 1.898870 -0.728099 -1.177179  
O 2.172595 -1.754317 -1.770738  
O -1.952019 0.549632 -0.739455  
C -3.205597 1.316551 -0.696194  
C -3.391824 2.073969 -2.007917  
C -2.979578 2.282548 0.461715  
C -4.375215 0.386108 -0.387735  
C -1.729542 -0.371723 -1.668194  
O -2.554257 -0.799362 -2.450633  
H -1.342882 -2.755133 -1.836549  
H 0.400633 -2.847508 -1.627294  
H 1.516391 1.651708 -1.421315  
H -0.208591 1.629372 -1.642177  
H 0.159677 -0.012789 1.373987  
H -0.119961 0.961660 3.630284  
H -0.016376 3.436730 3.926274  
H 0.379920 4.886382 1.962191  
H -2.965111 -2.978928 2.694983  
H -0.941583 -2.840836 4.098629  
H 1.299376 -2.651724 3.016617  
H 1.450982 -2.515460 0.559261  
H 0.725506 5.220881 -0.325857  
H 1.676458 3.961458 -1.123642  
H -0.065020 4.045480 -1.383979  
H -4.072779 -2.902057 0.668543  
H -3.309490 -2.269050 -0.792780  
H -3.191239 -3.982809 -0.414169  
H 5.409657 -1.823322 0.509388  
H 3.817128 -1.619941 1.264688  
H 3.963911 -2.471082 -0.293956  
H 5.816369 0.688128 0.589056  
H 4.242684 0.867281 1.399582  
H 4.591220 1.790807 -0.076021  
H 4.635174 0.632021 -2.312687  
H 5.905800 -0.446492 -1.705573  
H 4.428291 -1.132755 -2.416182  
H -3.547460 1.391304 -2.844902  
H -4.264647 2.728988 -1.923111  
H -2.517588 2.701359 -2.213545  
H -3.887185 2.871778 0.625145  
H -2.152275 2.964773 0.251599  
H -2.741573 1.736792 1.378910  
H -4.159146 -0.201834 0.509928  
H -5.269136 0.988498 -0.196692  
H -4.578868 -0.289830 -1.218736

#### A1\_TRANS\_C

Inner Energy (Hartree) : -1422.442323  
Zero Point Energy (Hartree) : 0.592162  
Enthalpy (Hartree) : -1421.817681  
Entropy (Hartree) : 0.088295  
Gibbs Energy (Hartree) : -1421.905976  
Imaginary frequency (cm-1): -18.28  
N 0.121947 0.788546 -1.367972  
N -0.488937 -0.347710 -0.746815

|   |           |           |           |
|---|-----------|-----------|-----------|
| C | 0.252664  | -1.608906 | -0.533231 |
| C | -0.691229 | 2.030951  | -1.376814 |
| C | -1.224323 | 2.464184  | -0.023884 |
| C | 1.005356  | -1.883977 | 0.757884  |
| C | -2.539971 | 2.119442  | 0.304714  |
| C | -3.102611 | 2.463226  | 1.526887  |
| C | -2.346006 | 3.187179  | 2.443198  |
| C | -1.050148 | 3.563595  | 2.114003  |
| C | -0.467646 | 3.216576  | 0.890155  |
| C | 1.168695  | -1.031784 | 1.857923  |
| C | 1.929129  | -1.487318 | 2.942648  |
| C | 2.511605  | -2.748153 | 2.963807  |
| C | 2.328513  | -3.598525 | 1.878093  |
| C | 1.578476  | -3.159914 | 0.796257  |
| C | 0.948886  | 3.677602  | 0.633594  |
| C | 0.583870  | 0.352488  | 1.915766  |
| O | 2.239623  | -0.025476 | -1.120643 |
| C | 3.701883  | 0.089152  | -1.121645 |
| C | 4.225999  | 0.182734  | -2.552419 |
| C | 4.147695  | -1.217598 | -0.473073 |
| C | 4.120947  | 1.275762  | -0.256774 |
| C | 1.476038  | 0.965077  | -1.579537 |
| O | 1.906034  | 1.973914  | -2.117940 |
| O | -2.404911 | -1.378754 | -0.305620 |
| C | -3.722801 | -1.950912 | -0.571427 |
| C | -4.776753 | -0.846251 | -0.587804 |
| C | -3.926554 | -2.870923 | 0.628948  |
| C | -3.700970 | -2.754265 | -1.869824 |
| C | -1.800555 | -0.574404 | -1.187271 |
| O | -2.321582 | -0.082511 | -2.166789 |
| H | -0.507984 | -2.384589 | -0.608895 |
| H | 0.930002  | -1.762467 | -1.373950 |
| H | -0.036341 | 2.782525  | -1.807259 |
| H | -1.520983 | 1.889278  | -2.065206 |
| H | -3.135317 | 1.576852  | -0.423521 |
| H | -4.124489 | 2.176080  | 1.757101  |
| H | -2.765646 | 3.467548  | 3.404992  |
| H | -0.464388 | 4.143741  | 2.823689  |
| H | 2.062038  | -0.824570 | 3.794388  |
| H | 3.096389  | -3.064545 | 3.822423  |
| H | 2.767017  | -4.591881 | 1.870975  |
| H | 1.443089  | -3.820954 | -0.058221 |
| H | 0.996692  | 4.772649  | 0.631749  |
| H | 1.613296  | 3.328907  | 1.432521  |
| H | 1.359918  | 3.325696  | -0.313093 |
| H | 0.788961  | 0.822925  | 2.882021  |
| H | 1.019628  | 0.986787  | 1.140268  |
| H | -0.496504 | 0.353052  | 1.754561  |
| H | 5.319513  | 0.130082  | -2.537453 |
| H | 3.852375  | -0.658185 | -3.145939 |
| H | 3.923210  | 1.116079  | -3.027018 |
| H | 5.241222  | -1.260501 | -0.458224 |
| H | 3.774106  | -2.077431 | -1.037469 |
| H | 3.778067  | -1.292240 | 0.553082  |
| H | 3.656475  | 1.197556  | 0.732267  |
| H | 5.207769  | 1.260067  | -0.125835 |
| H | 3.835841  | 2.224216  | -0.713550 |
| H | -4.648799 | -0.191171 | -1.450902 |
| H | -5.773751 | -1.296301 | -0.632434 |
| H | -4.709975 | -0.250581 | 0.328501  |
| H | -4.900133 | -3.365244 | 0.558998  |
| H | -3.891092 | -2.298379 | 1.560542  |
| H | -3.146832 | -3.638035 | 0.662845  |
| H | -2.901086 | -3.501915 | -1.840421 |
| H | -4.653892 | -3.280459 | -1.984519 |
| H | -3.553906 | -2.108045 | -2.736597 |

#### B2\_GP2\_C

Inner Energy (Hartree) : -1651.062243  
 Zero Point Energy (Hartree) : 0.628644  
 Enthalpy (Hartree) : -1650.397480  
 Entropy (Hartree) : 0.096335  
 Gibbs Energy (Hartree) : -1650.493815  
 Minimum geometry  
 N 1.364116 -0.085071 -0.073496  
 N 1.714542 -1.316394 -0.589564  
 C 0.893341 -1.828792 -1.681155  
 C 0.728813 -0.058663 1.243507

|   |           |           |           |
|---|-----------|-----------|-----------|
| C | -0.740186 | 0.315049  | 1.246258  |
| C | -0.510276 | -2.098240 | -1.202115 |
| C | -1.282168 | 1.195487  | 0.344018  |
| C | -2.654717 | 1.543945  | 0.385545  |
| C | -3.486645 | 0.973489  | 1.386597  |
| C | -2.908590 | 0.066588  | 2.310014  |
| C | -1.577723 | -0.251213 | 2.240019  |
| C | -3.227332 | 2.442774  | -0.553071 |
| C | -4.559616 | 2.761498  | -0.495889 |
| C | -5.386644 | 2.195307  | 0.503951  |
| C | -4.861736 | 1.321324  | 1.420601  |
| C | -1.577835 | -1.390565 | -1.687217 |
| C | -2.886627 | -1.580007 | -1.170152 |
| C | -3.083535 | -2.521752 | -0.124976 |
| C | -1.965655 | -3.258321 | 0.350765  |
| C | -0.718266 | -3.052991 | -0.171885 |
| C | -3.995095 | -0.830897 | -1.640168 |
| C | -5.240101 | -1.005309 | -1.093595 |
| C | -5.436187 | -1.940855 | -0.051296 |
| C | -4.382897 | -2.682132 | 0.420521  |
| O | 1.735595  | 2.098315  | 0.079152  |
| C | 2.164779  | 3.422403  | -0.361159 |
| C | 1.566962  | 3.736741  | -1.730677 |
| C | 3.689338  | 3.501364  | -0.359111 |
| C | 1.568502  | 4.332128  | 0.708625  |
| C | 2.004872  | 1.001490  | -0.633667 |
| O | 2.687544  | 0.932210  | -1.637180 |
| O | 3.609835  | -1.071015 | 0.556344  |
| C | 5.050602  | -1.168812 | 0.767490  |
| C | 5.784755  | -0.869975 | -0.537642 |
| C | 5.405083  | -2.538099 | 1.340972  |
| C | 5.304878  | -0.065651 | 1.790807  |
| C | 2.999652  | -1.786550 | -0.392418 |
| O | 3.451729  | -2.746817 | -0.984069 |
| H | 0.897539  | -1.105193 | -2.504286 |
| H | 1.382267  | -2.741680 | -2.026054 |
| H | 0.851531  | -1.062790 | 1.654321  |
| H | 1.288195  | 0.627023  | 1.887685  |
| H | -0.663768 | 1.628811  | -0.435420 |
| H | -3.541995 | -0.388421 | 3.066936  |
| H | -1.155023 | -0.962574 | 2.945304  |
| H | -2.588537 | 2.875113  | -1.319853 |
| H | -4.986661 | 3.451001  | -1.218303 |
| H | -6.440707 | 2.454625  | 0.538554  |
| H | -5.494714 | 0.876675  | 2.184337  |
| H | -1.426725 | -0.640721 | -2.461002 |
| H | -2.116100 | -3.984512 | 1.145727  |
| H | 0.134595  | -3.610046 | 0.208280  |
| H | -3.837665 | -0.099997 | -2.428499 |
| H | -6.077894 | -0.413921 | -1.449175 |
| H | -6.426293 | -2.066660 | 0.376991  |
| H | -4.529575 | -3.401361 | 1.222563  |
| H | 0.477086  | 3.630206  | -1.701981 |
| H | 1.800161  | 4.772176  | -1.998322 |
| H | 1.970902  | 3.075678  | -2.498801 |
| H | 4.079475  | 3.220801  | 0.624809  |
| H | 4.000960  | 4.529487  | -0.569920 |
| H | 4.117742  | 2.840928  | -1.114601 |
| H | 1.811133  | 5.376123  | 0.488817  |
| H | 0.479972  | 4.222960  | 0.739129  |
| H | 1.970581  | 4.080739  | 1.694801  |
| H | 5.641527  | -1.670742 | -1.265024 |
| H | 5.414136  | 0.066307  | -0.966708 |
| H | 6.855596  | -0.765060 | -0.336115 |
| H | 4.825281  | -2.729875 | 2.249755  |
| H | 6.468519  | -2.559873 | 1.600976  |
| H | 5.201878  | -3.327885 | 0.616387  |
| H | 4.726549  | -0.245967 | 2.702303  |
| H | 6.366951  | -0.034622 | 2.051987  |
| H | 5.016397  | 0.907382  | 1.380846  |

#### B2\_CIS\_C

Inner Energy (Hartree) : -1651.004326  
 Zero Point Energy (Hartree) : 0.628506  
 Enthalpy (Hartree) : -1650.340546  
 Entropy (Hartree) : 0.095316  
 Gibbs Energy (Hartree) : -1650.435861  
 Imaginary frequency (cm-1): -39.72

```

N 0.164582 0.291308 0.439887
N -0.123293 0.005181 -0.928466
C 0.648858 -1.130060 -1.421955
C -0.067291 -0.877103 1.307726
C -1.333088 -1.683110 1.084956
C 2.129565 -1.020466 -1.132482
C -2.505774 -1.133429 0.628735
C -3.659111 -1.933539 0.424361
C -3.603807 -3.325993 0.707291
C -2.383041 -3.872733 1.181333
C -1.282116 -3.076426 1.355005
C -4.873679 -1.378462 -0.059535
C -5.977783 -2.168323 -0.250567
C -5.922024 -3.554635 0.032657
C -4.762973 -4.119121 0.499715
C 2.838231 -2.124861 -0.733485
C 4.238596 -2.063217 -0.503084
C 4.909991 -0.822661 -0.679925
C 4.152926 0.311040 -1.082296
C 2.806451 0.215647 -1.302724
C 4.986759 -3.198206 -0.095662
C 6.337655 -3.104758 0.124133
C 7.005886 -1.870087 -0.052301
C 6.307572 -0.756223 -0.444502
O 0.717411 2.108512 1.589434
C 0.586997 3.135563 2.629520
C 2.043209 3.466134 2.942410
C -0.107904 2.536220 3.849820
C -0.141736 4.361582 2.092232
C -0.336429 1.480843 1.086610
O -1.494429 1.766792 1.275816
O -0.840412 2.098272 -1.349080
C -1.692171 3.048790 -2.070091
C -3.051168 2.409763 -2.346781
C -0.991967 3.518525 -3.342999
C -1.838060 4.199484 -1.082235
C -0.603669 0.889685 -1.861476
O -0.761711 0.571615 -3.029240
H 0.247864 -2.059095 -1.002463
H 0.463465 -1.160092 -2.496260
H 0.800204 -1.540540 1.210124
H -0.031401 -0.498355 2.335295
H -2.562986 -0.069090 0.424981
H -2.329666 -4.937227 1.394685
H -0.349091 -3.514034 1.703496
H -4.910892 -0.314165 -0.277285
H -6.901219 -1.733838 -0.621608
H -6.803380 -4.169557 -0.123266
H -4.716078 -5.183340 0.716641
H 2.327213 -3.075449 -0.588868
H 4.662310 1.262768 -1.209549
H 2.239771 1.095441 -1.593725
H 4.470874 -4.145662 0.038478
H 6.900682 -3.979890 0.434534
H 8.075545 -1.808821 0.124353
H 6.817233 0.194211 -0.581076
H 2.548710 3.850994 2.051683
H 2.091649 4.226707 3.727455
H 2.575218 2.574002 3.285571
H -1.147574 2.283248 3.633845
H -0.090886 3.263529 4.667444
H 0.419571 1.636514 4.183805
H -0.095277 5.161262 2.838482
H 0.341175 4.718324 1.177697
H -1.187952 4.139968 1.880370
H -2.964032 1.577878 -3.047470
H -3.490971 2.048349 -1.411308
H -3.722944 3.160167 -2.775524
H 0.005350 3.901637 -3.103136
H -1.571146 4.330947 -3.794395
H -0.896007 2.705408 -4.062506
H -0.861242 4.635364 -0.853839
H -2.471980 4.978874 -1.515921
H -2.291453 3.847433 -0.152542

```

#### B2\_GP2\_CC

```

Inner Energy (Hartree) : -1651.062243
Zero Point Energy (Hartree) : 0.628644

```

```

Enthalpy (Hartree) : -1650.397480
Entropy (Hartree) : 0.096335
Gibbs Energy (Hartree) : -1650.493815
Minimum geometry
N 1.364116 -0.085071 -0.073496
N 1.714542 -1.316394 -0.589564
C 0.893341 -1.828792 -1.681155
C 0.728813 -0.058663 1.243507
C -0.740186 0.315049 1.246258
C -0.510276 -2.098240 -1.202115
C -1.282168 1.195487 0.344018
C -2.654717 1.543945 0.385545
C -3.486645 0.973489 1.386597
C -2.908590 0.066588 2.310014
C -1.577723 -0.251213 2.240019
C -3.227332 2.442774 -0.553071
C -4.559616 2.761498 -0.495889
C -5.386644 2.195307 0.503951
C -4.861737 1.321324 1.420601
C -1.577835 -1.390565 -1.687217
C -2.886627 -1.580007 -1.170152
C -3.083535 -2.521752 -0.124976
C -1.965655 -3.258321 0.350765
C -0.718266 -3.052991 -0.171885
C -3.995095 -0.830897 -1.640168
C -5.240101 -1.005309 -1.093595
C -5.436187 -1.940855 -0.051296
C -4.382897 -2.682132 0.420521
O 1.735595 2.098315 0.079152
C 2.164779 3.422403 -0.361159
C 1.566962 3.736741 -1.730677
C 3.689338 3.501364 -0.359111
C 1.568502 4.332128 0.708625
C 2.004872 1.001490 -0.633667
O 2.687544 0.932210 -1.637180
O 3.609835 -1.071015 0.556344
C 5.050602 -1.168812 0.767490
C 5.784755 -0.869975 -0.537642
C 5.405083 -2.538099 1.340972
C 5.304878 -0.065651 1.790807
C 2.999652 -1.786550 -0.392418
O 3.451729 -2.746817 -0.984069
H 0.897539 -1.105193 -2.504286
H 1.382267 -2.741680 -2.026054
H 0.851531 -1.062790 1.654321
H 1.288195 0.627023 1.887685
H -0.663768 1.628811 -0.435420
H -3.541995 -0.388421 3.066936
H -1.155023 -0.962574 2.945304
H -2.588537 2.875113 -1.319853
H -4.986661 3.451001 -1.218303
H -6.440707 2.454625 0.538554
H -5.494714 0.876675 2.184337
H -1.426725 -0.640721 -2.461002
H -2.116100 -3.984512 1.145727
H 0.134595 -3.610046 0.208280
H -3.837665 -0.099997 -2.428499
H -6.077894 -0.413921 -1.449175
H -6.426293 -2.066660 0.376991
H -4.529575 -3.401361 1.222563
H 0.477086 3.630206 -1.701981
H 1.800161 4.772176 -1.998322
H 1.970902 3.075678 -2.498801
H 4.079475 3.220801 0.624809
H 4.000960 4.529487 -0.569920
H 4.117742 2.840928 -1.114601
H 1.811133 5.376123 0.488817
H 0.479972 4.222960 0.739129
H 1.970581 4.080739 1.694801
H 5.641527 -1.670742 -1.265024
H 5.414136 0.066307 -0.966708
H 6.855596 -0.765059 -0.336115
H 4.825281 -2.729875 2.249755
H 6.468519 -2.559873 1.600976
H 5.201878 -3.327885 0.616387
H 4.726549 -0.245967 2.702303
H 6.366951 -0.034622 2.051987
H 5.016397 0.907382 1.380846

```

**B2\_CIS\_CC**

Inner Energy (Hartree) : -1651.011354  
Zero Point Energy (Hartree) : 0.627994  
Enthalpy (Hartree) : -1650.348197  
Entropy (Hartree) : 0.094117  
Gibbs Energy (Hartree) : -1650.442314  
Imaginary frequency (cm-1): -46.22

N 1.509386 0.636210 -1.680230  
N 1.130553 -0.603542 -1.071109  
C 0.434720 -1.484928 -2.028915  
C 0.353665 1.410144 -2.129821  
C -0.666040 1.719576 -1.053730  
C -1.070139 -1.409565 -1.862205  
C -0.387566 1.617983 0.284495  
C -1.397714 1.818886 1.259069  
C -2.708266 2.175402 0.840574  
C -2.963711 2.311143 -0.548332  
C -1.974601 2.079456 -1.465357  
C -1.147319 1.625349 2.643540  
C -2.150856 1.780515 3.565639  
C -3.453769 2.145452 3.148288  
C -3.723249 2.339880 1.817874  
C -1.615381 -1.335559 -0.604124  
C -3.011922 -1.214646 -0.413254  
C -3.865689 -1.185640 -1.550910  
C -3.284111 -1.288043 -2.840248  
C -1.924178 -1.394811 -2.990765  
C -3.581170 -1.085346 0.881138  
C -4.933889 -0.936851 1.037782  
C -5.785360 -0.911079 -0.093964  
C -5.264280 -1.032596 -1.356498  
O 3.334279 0.762276 -0.364647  
C 4.676158 1.246545 -0.022358  
C 5.150724 0.221271 0.998509  
C 4.587972 2.632546 0.611670  
C 5.559902 1.220338 -1.266145  
C 2.608338 1.376716 -1.298931  
O 2.848142 2.469516 -1.781389  
O 1.676312 -1.426555 0.936278  
C 1.969219 -2.568351 1.810422  
C 3.453797 -2.680933 2.135545  
C 1.434345 -3.832829 1.140661  
C 1.162267 -2.231180 3.060238  
C 2.094984 -1.379093 -0.324940  
O 2.997853 -2.018647 -0.805908  
H 0.743185 -1.246567 -3.053866  
H 0.769356 -2.511334 -1.847793  
H 0.764262 2.325576 -2.557831  
H -0.141928 0.874047 -2.945097  
H 0.597167 1.308211 0.621463  
H -3.968014 2.566099 -0.876104  
H -2.196161 2.142277 -2.527935  
H -0.145687 1.342503 2.958136  
H -1.949723 1.624860 4.621563  
H -4.239881 2.266438 3.887771  
H -4.725349 2.605311 1.490954  
H -0.958863 -1.305297 0.261474  
H -3.931711 -1.265013 -3.713088  
H -1.491425 -1.452994 -3.987096  
H -2.920365 -1.074191 1.744290  
H -5.356680 -0.821647 2.031155  
H -6.855981 -0.790782 0.043549  
H -5.915559 -1.008872 -2.226728  
H 5.138795 -0.782625 0.566405  
H 6.169592 0.459644 1.317956  
H 4.499070 0.234393 1.876976  
H 4.267756 3.380860 -0.113135  
H 5.572488 2.910453 1.002329  
H 3.879725 2.619750 1.446606  
H 6.589449 1.460598 -0.982396  
H 5.548708 0.221091 -1.712924  
H 5.223129 1.948150 -2.006163  
H 4.041268 -2.869816 1.236306  
H 3.814812 -1.768069 2.615654  
H 3.599939 -3.512278 2.833020  
H 0.382709 -3.700643 0.864324  
H 1.502926 -4.672808 1.838583

H 2.011277 -4.083022 0.247038  
H 0.099802 -2.130367 2.817993  
H 1.278333 -3.024109 3.805158  
H 1.510038 -1.289722 3.496467

**B2\_GP1**

Inner Energy (Hartree) : -1651.064743  
Zero Point Energy (Hartree) : 0.629201  
Enthalpy (Hartree) : -1650.399522  
Entropy (Hartree) : 0.096390  
Gibbs Energy (Hartree) : -1650.495912  
Minimum geometry

N -0.016928 -0.548321 -1.116680  
N 0.168987 0.815375 -1.196371  
C 1.242786 1.278216 -2.074026  
C -0.964678 -1.137474 -2.060663  
C -2.405088 -0.824369 -1.733995  
C 2.618194 1.083493 -1.484513  
C -3.117072 -1.628554 -0.878447  
C -4.448307 -1.309660 -0.509404  
C -5.050804 -0.134225 -1.039387  
C -4.301452 0.672866 -1.934920  
C -3.016072 0.337211 -2.269704  
C -5.189892 -2.113567 0.397111  
C -6.464008 -1.763588 0.762353  
C -7.063072 -0.593937 0.234627  
C -6.373901 0.199065 -0.646134  
C 3.328112 -0.065462 -1.726099  
C 4.591529 -0.291690 -1.121185  
C 5.133116 0.706071 -0.264052  
C 4.389440 1.897060 -0.045921  
C 3.163934 2.075913 -0.629095  
C 5.323427 -1.490403 -1.330699  
C 6.530757 -1.690994 -0.711893  
C 7.069334 -0.698294 0.141271  
C 6.387899 0.472198 0.356972  
O 1.153991 -0.543716 0.792285  
C 1.752918 -1.121828 1.993161  
C 2.524524 0.053867 2.582447  
C 2.709499 -2.250022 1.613969  
C 0.656383 -1.583786 2.950144  
C 0.402944 -1.278869 -0.021329  
O 0.103242 -2.451398 0.120019  
O -1.266513 1.053328 0.503544  
C -2.005504 1.767962 1.541243  
C -2.892832 2.839148 0.911965  
C -1.032465 2.344846 2.566682  
C -2.858536 0.667828 2.164214  
C -0.401526 1.682893 -0.284875  
O -0.119408 2.868107 -0.263936  
H 1.148969 0.724127 -3.013263  
H 1.050027 2.331307 -2.281015  
H -0.706994 -0.758933 -3.055594  
H -0.787005 -2.212572 -2.051071  
H -2.646405 -2.511210 -0.452297  
H -4.761668 1.567306 -2.347142  
H -2.447898 0.968133 -2.948574  
H -4.724751 -3.008297 0.802564  
H -7.020235 -2.382569 1.459889  
H -8.072791 -0.327756 0.532454  
H -6.830143 1.098121 -1.052604  
H 2.915918 -0.832744 -2.378484  
H 4.803259 2.661100 0.607299  
H 2.585399 2.974327 -0.435696  
H 4.905325 -2.251411 -1.984652  
H 7.079361 -2.613834 -0.874407  
H 8.026202 -0.868933 0.625347  
H 6.798170 1.236317 1.012299  
H 1.854346 0.896156 2.779823  
H 2.994881 -0.247378 3.523565  
H 3.301918 0.386440 1.889978  
H 2.170678 -3.100584 1.193890  
H 3.248363 -2.580126 2.508132  
H 3.443209 -1.892348 0.884871  
H 1.111205 -1.915857 3.888959  
H -0.023143 -0.755245 3.174333  
H 0.082537 -2.408222 2.524784  
H -2.295575 3.639030 0.471835



H -3.522322 2.391363 0.136694  
H -3.544082 3.265469 1.682024  
H -0.399469 1.550320 2.974468  
H -1.597283 2.789540 3.392301  
H -0.396994 3.111450 2.120881  
H -2.228012 -0.148165 2.530555  
H -3.429442 1.073683 3.005019  
H -3.557985 0.260546 1.429972

#### B2\_TRANS\_CC

Inner Energy (Hartree) : -1651.017942  
Zero Point Energy (Hartree) : 0.629255  
Enthalpy (Hartree) : -1650.353771  
Entropy (Hartree) : 0.094635  
Gibbs Energy (Hartree) : -1650.448406  
Imaginary frequency (cm-1): -17.05

N -1.170834 0.315227 2.306911  
N -0.108459 -0.320827 1.570195  
C 1.239814 0.249140 1.822710  
C -2.465114 -0.418199 2.309480  
C -2.956556 -0.736627 0.906553  
C 2.071355 0.382597 0.566278  
C -3.402220 0.271835 0.082341  
C -3.799449 0.016744 -1.253421  
C -3.752814 -1.316744 -1.746586  
C -3.321817 -2.347697 -0.873300  
C -2.935786 -2.066494 0.411990  
C -4.240286 1.055886 -2.116518  
C -4.608596 0.783053 -3.408171  
C -4.559008 -0.544505 -3.900122  
C -4.143201 -1.568304 -3.088805  
C 3.439125 0.412248 0.665833  
C 4.262215 0.548593 -0.483462  
C 3.647655 0.644972 -1.762064  
C 2.229583 0.604754 -1.838772  
C 1.464646 0.479662 -0.711534  
C 5.678961 0.579883 -0.397783  
C 6.447043 0.702890 -1.527586  
C 5.835175 0.799186 -2.800073  
C 4.468356 0.770105 -2.912977  
O -0.511222 2.177604 1.144240  
C -0.525306 3.603293 0.795895  
C 0.660165 3.732992 -0.154536  
C -0.304108 4.452765 2.044905  
C -1.830100 3.938244 0.077240  
C -1.384832 1.674004 2.010292  
O -2.291089 2.292460 2.536264  
O 0.798930 -2.119476 0.702294  
C 1.362784 -3.463674 0.658287  
C 0.256872 -4.480085 0.385504  
C 2.119552 -3.750678 1.952359  
C 2.324974 -3.366515 -0.522741  
C -0.037126 -1.722723 1.656508  
O -0.600350 -2.443607 2.453673  
H 1.107133 1.224945 2.283484  
H 1.776208 -0.368355 2.554652  
H -2.356476 -1.317191 2.906476  
H -3.153310 0.255918 2.815662  
H -3.460014 1.292556 0.452113  
H -3.297832 -3.371182 -1.239190  
H -2.598750 -2.865646 1.064602  
H -4.279392 2.072621 -1.733323  
H -4.941695 1.584351 -4.060939  
H -4.854341 -0.747184 -4.925244  
H -4.106330 -2.588404 -3.462591  
H 3.918584 0.319996 1.639175  
H 1.755667 0.670183 -2.815103  
H 0.383067 0.434975 -0.772849  
H 6.146668 0.504910 0.580829  
H 7.529956 0.726509 -1.449881  
H 6.453915 0.895844 -3.687202  
H 3.994068 0.842896 -3.888501  
H 0.514916 3.117821 -1.046198  
H 0.768715 4.777451 -0.462386  
H 1.586014 3.412255 0.332562  
H -1.141830 4.369999 2.737875  
H -0.192885 5.500772 1.749083  
H 0.615116 4.144252 2.554187

H -1.770129 4.954092 -0.326313  
H -1.984904 3.246180 -0.757506  
H -2.682528 3.878869 0.755628  
H -0.409114 -4.578522 1.244291  
H -0.330266 -4.168940 -0.484656  
H 0.703958 -5.456054 0.170333  
H 2.874475 -2.976203 2.125656  
H 2.631484 -4.714403 1.868044  
H 1.443261 -3.790956 2.808560  
H 3.067245 -2.581936 -0.345359  
H 2.842112 -4.320424 -0.664199  
H 1.780398 -3.122247 -1.439605

#### B2\_TRANS\_C

Inner Energy (Hartree) : -1651.020100  
Zero Point Energy (Hartree) : 0.629558  
Enthalpy (Hartree) : -1650.355827  
Entropy (Hartree) : 0.093484  
Gibbs Energy (Hartree) : -1650.449311  
Imaginary frequency (cm-1): -12.73

N -0.113079 0.781193 -1.725594  
N -1.083102 -0.011327 -2.433694  
C -2.525048 0.363819 -2.316805  
C 1.277670 0.353355 -1.950861  
C 2.045405 0.047357 -0.680797  
C -3.109086 0.019960 -0.958696  
C 3.342727 -0.388794 -0.779375  
C 4.116523 -0.679301 0.374524  
C 3.531834 -0.501335 1.658766  
C 2.189782 -0.045190 1.735151  
C 1.467556 0.215163 0.601806  
C 5.456408 -1.142168 0.288233  
C 6.177855 -1.414586 1.422101  
C 5.595308 -1.237518 2.700295  
C 4.303704 -0.791331 2.814310  
C -2.942064 0.841346 0.131957  
C -3.400894 0.464367 1.419328  
C -4.063718 -0.782905 1.584188  
C -4.251522 -1.605487 0.443619  
C -3.786219 -1.217828 -0.785959  
C -3.207947 1.297308 2.553957  
C -3.649970 0.907419 3.791561  
C -4.310479 -0.334928 3.955066  
C -4.513199 -1.158566 2.877848  
O 0.853412 2.653067 -1.083527  
C 0.908731 3.934026 -0.386973  
C -0.048042 3.924056 0.804186  
C 0.618428 5.074651 -1.358261  
C 2.357339 3.974301 0.092602  
C -0.301887 2.133197 -1.520158  
O -1.331230 2.770122 -1.663962  
O -0.236612 -1.758061 -1.183367  
C 0.034486 -3.174891 -0.888982  
C -1.273861 -3.909826 -0.606201  
C 0.888656 -3.118185 0.372577  
C 0.822151 -3.785316 -2.044501  
C -0.981881 -1.412989 -2.223704  
O -1.577273 -2.168463 -2.963087  
H -2.624519 1.415732 -2.552145  
H -3.010339 -0.220084 -3.098509  
H 1.256783 -0.524357 -2.596035  
H 1.804009 1.132676 -2.508013  
H 3.801265 -0.520815 -1.758316  
H 1.732879 0.081483 2.713449  
H 0.431368 0.527009 0.672891  
H 5.901937 -1.277357 -0.694148  
H 7.201561 -1.768352 1.343946  
H 6.177194 -1.457556 3.590278  
H 3.851590 -0.654511 3.793432  
H -2.453614 1.803011 0.012436  
H -4.768389 -2.554949 0.558236  
H -3.923415 -1.867415 -1.645417  
H -2.700482 2.249844 2.422043  
H -3.496395 1.550187 4.653246  
H -4.656652 -0.631902 4.940586  
H -5.020369 -2.112267 3.000255  
H 0.132271 3.039804 1.424939  
H 0.129450 4.813787 1.416490

|   |           |           |           |
|---|-----------|-----------|-----------|
| H | -1.090243 | 3.930224  | 0.479442  |
| H | 1.290607  | 5.016035  | -2.220239 |
| H | 0.787848  | 6.032505  | -0.855478 |
| H | -0.413596 | 5.036723  | -1.709639 |
| H | 2.544168  | 4.902879  | 0.640478  |
| H | 2.563693  | 3.125068  | 0.751263  |
| H | 3.043384  | 3.927818  | -0.758629 |
| H | -1.843757 | -3.378169 | 0.162172  |
| H | -1.887468 | -3.996618 | -1.502872 |
| H | -1.043090 | -4.913461 | -0.234572 |
| H | 1.837131  | -2.608737 | 0.185495  |
| H | 1.100206  | -4.137808 | 0.709271  |
| H | 0.361773  | -2.588292 | 1.170790  |
| H | 1.731293  | -3.202253 | -2.227981 |
| H | 1.120327  | -4.804640 | -1.779512 |
| H | 0.226000  | -3.822703 | -2.957890 |

### C3\_GP2\_C

Inner Energy (Hartree) : -1651.065527  
 Zero Point Energy (Hartree) : 0.629674  
 Enthalpy (Hartree) : -1650.400030  
 Entropy (Hartree) : 0.095356  
 Gibbs Energy (Hartree) : -1650.495386  
 Minimum geometry

|   |           |           |           |
|---|-----------|-----------|-----------|
| N | 0.901868  | 0.515003  | -0.464272 |
| N | 0.901870  | -0.515351 | 0.463940  |
| C | 0.292097  | -0.224960 | 1.764192  |
| C | 0.291990  | 0.224664  | -1.764485 |
| C | -1.201147 | 0.034479  | -1.723867 |
| C | -1.201031 | -0.034682 | 1.723669  |
| C | -1.722226 | -1.218504 | -1.933034 |
| C | -3.116305 | -1.443782 | -1.958660 |
| C | -3.978728 | -0.398543 | -1.773714 |
| C | -3.487108 | 0.913735  | -1.547450 |
| C | -2.082562 | 1.140383  | -1.517864 |
| C | -2.082528 | -1.140533 | 1.517744  |
| C | -3.487060 | -0.913813 | 1.547498  |
| C | -3.978586 | 0.398491  | 1.773805  |
| C | -3.116087 | 1.443678  | 1.958685  |
| C | -1.722023 | 1.218325  | 1.932914  |
| C | -4.370597 | -2.005543 | 1.344686  |
| C | -4.370564 | 2.005510  | -1.344524 |
| C | -3.888854 | 3.268366  | -1.118527 |
| C | -2.493930 | 3.495586  | -1.089783 |
| C | -1.613573 | 2.461583  | -1.285613 |
| C | -1.613636 | -2.461754 | 1.285420  |
| C | -2.494071 | -3.495701 | 1.089653  |
| C | -3.888980 | -3.268414 | 1.118590  |
| O | 2.612792  | 1.340061  | 0.716175  |
| C | 3.698511  | 2.259392  | 1.044817  |
| C | 4.233816  | 1.677427  | 2.349717  |
| C | 3.142886  | 3.664337  | 1.262603  |
| C | 4.767593  | 2.215884  | -0.044437 |
| C | 1.884152  | 1.487195  | -0.391165 |
| O | 2.007931  | 2.363384  | -1.227397 |
| O | 2.612843  | -1.340353 | -0.716479 |
| C | 3.699269  | -2.259038 | -1.044587 |
| C | 3.144662  | -3.664439 | -1.262013 |
| C | 4.768099  | -2.214419 | 0.044871  |
| C | 4.234446  | -1.677127 | -2.349562 |
| C | 1.884175  | -1.487530 | 0.390833  |
| O | 2.008200  | -2.363497 | 1.227256  |
| H | 0.565752  | -1.057478 | 2.413705  |
| H | 0.766174  | 0.675751  | 2.168458  |
| H | 0.565644  | 1.057170  | -2.414012 |
| H | 0.765984  | -0.676074 | -2.168783 |
| H | -1.047160 | -2.058337 | -2.076533 |
| H | -3.494372 | -2.449792 | -2.108801 |
| H | -5.053596 | -0.560434 | -1.782063 |
| H | -5.053445 | 0.560435  | 1.782292  |
| H | -3.494090 | 2.449704  | 2.108877  |
| H | -1.046896 | 2.058109  | 2.076427  |
| H | -5.441565 | -1.819334 | 1.368019  |
| H | -5.441545 | 1.819355  | -1.367716 |
| H | -4.574162 | 4.096454  | -0.962898 |
| H | -2.116856 | 4.498802  | -0.913309 |
| H | -0.546145 | 2.657519  | -1.259636 |
| H | -0.546222 | -2.657746 | 1.259319  |

|   |           |           |           |
|---|-----------|-----------|-----------|
| H | -2.117071 | -4.498933 | 0.913111  |
| H | -4.574349 | -4.096465 | 0.963027  |
| H | 4.575817  | 0.648746  | 2.199174  |
| H | 5.075428  | 2.277284  | 2.708749  |
| H | 3.454503  | 1.674391  | 3.118032  |
| H | 3.939073  | 4.315818  | 1.636784  |
| H | 2.340561  | 3.641242  | 2.007495  |
| H | 2.753873  | 4.082436  | 0.333046  |
| H | 4.394329  | 2.629525  | -0.982125 |
| H | 5.637349  | 2.797029  | 0.278097  |
| H | 5.089975  | 1.183286  | -0.214781 |
| H | 3.941378  | -4.315503 | -1.635792 |
| H | 2.755728  | -4.082474 | -0.332394 |
| H | 2.342484  | -3.642153 | -2.007087 |
| H | 4.394936  | -2.628001 | 0.982626  |
| H | 5.089718  | -1.181535 | 0.214921  |
| H | 5.638326  | -2.795067 | -0.277285 |
| H | 5.076540  | -2.276524 | -2.708233 |
| H | 3.455289  | -1.674868 | -3.118038 |
| H | 4.575711  | -0.648165 | -2.199267 |

### C3\_CIS\_C

Inner Energy (Hartree) : -1651.000315  
 Zero Point Energy (Hartree) : 0.628665  
 Enthalpy (Hartree) : -1650.336649  
 Entropy (Hartree) : 0.093697  
 Gibbs Energy (Hartree) : -1650.430346  
 Imaginary frequency (cm-1): -32.57

|   |           |           |           |
|---|-----------|-----------|-----------|
| N | 0.771509  | 0.249985  | -0.079590 |
| N | 0.534190  | -1.024879 | 0.535205  |
| C | -0.552475 | -0.968435 | 1.533797  |
| C | -0.197192 | 0.505639  | -1.182652 |
| C | -1.492796 | 1.215645  | -0.851607 |
| C | -1.985892 | -1.160419 | 1.080851  |
| C | -2.618267 | 0.783517  | -1.512723 |
| C | -3.857832 | 1.443454  | -1.382653 |
| C | -3.965689 | 2.540691  | -0.573678 |
| C | -2.831584 | 3.032442  | 0.122948  |
| C | -1.570124 | 2.380752  | -0.022204 |
| C | -2.410454 | -2.187419 | 0.179609  |
| C | -3.795277 | -2.271686 | -0.156065 |
| C | -4.725317 | -1.394126 | 0.457952  |
| C | -4.300567 | -0.456125 | 1.358379  |
| C | -2.926864 | -0.335116 | 1.651652  |
| C | -4.227816 | -3.247076 | -1.093126 |
| C | -2.932622 | 4.181831  | 0.950852  |
| C | -1.836076 | 4.683968  | 1.601010  |
| C | -0.581880 | 4.052072  | 1.447198  |
| C | -0.450626 | 2.933720  | 0.662226  |
| C | -1.522319 | -3.133432 | -0.404556 |
| C | -1.974896 | -4.068651 | -1.300836 |
| C | -3.339583 | -4.120251 | -1.663718 |
| O | 2.559209  | 1.596734  | -0.136061 |
| C | 3.461497  | 2.501978  | -0.861118 |
| C | 3.595249  | 3.669470  | 0.111202  |
| C | 2.771577  | 2.945752  | -2.148920 |
| C | 4.814205  | 1.853827  | -1.126820 |
| C | 2.069513  | 0.495890  | -0.693262 |
| O | 2.508834  | -0.078430 | -1.658534 |
| O | 2.767338  | -1.440420 | 0.666593  |
| C | 3.926768  | -2.343876 | 0.670096  |
| C | 3.715708  | -3.447309 | -0.362723 |
| C | 4.159909  | -2.885290 | 2.078125  |
| C | 5.069396  | -1.428633 | 0.250914  |
| C | 1.544078  | -1.910335 | 0.879264  |
| O | 1.281546  | -2.997975 | 1.364956  |
| H | -0.320339 | -1.742496 | 2.268264  |
| H | -0.471131 | 0.007675  | 2.023903  |
| H | 0.324532  | 1.138302  | -1.909324 |
| H | -0.410601 | -0.440687 | -1.692809 |
| H | -2.560561 | -0.104771 | -2.136096 |
| H | -4.724252 | 1.059406  | -1.911863 |
| H | -4.917130 | 3.052526  | -0.454023 |
| H | -5.777489 | -1.480357 | 0.198856  |
| H | -5.008043 | 0.222163  | 1.824901  |
| H | -2.603202 | 0.454891  | 2.324382  |
| H | -5.284436 | -3.290983 | -1.345641 |
| H | -3.902645 | 4.661807  | 1.054650  |

H -1.926768 5.564500 2.230183  
H 0.288086 4.451855 1.960907  
H 0.514839 2.453229 0.576205  
H -0.480880 -3.137382 -0.112045  
H -1.277737 -4.783038 -1.728804  
H -3.682278 -4.861316 -2.379849  
H 4.028158 3.332402 1.057788  
H 4.246649 4.437326 -0.316707  
H 2.615884 4.114687 0.312367  
H 3.371875 3.721492 -2.633953  
H 1.785096 3.365838 -1.925002  
H 2.659186 2.113291 -2.847701  
H 4.722474 1.023117 -1.827557  
H 5.488197 2.602478 -1.555810  
H 5.255500 1.490780 -0.194693  
H 4.640675 -4.023102 -0.467883  
H 2.915697 -4.126409 -0.063429  
H 3.469347 -3.005458 -1.333221  
H 3.348810 -3.544373 2.387700  
H 4.240666 -2.058753 2.791534  
H 5.101081 -3.444687 2.094527  
H 6.007808 -1.991043 0.241010  
H 4.887172 -1.025389 -0.747552  
H 5.169936 -0.597352 0.955390

### C3\_GP2\_CC

Inner Energy (Hartree) : -1651.055976  
Zero Point Energy (Hartree) : 0.629470  
Enthalpy (Hartree) : -1650.390522  
Entropy (Hartree) : 0.095861  
Gibbs Energy (Hartree) : -1650.486383  
Minimum geometry

N 0.764177 1.817732 -0.299079  
N 0.533751 0.453835 -0.139220  
C 0.116279 0.110927 1.233673  
C -0.004532 2.527236 -1.328980  
C -1.467481 2.175398 -1.310689  
C -0.288085 -1.315783 1.526428  
C -2.015274 1.544602 -2.401570  
C -3.388130 1.210068 -2.448372  
C -4.198268 1.491542 -1.381585  
C -3.676429 2.138676 -0.230227  
C -2.300083 2.502291 -0.194092  
C -1.378921 -1.958661 0.861663  
C -1.731072 -3.286943 1.238064  
C -1.013443 -3.935757 2.278473  
C 0.016523 -3.294880 2.910388  
C 0.377559 -1.983776 2.524883  
C -2.790901 -3.943275 0.559691  
C -4.503440 2.437784 0.884010  
C -3.996436 3.077207 1.984996  
C -2.634199 3.453570 2.017709  
C -1.808364 3.175474 0.957975  
C -2.118769 -1.332393 -0.175166  
C -3.138132 -1.993947 -0.813161  
C -3.477884 -3.315461 -0.446880  
O 2.748977 1.387538 0.639850  
C 4.203106 1.455291 0.744842  
C 4.531539 0.153114 1.469742  
C 4.615770 2.667356 1.574562  
C 4.813588 1.464811 -0.654406  
C 2.052691 2.282707 -0.065054  
C 2.433961 3.375155 -0.432181  
O 1.372457 -1.585174 -0.544283  
C 1.744275 -2.695513 -1.417500  
C 1.621211 -3.901230 -0.491684  
C 3.182287 -2.529268 -1.903359  
C 0.741911 -2.788103 -2.565023  
C 1.268176 -0.345400 -1.003023  
O 1.724013 0.083712 -2.047452  
H 0.926792 0.390001 1.914958  
H -0.729513 0.774526 1.440025  
H 0.145031 3.592814 -1.141630  
H 0.418481 2.300932 -2.312847  
H -1.376790 1.288888 -3.242693  
H -3.789147 0.718072 -3.329330  
H -5.251623 1.224587 -1.400000  
H -1.295837 -4.946947 2.559712

H 0.567178 -3.788778 3.705257  
H 1.211260 -1.498873 3.025859  
H -3.047175 -4.958105 0.853422  
H -5.550781 2.149605 0.847347  
H -4.637720 3.299512 2.832370  
H -2.239744 3.966947 2.889406  
H -0.762638 3.460160 1.003515  
H -1.864531 -0.322981 -0.476050  
H -3.687438 -1.492792 -1.603688  
H -4.284838 -3.828558 -0.961547  
H 4.161469 -0.702725 0.896416  
H 5.614017 0.054548 1.594558  
H 4.063367 0.135636 2.459168  
H 5.696853 2.639958 1.746184  
H 4.112829 2.649762 2.546912  
H 4.361549 3.595349 1.060322  
H 4.591651 2.398344 -1.174922  
H 5.900036 1.355700 -0.578089  
H 4.415697 0.631474 -1.242104  
H 1.895703 -4.812675 -1.031810  
H 2.284897 -3.790750 0.371180  
H 0.595787 -4.001972 -0.125939  
H 3.855451 -2.391156 -1.050476  
H 3.277162 -1.673036 -2.571840  
H 3.490334 -3.434455 -2.437113  
H 0.938935 -3.692085 -3.150014  
H -0.277303 -2.845737 -2.167991  
H 0.819396 -1.921980 -3.225867

### C3\_CIS\_CC

Inner Energy (Hartree) : -1650.996204  
Zero Point Energy (Hartree) : 0.630731  
Enthalpy (Hartree) : -1650.331221  
Entropy (Hartree) : 0.091404  
Gibbs Energy (Hartree) : -1650.422625  
Imaginary frequency (cm-1): -18.34

N 0.258267 0.487489 -0.796335  
N 0.142646 0.160450 0.596109  
C 1.093650 -0.863545 1.101356  
C 0.554014 -0.638689 -1.706354  
C -0.221401 -1.923831 -1.457922  
C 2.541129 -0.960715 0.616143  
C 0.498026 -3.091650 -1.353305  
C -0.110561 -4.315925 -0.998243  
C -1.447976 -4.353253 -0.712279  
C -2.245290 -3.188434 -0.861406  
C -1.644170 -1.971368 -1.300000  
C 3.426925 0.112022 0.265565  
C 4.772634 -0.208559 -0.099754  
C 5.217334 -1.554812 -0.082704  
C 4.364095 -2.558087 0.283294  
C 3.030526 -2.250234 0.621650  
C 5.667399 0.829495 -0.471818  
C -3.640128 -3.222279 -0.597404  
C -4.423614 -2.116952 -0.800928  
C -3.847084 -0.937869 -1.324068  
C -2.500026 -0.869623 -1.571647  
C 3.052799 1.483625 0.251176  
C 3.943973 2.462440 -0.108180  
C 5.266881 2.138560 -0.479359  
O -1.416620 2.031055 -0.595411  
C -2.038900 3.314198 -0.944965  
C -2.841912 3.662937 0.302796  
C -2.964088 3.121332 -2.143917  
C -0.961949 4.367992 -1.192310  
C -0.490638 1.501967 -1.383190  
O -0.312445 1.799821 -2.552969  
O -0.487089 0.757925 2.720596  
C -1.736913 0.003286 2.919822  
C -1.942319 0.120567 4.426754  
C -1.620904 -1.462759 2.511150  
C -2.860942 0.688609 2.154854  
C -0.054771 1.201000 1.523282  
O 0.206440 2.369542 1.359604  
H 1.111524 -0.706522 2.180268  
H 0.645109 -1.844541 0.945215  
H 0.354627 -0.238314 -2.700609  
H 1.621614 -0.861187 -1.669514

|   |           |           |           |
|---|-----------|-----------|-----------|
| H | 1.573872  | -3.063917 | -1.498946 |
| H | 0.497520  | -5.211595 | -0.916065 |
| H | -1.922153 | -5.275362 | -0.386865 |
| H | 6.245313  | -1.771029 | -0.361187 |
| H | 4.697614  | -3.590991 | 0.305763  |
| H | 2.365311  | -3.066175 | 0.892906  |
| H | 6.683228  | 0.560471  | -0.749775 |
| H | -4.078005 | -4.150679 | -0.239887 |
| H | -5.488958 | -2.153540 | -0.595033 |
| H | -4.478903 | -0.083287 | -1.547240 |
| H | -2.100097 | 0.020421  | -2.037872 |
| H | 2.052082  | 1.783375  | 0.522633  |
| H | 3.622459  | 3.499608  | -0.106688 |
| H | 5.959605  | 2.924177  | -0.765666 |
| H | -2.184316 | 3.705987  | 1.175200  |
| H | -3.320025 | 4.638078  | 0.168934  |
| H | -3.623017 | 2.918509  | 0.482222  |
| H | -3.530257 | 4.042544  | -2.316814 |
| H | -3.678437 | 2.315957  | -1.941196 |
| H | -2.398188 | 2.877721  | -3.043548 |
| H | -0.394747 | 4.155425  | -2.099494 |
| H | -1.439523 | 5.347059  | -1.300499 |
| H | -0.277664 | 4.404030  | -0.339960 |
| H | -2.867839 | -0.385656 | 4.717761  |
| H | -1.108853 | -0.342293 | 4.964120  |
| H | -2.007565 | 1.171171  | 4.722928  |
| H | -0.777992 | -1.949041 | 3.011148  |
| H | -1.518081 | -1.570759 | 1.429780  |
| H | -2.536819 | -1.981132 | 2.813098  |
| H | -3.806480 | 0.176395  | 2.359936  |
| H | -2.953918 | 1.732245  | 2.466805  |
| H | -2.681495 | 0.653854  | 1.076630  |

### C3\_GP1

Inner Energy (Hartree) : -1651.069164  
 Zero Point Energy (Hartree) : 0.630236  
 Enthalpy (Hartree) : -1650.403362  
 Entropy (Hartree) : 0.094309  
 Gibbs Energy (Hartree) : -1650.497671  
 Minimum geometry

|   |           |           |           |
|---|-----------|-----------|-----------|
| N | -0.196269 | -0.658601 | 1.027873  |
| N | 0.196170  | 0.657942  | 1.028202  |
| C | 1.200813  | 1.046842  | 2.013436  |
| C | -1.200963 | -1.048002 | 2.012874  |
| C | -2.520580 | -0.338190 | 1.815367  |
| C | 2.520491  | 0.337249  | 1.815513  |
| C | -2.788854 | 0.781647  | 2.564013  |
| C | -3.991937 | 1.507753  | 2.406075  |
| C | -4.925190 | 1.090859  | 1.496552  |
| C | -4.692849 | -0.062907 | 0.699967  |
| C | -3.474644 | -0.786644 | 0.847684  |
| C | 3.474508  | 0.786315  | 0.848061  |
| C | 4.692792  | 0.062786  | 0.699961  |
| C | 4.925261  | -1.091368 | 1.495946  |
| C | 3.992055  | -1.508839 | 2.405251  |
| C | 2.788889  | -0.782953 | 2.563568  |
| C | 5.652955  | 0.503377  | -0.248110 |
| C | -5.653055 | -0.502893 | -0.248341 |
| C | -5.420293 | -1.610095 | -1.022959 |
| C | -4.208397 | -2.323318 | -0.884989 |
| C | -3.259636 | -1.923329 | 0.022427  |
| C | 3.259398  | 1.923428  | 0.023418  |
| C | 4.208126  | 2.324007  | -0.883773 |
| C | 5.420090  | 1.610975  | -1.022130 |
| O | 1.146480  | -0.962367 | -0.728780 |
| C | 1.779527  | -1.709212 | -1.812994 |
| C | 2.638390  | -0.651148 | -2.496876 |
| C | 0.709235  | -2.232052 | -2.768703 |
| C | 2.656112  | -2.820355 | -1.240874 |
| C | 0.305394  | -1.555820 | 0.110468  |
| O | -0.023750 | -2.730871 | 0.107139  |
| O | -1.146537 | 0.962621  | -0.728325 |
| C | -1.779314 | 1.709935  | -1.812371 |
| C | -0.708797 | 2.232892  | -2.767764 |
| C | -2.655791 | 2.821040  | -1.240013 |
| C | -2.638252 | 0.652240  | -2.496731 |
| C | -0.305467 | 1.555635  | 0.111245  |
| O | 0.023628  | 2.730703  | 0.108578  |

|   |           |           |           |
|---|-----------|-----------|-----------|
| H | 1.293640  | 2.130470  | 1.950707  |
| H | 0.814122  | 0.811478  | 3.011986  |
| H | -1.293883 | -2.131584 | 1.949514  |
| H | -0.814255 | -0.813249 | 3.011560  |
| H | -2.059487 | 1.120439  | 3.295862  |
| H | -4.168901 | 2.391006  | 3.011858  |
| H | -5.856846 | 1.636023  | 1.368954  |
| H | 5.856979  | -1.636359 | 1.368071  |
| H | 4.169120  | -2.392386 | 3.010576  |
| H | 2.059556  | -1.122213 | 3.295235  |
| H | 6.579039  | -0.056639 | -0.350167 |
| H | -6.579080 | 0.057272  | -0.350104 |
| H | -6.161389 | -1.938037 | -1.745649 |
| H | -4.022867 | -3.192556 | -1.508798 |
| H | -2.326363 | -2.472821 | 0.090947  |
| H | 2.326085  | 2.472811  | 0.092232  |
| H | 4.022513  | 3.193566  | -1.507108 |
| H | 6.161155  | 1.939378  | -1.744642 |
| H | 3.413556  | -0.283735 | -1.820596 |
| H | 3.119296  | -1.082784 | -3.380251 |
| H | 2.024665  | 0.198014  | -2.812603 |
| H | 1.191440  | -2.696479 | -3.634869 |
| H | 0.088520  | -1.403201 | -3.125570 |
| H | 0.070880  | -2.971016 | -2.282401 |
| H | 2.053324  | -3.599979 | -0.773072 |
| H | 3.247102  | -3.265453 | -2.048148 |
| H | 3.344335  | -2.405394 | -0.497236 |
| H | -1.190797 | 2.697676  | -3.633853 |
| H | -0.070368 | 2.971602  | -2.281175 |
| H | -0.088184 | 1.404039  | -3.124799 |
| H | -2.052936 | 3.600443  | -0.771931 |
| H | -3.344133 | 2.405958  | -0.496552 |
| H | -3.246655 | 3.266442  | -2.047212 |
| H | -3.118950 | 1.084247  | -3.380036 |
| H | -2.024615 | -0.196917 | -2.812645 |
| H | -3.413582 | 0.284730  | -1.820692 |

### C3\_TRANS\_CC

Inner Energy (Hartree) : -1651.004840  
 Zero Point Energy (Hartree) : 0.629336  
 Enthalpy (Hartree) : -1650.340567  
 Entropy (Hartree) : 0.093636  
 Gibbs Energy (Hartree) : -1650.434203  
 Imaginary frequency (cm-1): -20.25

|   |           |           |           |
|---|-----------|-----------|-----------|
| N | -0.982004 | 1.201237  | -0.977189 |
| N | 0.287393  | 0.576040  | -1.338253 |
| C | 1.458448  | 1.022963  | -0.541630 |
| C | -2.108181 | 0.645339  | -1.752121 |
| C | -2.859092 | -0.552605 | -1.192570 |
| C | 2.653712  | 0.126411  | -0.787393 |
| C | -3.083228 | -1.602901 | -2.052275 |
| C | -3.876165 | -2.713110 | -1.689816 |
| C | -4.427742 | -2.777850 | -0.440219 |
| C | -4.216555 | -1.728212 | 0.491759  |
| C | -3.443959 | -0.587910 | 0.115687  |
| C | 3.525125  | -0.255765 | 0.283669  |
| C | 4.655459  | -1.075296 | -0.012423 |
| C | 4.894174  | -1.489577 | -1.348393 |
| C | 4.052662  | -1.101304 | -2.354697 |
| C | 2.936936  | -0.285070 | -2.069309 |
| C | 5.519241  | -1.483674 | 1.038063  |
| C | -4.767185 | -1.800713 | 1.798528  |
| C | -4.580701 | -0.786135 | 2.699905  |
| C | -3.847503 | 0.360135  | 2.320037  |
| C | -3.298591 | 0.458911  | 1.066520  |
| C | 3.320332  | 0.123608  | 1.639946  |
| C | 4.171384  | -0.290098 | 2.633485  |
| C | 5.286125  | -1.104568 | 2.333366  |
| O | 0.014765  | 3.188414  | -0.444335 |
| C | 0.038667  | 4.501877  | 0.201436  |
| C | 1.535351  | 4.752584  | 0.369237  |
| C | -0.648647 | 4.429946  | 1.562819  |
| C | -0.585919 | 5.548313  | -0.717008 |
| C | -1.126404 | 2.540667  | -0.656352 |
| O | -2.234052 | 3.046990  | -0.551285 |
| O | 0.184707  | -1.200766 | 0.123283  |
| C | 0.298897  | -2.597893 | 0.574685  |
| C | 0.437019  | -2.435959 | 2.084137  |

|   |           |           |           |
|---|-----------|-----------|-----------|
| C | 1.546855  | -3.239755 | -0.024761 |
| C | -0.967162 | -3.364702 | 0.219761  |
| C | 0.136363  | -0.869787 | -1.154515 |
| O | 0.026992  | -1.608616 | -2.099513 |
| H | 1.715254  | 2.025668  | -0.868305 |
| H | 1.196307  | 1.067803  | 0.517168  |
| H | -2.814807 | 1.466102  | -1.879440 |
| H | -1.712519 | 0.381445  | -2.737836 |
| H | -2.625535 | -1.586513 | -3.037033 |
| H | -4.029400 | -3.516355 | -2.403939 |
| H | -5.028093 | -3.632777 | -0.140063 |
| H | 5.755054  | -2.119687 | -1.555485 |
| H | 4.234099  | -1.417082 | -3.377318 |
| H | 2.271475  | 0.006974  | -2.875376 |
| H | 6.372934  | -2.109910 | 0.791993  |
| H | -5.343939 | -2.681372 | 2.069890  |
| H | -5.004575 | -0.853328 | 3.697445  |
| H | -3.723521 | 1.176766  | 3.025338  |
| H | -2.777174 | 1.363671  | 0.787073  |
| H | 2.478263  | 0.751148  | 1.907513  |
| H | 3.986928  | 0.012258  | 3.659994  |
| H | 5.951976  | -1.425760 | 3.128432  |
| H | 2.037841  | 4.749483  | -0.603057 |
| H | 1.698980  | 5.726190  | 0.840675  |
| H | 1.988466  | 3.980432  | 0.999245  |
| H | -0.484387 | 5.370168  | 2.098668  |
| H | -0.221438 | 3.616868  | 2.159446  |
| H | -1.722358 | 4.269249  | 1.457633  |
| H | -1.654578 | 5.371851  | -0.843095 |
| H | -0.437970 | 6.543363  | -0.284729 |
| H | -0.101938 | 5.525446  | -1.698605 |
| H | 0.520752  | -3.419979 | 2.555473  |
| H | 1.332163  | -1.854659 | 2.327115  |
| H | -0.440199 | -1.925450 | 2.493904  |
| H | 2.442801  | -2.674930 | 0.244133  |
| H | 1.478744  | -3.303898 | -1.112178 |
| H | 1.645696  | -4.253236 | 0.377400  |
| H | -0.905574 | -4.370405 | 0.648614  |
| H | -1.845564 | -2.865912 | 0.635413  |
| H | -1.089486 | -3.449978 | -0.860572 |

### C3\_TRANS\_C

Inner Energy (Hartree) : -1651.008937  
 Zero Point Energy (Hartree) : 0.629596  
 Enthalpy (Hartree) : -1650.344638  
 Entropy (Hartree) : 0.092438  
 Gibbs Energy (Hartree) : -1650.437076  
 Imaginary frequency (cm-1): -7.17

|   |           |           |           |
|---|-----------|-----------|-----------|
| N | 0.090383  | 0.016751  | 1.208424  |
| N | 0.232120  | 1.410873  | 1.524896  |
| C | 1.585682  | 1.977457  | 1.603421  |
| C | -1.044203 | -0.632488 | 1.920943  |
| C | -2.343758 | -0.904984 | 1.188720  |
| C | 2.639536  | 1.545247  | 0.580026  |
| C | -3.494574 | -0.745777 | 1.925071  |
| C | -4.757019 | -1.155180 | 1.440212  |
| C | -4.858455 | -1.730353 | 0.203249  |
| C | -3.704468 | -1.891335 | -0.607992 |
| C | -2.428425 | -1.474549 | -0.123604 |
| C | 2.423250  | 1.234033  | -0.805279 |
| C | 3.558780  | 0.929489  | -1.620896 |
| C | 4.864554  | 0.969958  | -1.070649 |
| C | 5.046294  | 1.269638  | 0.251597  |
| C | 3.929008  | 1.536560  | 1.066895  |
| C | 3.374856  | 0.577499  | -2.985656 |
| C | -3.812175 | -2.436676 | -1.914237 |
| C | -2.712335 | -2.555025 | -2.723117 |
| C | -1.449801 | -2.130704 | -2.252576 |
| C | -1.309723 | -1.609141 | -0.990690 |
| C | 1.143873  | 1.178702  | -1.428838 |
| C | 0.999247  | 0.829741  | -2.746694 |
| C | 2.125491  | 0.523297  | -3.541960 |
| O | 1.408429  | -1.684157 | 0.659143  |
| C | 2.400144  | -2.754779 | 0.785549  |
| C | 2.169783  | -3.549454 | -0.496158 |
| C | 2.089948  | -3.593980 | 2.021137  |
| C | 3.803209  | -2.158370 | 0.811105  |
| C | 1.256191  | -0.744224 | 1.575546  |

|   |           |           |           |
|---|-----------|-----------|-----------|
| O | 1.913493  | -0.590746 | 2.577730  |
| O | -1.689584 | 1.703096  | 0.346283  |
| C | -2.722702 | 2.518632  | -0.310361 |
| C | -2.070779 | 3.509224  | -1.274887 |
| C | -3.587487 | 3.198650  | 0.746932  |
| C | -3.540567 | 1.498861  | -1.092842 |
| C | -0.728123 | 2.297481  | 1.049443  |
| O | -0.653362 | 3.491195  | 1.281731  |
| H | 1.427596  | 3.053271  | 1.520973  |
| H | 1.991081  | 1.780530  | 2.595446  |
| H | -0.681754 | -1.608096 | 2.266923  |
| H | -1.249335 | -0.047083 | 2.824099  |
| H | -3.434427 | -0.306092 | 2.917727  |
| H | -5.638651 | -1.013988 | 2.058087  |
| H | -5.821137 | -2.056040 | -0.182013 |
| H | 5.712028  | 0.747870  | -1.713798 |
| H | 6.042024  | 1.289841  | 0.683595  |
| H | 4.093436  | 1.742009  | 2.121279  |
| H | 4.254628  | 0.346513  | -3.580954 |
| H | -4.792070 | -2.749483 | -2.266173 |
| H | -2.809469 | -2.966417 | -3.723557 |
| H | -0.577970 | -2.208971 | -2.896226 |
| H | -0.338807 | -1.270345 | -0.661377 |
| H | 0.247888  | 1.368803  | -0.861482 |
| H | 0.002306  | 0.776720  | -3.174838 |
| H | 1.997819  | 0.246881  | -4.584230 |
| H | 2.358940  | -2.919022 | -1.370723 |
| H | 2.845904  | -4.408943 | -0.529740 |
| H | 1.137477  | -3.909494 | -0.544870 |
| H | 2.759272  | -4.459514 | 2.047749  |
| H | 1.058787  | -3.960752 | 1.982966  |
| H | 2.232532  | -3.017132 | 2.937118  |
| H | 3.977939  | -1.586383 | 1.723304  |
| H | 4.537371  | -2.968757 | 0.754900  |
| H | 3.948365  | -1.498064 | -0.048993 |
| H | -2.854726 | 4.006059  | -1.855372 |
| H | -1.490623 | 4.265734  | -0.747342 |
| H | -1.414547 | 2.979545  | -1.974185 |
| H | -3.021812 | 3.947829  | 1.302108  |
| H | -3.976907 | 2.449524  | 1.444166  |
| H | -4.437287 | 3.686594  | 0.258477  |
| H | -4.287040 | 2.024640  | -1.696501 |
| H | -2.898913 | 0.914514  | -1.759264 |
| H | -4.060754 | 0.814530  | -0.420089 |

### D4\_GP2\_C

Inner Energy (Hartree) : -1036.647928  
 Zero Point Energy (Hartree) : 0.435667  
 Enthalpy (Hartree) : -1036.185469  
 Entropy (Hartree) : 0.077988  
 Gibbs Energy (Hartree) : -1036.263457  
 Minimum geometry

|   |           |           |           |
|---|-----------|-----------|-----------|
| N | 1.051665  | 0.406244  | 0.558162  |
| N | 1.051685  | -0.405884 | -0.558358 |
| C | 1.793096  | 0.033398  | -1.731587 |
| C | 1.793069  | -0.032982 | 1.731420  |
| C | 3.145845  | 0.604796  | 1.895698  |
| C | 3.146071  | -0.604019 | -1.895629 |
| C | 3.648789  | -1.566938 | -1.132444 |
| C | 3.648506  | 1.567740  | 1.132508  |
| O | -0.640480 | 1.483975  | -0.422452 |
| C | -1.750027 | 2.426718  | -0.522405 |
| C | -2.285661 | 2.153357  | -1.924808 |
| C | -1.227107 | 3.856374  | -0.407222 |
| C | -2.810382 | 2.110889  | 0.530367  |
| C | 0.073827  | 1.371584  | 0.700002  |
| O | -0.061584 | 2.016858  | 1.720846  |
| O | -0.640197 | -1.483931 | 0.422350  |
| C | -1.749285 | -2.427195 | 0.522494  |
| C | -2.284843 | -2.154056 | 1.924967  |
| C | -1.225740 | -3.856621 | 0.407272  |
| C | -2.809921 | -2.111865 | -0.530144 |
| C | 0.073936  | -1.371310 | -0.700191 |
| O | -0.061290 | -2.016751 | -1.720956 |
| H | 1.180691  | -0.173815 | -2.614901 |
| H | 1.893636  | 1.121087  | -1.661884 |
| H | 1.180512  | 0.173923  | 2.614703  |
| H | 1.893935  | -1.120630 | 1.661567  |

|   |           |           |           |
|---|-----------|-----------|-----------|
| H | 3.723472  | 0.219518  | 2.735066  |
| H | 3.723795  | -0.218505 | -2.734822 |
| H | 4.633690  | -1.981831 | -1.321646 |
| H | 3.092322  | -1.974584 | -0.293156 |
| H | 4.633266  | 1.982889  | 1.321882  |
| H | 3.092128  | 1.975154  | 0.293049  |
| H | -3.137552 | 2.807352  | -2.133828 |
| H | -1.510751 | 2.338873  | -2.674806 |
| H | -2.612529 | 1.112695  | -2.014640 |
| H | -2.043167 | 4.559528  | -0.602476 |
| H | -0.439232 | 4.031190  | -1.147102 |
| H | -0.828290 | 4.048365  | 0.590144  |
| H | -3.105132 | 1.058442  | 0.465908  |
| H | -2.442194 | 2.313506  | 1.536713  |
| H | -3.697047 | 2.725944  | 0.346278  |
| H | -1.509744 | -2.339222 | 2.674857  |
| H | -2.612165 | -1.113543 | 2.014845  |
| H | -3.136411 | -2.808431 | 2.134112  |
| H | -2.041456 | -4.560135 | 0.602666  |
| H | -0.437679 | -4.031063 | 1.147044  |
| H | -0.826981 | -4.048461 | -0.590147 |
| H | -3.696283 | -2.727318 | -0.345929 |
| H | -3.105142 | -1.059549 | -0.465672 |
| H | -2.441775 | -2.314336 | -1.536536 |

#### D4\_CIS\_C

Inner Energy (Hartree) : -1036.599730  
 Zero Point Energy (Hartree) : 0.436374  
 Enthalpy (Hartree) : -1036.138095  
 Entropy (Hartree) : 0.074447  
 Gibbs Energy (Hartree) : -1036.212543

Imaginary frequency (cm-1): -37.83

|   |           |           |           |
|---|-----------|-----------|-----------|
| N | -0.169355 | 1.244542  | -0.207359 |
| N | 1.265714  | 1.092642  | -0.288879 |
| C | 1.881321  | 2.200158  | -1.027226 |
| C | -0.477471 | 2.417198  | 0.649478  |
| C | -1.778486 | 3.075688  | 0.281360  |
| C | 2.736290  | 3.117860  | -0.195564 |
| C | 3.007439  | 2.964757  | 1.096028  |
| C | -2.470737 | 2.880199  | -0.837505 |
| O | -1.835233 | -0.237534 | -0.501587 |
| C | -3.066119 | -0.927654 | -0.089833 |
| C | -3.883685 | -0.920567 | -1.377503 |
| C | -3.771430 | -0.123644 | 1.000615  |
| C | -2.769165 | -2.351917 | 0.360006  |
| C | -0.918477 | 0.133142  | 0.376432  |
| O | -0.807369 | -0.249055 | 1.514968  |
| O | 1.172174  | -1.172805 | -0.204448 |
| C | 1.792913  | -2.483007 | 0.022879  |
| C | 0.599586  | -3.379945 | 0.321576  |
| C | 2.719268  | -2.410872 | 1.234568  |
| C | 2.510114  | -2.951787 | -1.241084 |
| C | 1.941478  | -0.101112 | -0.394209 |
| O | 3.134236  | -0.118114 | -0.647604 |
| H | 2.497225  | 1.781373  | -1.829208 |
| H | 1.070435  | 2.757685  | -1.509087 |
| H | -0.465051 | 2.135710  | 1.711073  |
| H | 0.321164  | 3.152097  | 0.529984  |
| H | -2.127878 | 3.801784  | 1.014057  |
| H | 3.160634  | 3.954984  | -0.748408 |
| H | 3.645363  | 3.664788  | 1.626339  |
| H | 2.604051  | 2.127230  | 1.658914  |
| H | -3.385022 | 3.433546  | -1.030982 |
| H | -2.150391 | 2.156775  | -1.580148 |
| H | -4.840665 | -1.425040 | -1.213427 |
| H | -4.079979 | 0.106333  | -1.700250 |
| H | -3.347034 | -1.441712 | -2.175977 |
| H | -4.757768 | -0.562317 | 1.181712  |
| H | -3.903627 | 0.914350  | 0.682342  |
| H | -3.209619 | -0.139054 | 1.936391  |
| H | -2.256849 | -2.906641 | -0.430367 |
| H | -2.153626 | -2.356493 | 1.260482  |
| H | -3.713571 | -2.861140 | 0.578190  |
| H | 0.051752  | -3.008728 | 1.191093  |
| H | -0.078076 | -3.411206 | -0.535867 |
| H | 0.944798  | -4.397536 | 0.527805  |
| H | 3.065473  | -3.419202 | 1.483144  |
| H | 2.176184  | -2.010421 | 2.096696  |

|   |          |           |           |
|---|----------|-----------|-----------|
| H | 3.588293 | -1.782575 | 1.034998  |
| H | 2.837315 | -3.987943 | -1.104726 |
| H | 1.826145 | -2.918731 | -2.095423 |
| H | 3.378326 | -2.329123 | -1.456412 |

#### D4\_GP2\_CC

Inner Energy (Hartree) : -1036.647470  
 Zero Point Energy (Hartree) : 0.435849  
 Enthalpy (Hartree) : -1036.184630  
 Entropy (Hartree) : 0.078898  
 Gibbs Energy (Hartree) : -1036.263528

#### Minimum geometry

|   |           |           |           |
|---|-----------|-----------|-----------|
| N | 0.488917  | 1.524618  | -0.347744 |
| N | -0.459426 | 0.711060  | 0.242869  |
| C | -0.752097 | 0.923502  | 1.661625  |
| C | 0.015519  | 2.409808  | -1.414475 |
| C | -1.116849 | 3.268262  | -0.939661 |
| C | -2.053141 | 1.639531  | 1.893293  |
| C | -2.182316 | 2.713183  | 2.666275  |
| C | -2.297833 | 3.330543  | -1.546345 |
| O | 1.968977  | 0.051486  | 0.450074  |
| C | 3.160350  | -0.790319 | 0.404014  |
| C | 2.842708  | -1.861766 | 1.443315  |
| C | 4.390191  | 0.016792  | 0.811082  |
| C | 3.298873  | -1.413413 | -0.983294 |
| C | 1.790615  | 1.044518  | -0.424047 |
| O | 2.628166  | 1.528000  | -1.157885 |
| O | -1.672852 | -1.149119 | 0.272135  |
| C | -2.167804 | -2.436101 | -0.209720 |
| C | -3.095827 | -2.877630 | 0.918193  |
| C | -1.006684 | -3.415750 | -0.367219 |
| C | -2.948552 | -2.244193 | -1.507809 |
| C | -0.796379 | -0.433612 | -0.441337 |
| O | -0.356263 | -0.708915 | -1.542213 |
| H | -0.765957 | -0.053813 | 2.152848  |
| H | 0.084493  | 1.492186  | 2.073323  |
| H | 0.873919  | 3.021853  | -1.700404 |
| H | -0.282514 | 1.813822  | -2.285777 |
| H | -0.926746 | 3.860568  | -0.046360 |
| H | -2.919490 | 1.210462  | 1.393317  |
| H | -3.146391 | 3.185796  | 2.829483  |
| H | -1.326451 | 3.159366  | 3.168817  |
| H | -3.088277 | 3.982833  | -1.187162 |
| H | -2.515256 | 2.732784  | -2.428896 |
| H | 3.676438  | -2.565985 | 1.521715  |
| H | 2.676093  | -1.407716 | 2.425055  |
| H | 1.942967  | -2.415500 | 1.156935  |
| H | 5.255918  | -0.649856 | 0.882312  |
| H | 4.232156  | 0.480434  | 1.790289  |
| H | 4.604200  | 0.796677  | 0.078955  |
| H | 2.352848  | -1.878280 | -1.278400 |
| H | 3.569258  | -0.664771 | -1.729586 |
| H | 4.076699  | -2.183302 | -0.959259 |
| H | -2.542049 | -2.973569 | 1.857185  |
| H | -3.900680 | -2.150063 | 1.060693  |
| H | -3.541460 | -3.847085 | 0.675913  |
| H | -1.399983 | -4.410561 | -0.599900 |
| H | -0.439976 | -3.482159 | 0.567564  |
| H | -0.336090 | -3.106656 | -1.170351 |
| H | -3.423840 | -3.189776 | -1.788064 |
| H | -3.733508 | -1.493808 | -1.368311 |
| H | -2.291628 | -1.925371 | -2.318025 |

#### D4\_CIS\_CC

Inner Energy (Hartree) : -1036.601422  
 Zero Point Energy (Hartree) : 0.435936  
 Enthalpy (Hartree) : -1036.139910  
 Entropy (Hartree) : 0.075422  
 Gibbs Energy (Hartree) : -1036.215333

#### Imaginary frequency (cm-1): -59.66

|   |          |           |           |
|---|----------|-----------|-----------|
| N | 1.582035 | 0.241255  | -0.187315 |
| N | 0.778080 | -0.937382 | -0.047638 |
| C | 1.431962 | -1.891107 | 0.878942  |
| C | 2.887082 | -0.060998 | -0.774044 |
| C | 2.783828 | -0.905841 | -2.013420 |
| C | 1.893080 | -1.310171 | 2.188238  |
| C | 3.123848 | -1.479703 | 2.662121  |
| C | 3.544114 | -1.972133 | -2.242086 |

|   |           |           |           |
|---|-----------|-----------|-----------|
| O | -0.204939 | 1.617851  | -0.191720 |
| C | -0.826533 | 2.921165  | 0.065313  |
| C | -2.288841 | 2.564712  | 0.297820  |
| C | -0.685219 | 3.823169  | -1.158625 |
| C | -0.223624 | 3.538259  | 1.325182  |
| C | 1.120967  | 1.526618  | -0.318816 |
| O | 1.874258  | 2.462452  | -0.536836 |
| O | -1.354735 | -1.327969 | -0.593490 |
| C | -2.712912 | -1.825028 | -0.340170 |
| C | -3.096567 | -2.424727 | -1.689455 |
| C | -3.662018 | -0.694222 | 0.035919  |
| C | -2.653557 | -2.906499 | 0.736680  |
| C | -0.606197 | -0.814328 | 0.371860  |
| O | -0.980045 | -0.481544 | 1.471043  |
| H | 0.696947  | -2.687103 | 1.046028  |
| H | 2.267772  | -2.357165 | 0.346880  |
| H | 3.332319  | 0.908480  | -1.001729 |
| H | 3.525914  | -0.543630 | -0.026678 |
| H | 2.056369  | -0.576531 | -2.753460 |
| H | 1.153356  | -0.741782 | 2.745832  |
| H | 3.428502  | -1.071433 | 3.621177  |
| H | 3.875061  | -2.041786 | 2.109335  |
| H | 3.477012  | -2.534615 | -3.168324 |
| H | 4.271546  | -2.317931 | -1.509709 |
| H | -2.856899 | 3.470606  | 0.530106  |
| H | -2.717601 | 2.108749  | -0.598754 |
| H | -2.382843 | 1.862691  | 1.129922  |
| H | -1.283226 | 4.728342  | -1.008693 |
| H | -1.060541 | 3.308863  | -2.049353 |
| H | 0.354380  | 4.105523  | -1.323632 |
| H | -0.298474 | 2.832942  | 2.159147  |
| H | 0.823288  | 3.805944  | 1.174857  |
| H | -0.782311 | 4.442558  | 1.586695  |
| H | -3.085294 | -1.655572 | -2.467470 |
| H | -2.396565 | -3.216359 | -1.972273 |
| H | -4.103082 | -2.850265 | -1.634418 |
| H | -4.678326 | -1.094335 | 0.112127  |
| H | -3.657742 | 0.079559  | -0.736298 |
| H | -3.388308 | -0.248284 | 0.992431  |
| H | -3.638183 | -3.374296 | 0.833406  |
| H | -1.933149 | -3.682256 | 0.456715  |
| H | -2.373522 | -2.489342 | 1.706075  |

#### D4\_GP1

Inner Energy (Hartree) : -1036.652089  
 Zero Point Energy (Hartree) : 0.436487  
 Enthalpy (Hartree) : -1036.188985  
 Entropy (Hartree) : 0.077455  
 Gibbs Energy (Hartree) : -1036.266440

#### Minimum geometry

|   |           |           |           |
|---|-----------|-----------|-----------|
| N | -0.196659 | -1.384108 | 0.660979  |
| N | 0.196675  | -1.384151 | -0.660913 |
| C | -0.551599 | -2.249437 | -1.569702 |
| C | 0.551636  | -2.249318 | 1.569820  |
| C | 1.906004  | -1.703834 | 1.927468  |
| C | -1.905965 | -1.703995 | -1.927422 |
| C | -3.050277 | -2.320044 | -1.647991 |
| C | 3.050315  | -2.319900 | 1.648071  |
| O | -1.440350 | 0.412146  | 0.193413  |
| C | -2.368204 | 1.502578  | 0.462852  |
| C | -2.619236 | 2.072625  | -0.930252 |
| C | -1.705322 | 2.543098  | 1.362462  |
| C | -3.661407 | 0.951712  | 1.059408  |
| C | -0.989697 | -0.374726 | 1.168864  |
| O | -1.221853 | -0.269718 | 2.359046  |
| O | 1.440346  | 0.412129  | -0.193436 |
| C | 2.368172  | 1.502574  | -0.462914 |
| C | 2.619213  | 2.072651  | 0.930176  |
| C | 1.705259  | 2.543065  | -1.362534 |
| C | 3.661377  | 0.951719  | -1.059477 |
| O | 0.989718  | -0.374802 | -1.168852 |
| O | 1.221872  | -0.269850 | -2.359039 |
| H | 0.063772  | -2.366107 | -2.464296 |
| H | -0.645527 | -3.228075 | -1.088147 |
| H | -0.063718 | -2.365920 | 2.464436  |
| H | 0.645561  | -3.227993 | 1.088341  |
| H | 1.903199  | -0.746495 | 2.444331  |
| H | -1.903157 | -0.746705 | -2.444375 |

|   |           |           |           |
|---|-----------|-----------|-----------|
| H | -4.009994 | -1.899773 | -1.935175 |
| H | -3.069928 | -3.273029 | -1.123220 |
| H | 4.010034  | -1.899596 | 1.935197  |
| H | 3.069963  | -3.272933 | 1.123387  |
| H | -3.286583 | 2.937343  | -0.866180 |
| H | -1.678473 | 2.389528  | -1.391111 |
| H | -3.084677 | 1.319669  | -1.573563 |
| H | -2.365124 | 3.410788  | 1.463972  |
| H | -0.762580 | 2.879525  | 0.918388  |
| H | -1.504114 | 2.133926  | 2.353489  |
| H | -4.053889 | 0.152218  | 0.422491  |
| H | -3.496240 | 0.557512  | 2.063195  |
| H | -4.407744 | 1.750982  | 1.111444  |
| H | 1.678449  | 2.389543  | 1.391042  |
| H | 3.084676  | 1.319715  | 1.573495  |
| H | 3.286541  | 2.937381  | 0.866080  |
| H | 2.365050  | 3.410760  | -1.464080 |
| H | 0.762523  | 2.879494  | -0.918447 |
| H | 1.504034  | 2.133868  | -2.353547 |
| H | 4.407703  | 1.750997  | -1.111525 |
| H | 4.053874  | 0.152235  | -0.422556 |
| H | 3.496208  | 0.557508  | -2.063259 |

#### D4\_TRANS\_CC

Inner Energy (Hartree) : -1036.608293  
 Zero Point Energy (Hartree) : 0.435993  
 Enthalpy (Hartree) : -1036.146715  
 Entropy (Hartree) : 0.075745  
 Gibbs Energy (Hartree) : -1036.222460  
 Imaginary frequency (cm-1): -25.76

|   |           |           |           |
|---|-----------|-----------|-----------|
| N | 0.627912  | 1.106756  | -0.715585 |
| N | -0.284948 | 0.048059  | -0.351364 |
| C | 0.039754  | -1.327372 | -0.797766 |
| C | 0.176515  | 2.453083  | -0.279013 |
| C | -0.192404 | 2.478346  | 1.180239  |
| C | 0.268583  | -2.302419 | 0.322277  |
| C | 0.084896  | -2.056019 | 1.613452  |
| C | -1.375663 | 2.874325  | 1.640434  |
| O | 2.357053  | -0.282272 | -0.124549 |
| C | 3.767295  | -0.640365 | 0.050105  |
| C | 4.533778  | -0.436412 | -1.254863 |
| C | 3.698762  | -2.123858 | 0.399763  |
| C | 4.359328  | 0.156524  | 1.209919  |
| C | 2.002567  | 0.943806  | -0.491913 |
| O | 2.773947  | 1.871481  | -0.657079 |
| O | -2.349630 | -0.611174 | 0.060003  |
| C | -3.800733 | -0.686042 | -0.069563 |
| C | -4.133481 | -1.939637 | 0.734982  |
| C | -4.194958 | -0.864503 | -1.534136 |
| C | -4.443787 | 0.547243  | 0.561463  |
| C | -1.641649 | 0.342403  | -0.550365 |
| O | -2.107731 | 1.280323  | -1.162578 |
| H | -0.788594 | -1.697689 | -1.412242 |
| H | 0.905717  | -1.287717 | -1.456924 |
| H | 1.031313  | 3.100742  | -0.466381 |
| H | -0.650654 | 2.777504  | -0.901580 |
| H | 0.585505  | 2.158577  | 1.874074  |
| H | 0.588174  | -3.290666 | -0.007261 |
| H | 0.256396  | -2.821563 | 2.364183  |
| H | -0.241621 | -1.077152 | 1.952244  |
| H | -1.591361 | 2.909600  | 2.704427  |
| H | -2.170181 | 3.179643  | 0.963812  |
| H | 5.541565  | -0.849960 | -1.145697 |
| H | 4.034955  | -0.966873 | -2.072923 |
| H | 4.612179  | 0.620238  | -1.511131 |
| H | 4.709082  | -2.506646 | 0.573666  |
| H | 3.247542  | -2.693244 | -0.419149 |
| H | 3.097831  | -2.281357 | 1.298859  |
| H | 4.413719  | 1.219112  | 0.970574  |
| H | 3.748233  | 0.021605  | 2.108287  |
| H | 5.368409  | -0.210734 | 1.423205  |
| H | -3.624793 | -2.811724 | 0.313050  |
| H | -3.813853 | -1.822928 | 1.774809  |
| H | -5.212584 | -2.119826 | 0.717851  |
| H | -5.272968 | -1.043398 | -1.599603 |
| H | -3.679280 | -1.730597 | -1.962579 |
| H | -3.952170 | 0.022229  | -2.121699 |
| H | -5.528182 | 0.405138  | 0.613263  |

H -4.065104 0.688322 1.578933  
H -4.231953 1.444167 -0.021876

#### D4\_TRANS\_C

Inner Energy (Hartree) : -1036.602635  
Zero Point Energy (Hartree) : 0.436273  
Enthalpy (Hartree) : -1036.140756  
Entropy (Hartree) : 0.075644  
Gibbs Energy (Hartree) : -1036.216400

Imaginary frequency (cm-1): -40.72

N -0.416928 -0.585655 -0.214906

N 0.066457 0.647947 -0.805014

C -0.352946 1.883768 -0.067741

C 0.306658 -1.827957 -0.555599

C 0.880243 -2.502465 0.659004

C -0.000385 1.867649 1.393501

C 0.786515 2.772721 1.969355

C 0.905659 -3.820187 0.830236

O -2.525383 0.271603 -0.365135

C -3.968175 0.272567 -0.118806

C -4.362701 1.703964 -0.473482

C -4.249090 -0.012527 1.354480

C -4.657737 -0.721016 -1.050419

C -1.782792 -0.803239 -0.101693

O -2.215078 -1.893645 0.226591

O 2.182368 0.040029 -0.072366

C 3.651636 0.074646 -0.062881

C 4.008561 -0.900135 1.054420

C 4.126143 1.483941 0.282992

C 4.192452 -0.420074 -1.401518

C 1.485229 0.767256 -0.937093

O 1.942458 1.549919 -1.738742

H 0.155084 2.700851 -0.582116

H -1.420513 2.014910 -0.211533

H -0.386335 -2.504406 -1.060504

H 1.092549 -1.584342 -1.271199

H 1.296745 -1.836753 1.409520

H -0.431329 1.063977 1.987476

H 1.004388 2.745155 3.033266

H 1.236898 3.581857 1.397831

H 1.353384 -4.268632 1.712118

H 0.475404 -4.500913 0.098783

H -5.444123 1.828928 -0.363950

H -3.864415 2.419584 0.188432

H -4.088451 1.933133 -1.507672

H -5.315548 0.134347 1.553186

H -3.684584 0.680767 1.987140

H -3.979124 -1.035981 1.617606

H -4.387336 -0.512566 -2.090547

H -4.376578 -1.746190 -0.807751

H -5.743038 -0.616692 -0.950425

H 3.560532 -0.580387 2.000442

H 3.652581 -1.907694 0.821105

H 5.095142 -0.933095 1.178381

H 5.209633 1.470201 0.438643

H 3.647126 1.822840 1.207123

H 3.893321 2.188303 -0.516340

H 5.281687 -0.507872 -1.337576

H 3.785097 -1.410117 -1.632473

H 3.944560 0.268025 -2.210830

#### E5\_GP2\_C

Inner Energy (Hartree) : -1491.864232  
Zero Point Energy (Hartree) : 0.495369  
Enthalpy (Hartree) : -1491.336652  
Entropy (Hartree) : 0.089011  
Gibbs Energy (Hartree) : -1491.425663

Minimum geometry

N -0.489087 -1.690363 0.084655

N -0.109554 -0.363565 0.122230

C -0.537775 0.392035 1.235727

C 0.524102 -2.682329 0.013847

C 1.881266 -2.265258 0.491588

C -0.684386 1.861097 1.046395

O 0.309016 -3.776309 -0.445390

O -0.844748 -0.167609 2.266917

C 2.972789 -2.624362 -0.300935

C 4.261454 -2.292678 0.101214

C 4.462914 -1.620062 1.304816  
C 3.374652 -1.282092 2.106956  
C 2.082633 -1.598495 1.701758  
C -1.206707 2.393779 -0.134219  
C -1.379635 3.766953 -0.255345  
C -1.018703 4.610371 0.794681  
C -0.508374 4.076834 1.976195  
C -0.355282 2.700961 2.109046  
O -2.512845 -0.864754 -0.413567  
C -3.981872 -0.834888 -0.416168  
C -4.516848 -1.729748 -1.530097  
C -4.284454 0.631541 -0.705282  
C -4.501606 -1.229205 0.963748  
C -1.860704 -1.983831 -0.111705  
O -2.318161 -3.086715 0.030627  
O 1.418290 1.107324 -0.551108  
C 2.313556 1.837107 -1.456138  
C 1.544512 2.335328 -2.675821  
C 3.481131 0.927443 -1.822953  
C 2.762720 3.003643 -0.583040  
C 0.709246 0.071108 -0.948390  
O 0.750926 -0.517709 -2.000876  
H 2.799556 -3.152195 -1.232937  
H 5.108023 -2.560624 -0.523106  
H 5.469793 -1.364686 1.621452  
H 3.531723 -0.771859 3.052140  
H 1.232878 -1.340797 2.326330  
H -1.488652 1.732507 -0.948028  
H -1.795462 4.179608 -1.169261  
H -1.144398 5.684129 0.694596  
H -0.234718 4.732463 2.796723  
H 0.029331 2.270756 3.028037  
H -4.070225 -1.448674 -2.489077  
H -4.301169 -2.780246 -1.331824  
H -5.601313 -1.599910 -1.604571  
H -5.367309 0.782665 -0.743504  
H -3.859416 0.930744 -1.668649  
H -3.869977 1.274539 0.077037  
H -5.578920 -1.041390 1.008456  
H -4.323205 -2.285196 1.171751  
H -4.012207 -0.626559 1.735587  
H 0.683139 2.933410 -2.362139  
H 2.203461 2.971860 -3.274513  
H 1.201039 1.507748 -3.298623  
H 3.146466 0.085406 -2.432126  
H 3.956182 0.538385 -0.916909  
H 4.222986 1.499508 -2.389286  
H 3.453895 3.641043 -1.142386  
H 1.899604 3.602639 -0.274692  
H 3.271794 2.636870 0.313235

#### E5\_CIS\_C

Inner Energy (Hartree) : -1491.824034  
Zero Point Energy (Hartree) : 0.494831  
Enthalpy (Hartree) : -1491.297964  
Entropy (Hartree) : 0.086789  
Gibbs Energy (Hartree) : -1491.384752

Imaginary frequency (cm-1): -25.83

N 1.105283 -0.076068 0.184123

N -0.285635 -0.384375 0.178175

C -0.519625 -1.666125 -0.376914

C 1.865407 -1.096908 0.908716

C 3.202008 -1.412749 0.355800

C -1.919957 -2.158287 -0.241656

O 1.379399 -1.644464 1.865416

O 0.369853 -2.336740 -0.854875

C 4.125066 -2.039074 1.194851

C 5.378518 -2.387916 0.707462

C 5.704511 -2.126395 -0.621775

C 4.776423 -1.516355 -1.464203

C 3.526495 -1.155947 -0.977773

C -2.524810 -2.782028 -1.333554

C -3.808104 -3.301020 -1.207417

C -4.471588 -3.228405 0.016691

C -3.854050 -2.632574 1.114682

C -2.581102 -2.086816 0.986343

O 0.756836 2.158951 0.003211

C 1.224471 3.549378 -0.157855



|   |           |           |           |
|---|-----------|-----------|-----------|
| C | 1.651004  | 4.114484  | 1.193475  |
| C | -0.013725 | 4.266488  | -0.677624 |
| C | 2.339635  | 3.594679  | -1.199628 |
| C | 1.617671  | 1.212577  | 0.344229  |
| O | 2.753653  | 1.377431  | 0.737719  |
| O | -2.137096 | 0.850555  | 0.560848  |
| C | -3.447586 | 1.447909  | 0.230192  |
| C | -4.135887 | 0.651711  | -0.875386 |
| C | -3.263065 | 2.910548  | -0.147838 |
| C | -4.203562 | 1.310469  | 1.546679  |
| C | -1.244017 | 0.588598  | -0.367121 |
| O | -1.223436 | 0.948668  | -1.513275 |
| H | 3.851194  | -2.241724 | 2.224921  |
| H | 6.100199  | -2.865904 | 1.362427  |
| H | 6.682673  | -2.403041 | -1.100399 |
| H | 5.027004  | -1.325165 | -2.502929 |
| H | 2.790021  | -0.697726 | -1.628459 |
| H | -1.988638 | -2.848492 | -2.274785 |
| H | -4.288065 | -3.769908 | -2.060474 |
| H | -5.469684 | -3.644138 | 0.116513  |
| H | -4.364420 | -2.591755 | 2.072011  |
| H | -2.091338 | -1.612912 | 1.830005  |
| H | 0.850167  | 3.980638  | 1.927626  |
| H | 2.555847  | 3.629718  | 1.560803  |
| H | 1.841778  | 5.187339  | 1.086903  |
| H | 0.236594  | 5.305954  | -0.909255 |
| H | -0.805176 | 4.262812  | 0.074744  |
| H | -0.385764 | 3.781356  | -1.584264 |
| H | 2.584808  | 4.640247  | -1.410745 |
| H | 3.240093  | 3.090273  | -0.847762 |
| H | 2.004604  | 3.126488  | -2.130734 |
| H | -4.229054 | -0.401384 | -0.597577 |
| H | -5.142781 | 1.057696  | -1.014868 |
| H | -3.600309 | 0.728011  | -1.822819 |
| H | -2.673859 | 3.010281  | -1.060872 |
| H | -2.770426 | 3.454062  | 0.663398  |
| H | -4.245298 | 3.363612  | -0.315015 |
| H | -5.199826 | 1.751335  | 1.446495  |
| H | -4.313524 | 0.256137  | 1.815939  |
| H | -3.672818 | 1.826631  | 2.352083  |

#### E5\_GP2\_CC

Inner Energy (Hartree) : -1491.866919  
 Zero Point Energy (Hartree) : 0.495163  
 Enthalpy (Hartree) : -1491.339328  
 Entropy (Hartree) : 0.089781  
 Gibbs Energy (Hartree) : -1491.429109  
 Minimum geometry

|   |           |           |           |
|---|-----------|-----------|-----------|
| N | -0.270003 | -0.346428 | -0.152048 |
| N | 1.100028  | -0.276337 | -0.256088 |
| C | 1.764737  | -1.525979 | -0.316039 |
| C | -0.992159 | -0.381188 | -1.373742 |
| C | -2.335101 | -1.017015 | -1.337132 |
| C | 3.189791  | -1.553512 | 0.100457  |
| O | -0.475518 | 0.032156  | -2.387658 |
| O | 1.140093  | -2.520633 | -0.612631 |
| C | -3.351327 | -0.487422 | -2.130566 |
| C | -4.611289 | -1.075627 | -2.121086 |
| C | -4.845856 | -2.207059 | -1.342067 |
| C | -3.818034 | -2.755888 | -0.575963 |
| C | -2.562641 | -2.159967 | -0.567774 |
| C | 3.639125  | -0.777380 | 1.171218  |
| C | 4.954209  | -0.896676 | 1.602863  |
| C | 5.821942  | -1.778129 | 0.960738  |
| C | 5.369959  | -2.557842 | -0.101975 |
| C | 4.049567  | -2.457326 | -0.523849 |
| O | -2.032390 | 0.365907  | 1.014674  |
| C | -2.912375 | 0.510301  | 2.178600  |
| C | -2.949450 | -0.793787 | 2.969797  |
| C | -4.263029 | 0.787579  | 1.527111  |
| C | -2.441346 | 1.693870  | 3.017322  |
| C | -0.779116 | -0.033290 | 1.126577  |
| O | -0.101470 | -0.112074 | 2.122222  |
| O | 0.822431  | 1.929024  | -0.314448 |
| C | 1.031278  | 3.307610  | -0.766207 |
| C | 1.138640  | 3.336141  | -2.287889 |
| C | 2.259140  | 3.893263  | -0.075850 |
| C | -0.246023 | 3.995038  | -0.294295 |

|   |           |           |           |
|---|-----------|-----------|-----------|
| C | 1.675072  | 0.963122  | -0.617954 |
| O | 2.775630  | 1.062075  | -1.100426 |
| H | -3.150776 | 0.389199  | -2.738134 |
| H | -5.409321 | -0.654445 | -2.724354 |
| H | -5.828632 | -2.668730 | -1.339727 |
| H | -3.994690 | -3.650539 | 0.012946  |
| H | -1.751082 | -2.585816 | 0.014575  |
| H | 2.952009  | -0.106480 | 1.677933  |
| H | 5.302729  | -0.302320 | 2.441529  |
| H | 6.851913  | -1.862452 | 1.294205  |
| H | 6.045077  | -3.248250 | -0.597661 |
| H | 3.677407  | -3.068824 | -1.339364 |
| H | -3.234482 | -1.623668 | 2.315370  |
| H | -1.982886 | -1.012218 | 3.427389  |
| H | -3.698885 | -0.708895 | 3.762804  |
| H | -5.025370 | 0.926556  | 2.299523  |
| H | -4.556798 | -0.049901 | 0.886307  |
| H | -4.215567 | 1.693920  | 0.915948  |
| H | -3.160974 | 1.878869  | 3.821213  |
| H | -1.463086 | 1.495531  | 3.459087  |
| H | -2.377345 | 2.594257  | 2.398098  |
| H | 0.291378  | 2.807457  | -2.734539 |
| H | 1.124194  | 4.375832  | -2.629620 |
| H | 2.064090  | 2.869244  | -2.629450 |
| H | 3.170293  | 3.387097  | -0.398717 |
| H | 2.164263  | 3.799591  | 1.010668  |
| H | 2.339736  | 4.956448  | -0.323888 |
| H | -0.222841 | 5.053379  | -0.570309 |
| H | -1.122725 | 3.530421  | -0.755768 |
| H | -0.342310 | 3.919426  | 0.793259  |

#### E5\_CIS\_CC

Inner Energy (Hartree) : -1491.828167  
 Zero Point Energy (Hartree) : 0.494400  
 Enthalpy (Hartree) : -1491.302253  
 Entropy (Hartree) : 0.087882  
 Gibbs Energy (Hartree) : -1491.390135  
 Imaginary frequency (cm-1): -24.29

|   |           |           |           |
|---|-----------|-----------|-----------|
| N | 0.854602  | 0.124157  | -0.558924 |
| N | -0.447330 | 0.088850  | 0.026327  |
| C | -1.431437 | 0.655252  | -0.809263 |
| C | 1.257405  | 1.408751  | -1.137020 |
| C | 0.917156  | 2.626156  | -0.348148 |
| C | -2.830584 | 0.605370  | -0.301070 |
| O | 1.912617  | 1.427097  | -2.142284 |
| O | -1.140236 | 1.195516  | -1.858181 |
| C | 0.826293  | 3.839973  | -1.033248 |
| C | 0.566151  | 5.012444  | -0.336766 |
| C | 0.412461  | 4.979267  | 1.048650  |
| C | 0.517923  | 3.772741  | 1.735791  |
| C | 0.763748  | 2.593347  | 1.040394  |
| C | -3.146329 | 0.877283  | 1.031583  |
| C | -4.477238 | 0.886175  | 1.434321  |
| C | -5.487880 | 0.614384  | 0.515448  |
| C | -5.172411 | 0.349934  | -0.816333 |
| C | -3.845950 | 0.359545  | -1.228798 |
| O | 3.023407  | -0.363643 | -0.370537 |
| C | 4.228998  | -0.964090 | 0.212929  |
| C | 4.383711  | -0.506395 | 1.660666  |
| C | 5.333417  | -0.383011 | -0.663580 |
| C | 4.169241  | -2.483265 | 0.079117  |
| C | 1.825280  | -0.608531 | 0.127747  |
| O | 1.550544  | -1.357670 | 1.044821  |
| O | -0.727343 | -2.123715 | -0.384036 |
| C | -1.101228 | -3.527883 | -0.152758 |
| C | -2.604505 | -3.602630 | 0.100708  |
| C | -0.277777 | -4.109601 | 0.991477  |
| C | -0.734029 | -4.184016 | -1.478791 |
| C | -0.846194 | -1.220691 | 0.568615  |
| O | -1.320989 | -1.333452 | 1.663094  |
| H | 0.952855  | 3.846144  | -2.110622 |
| H | 0.483883  | 5.953043  | -0.872093 |
| H | 0.210989  | 5.896690  | 1.593512  |
| H | 0.406715  | 3.747613  | 2.815181  |
| H | 0.835464  | 1.654893  | 1.580655  |
| H | -2.354406 | 1.081056  | 1.743066  |
| H | -4.724565 | 1.104446  | 2.468286  |
| H | -6.525300 | 0.614150  | 0.836244  |

|   |           |           |           |
|---|-----------|-----------|-----------|
| H | -5.960482 | 0.143927  | -1.533696 |
| H | -3.584666 | 0.175549  | -2.265944 |
| H | 4.349568  | 0.586393  | 1.716965  |
| H | 3.600064  | -0.921889 | 2.296334  |
| H | 5.354932  | -0.838871 | 2.040358  |
| H | 6.305828  | -0.755635 | -0.328212 |
| H | 5.336182  | 0.709159  | -0.603710 |
| H | 5.186972  | -0.673010 | -1.707950 |
| H | 5.135667  | -2.906621 | 0.370669  |
| H | 3.393988  | -2.908676 | 0.718180  |
| H | 3.971440  | -2.763515 | -0.960286 |
| H | -3.149831 | -3.098324 | -0.703548 |
| H | -2.914118 | -4.652249 | 0.122890  |
| H | -2.871000 | -3.139757 | 1.052349  |
| H | -0.529430 | -3.640146 | 1.943614  |
| H | 0.789301  | -3.967041 | 0.801172  |
| H | -0.482331 | -5.182583 | 1.063839  |
| H | -0.975850 | -5.250357 | -1.442640 |
| H | -1.290420 | -3.727130 | -2.302530 |
| H | 0.336316  | -4.074443 | -1.676962 |

#### E5\_GP1

|                             |                |
|-----------------------------|----------------|
| Inner Energy (Hartree)      | : -1491.868508 |
| Zero Point Energy (Hartree) | : 0.495556     |
| Enthalpy (Hartree)          | : -1491.340711 |
| Entropy (Hartree)           | : 0.089174     |
| Gibbs Energy (Hartree)      | : -1491.429885 |

#### Minimum geometry

|   |           |           |           |
|---|-----------|-----------|-----------|
| N | -0.673311 | 0.006220  | -0.253060 |
| N | 0.694350  | 0.088276  | -0.175904 |
| C | 1.346186  | 0.743735  | -1.252994 |
| C | -1.179597 | -1.146833 | -0.898224 |
| C | -2.548110 | -1.586773 | -0.512661 |
| C | 2.755751  | 0.352167  | -1.523816 |
| O | -0.472384 | -1.770858 | -1.657865 |
| O | 0.725218  | 1.517686  | -1.944585 |
| C | -3.409187 | -2.067713 | -1.497006 |
| C | -4.678217 | -2.514330 | -1.143884 |
| C | -5.072043 | -2.509188 | 0.192794  |
| C | -4.194988 | -2.060893 | 1.179755  |
| C | -2.934165 | -1.592951 | 0.829297  |
| C | 3.140004  | -0.989468 | -1.478736 |
| C | 4.449398  | -1.340640 | -1.784399 |
| C | 5.375449  | -0.354422 | -2.122683 |
| C | 4.985075  | 0.981961  | -2.180454 |
| C | 3.670338  | 1.335454  | -1.895962 |
| O | -2.586041 | 1.155591  | -0.349326 |
| C | -3.629445 | 2.084048  | 0.101003  |
| C | -3.825761 | 1.961565  | 1.609387  |
| C | -4.856359 | 1.574396  | -0.647562 |
| C | -3.257835 | 3.499402  | -0.328091 |
| C | -1.377066 | 1.154641  | 0.175844  |
| O | -0.865929 | 1.974506  | 0.898848  |
| O | 2.447129  | 0.206854  | 1.200801  |
| C | 3.364146  | -0.232327 | 2.258805  |
| C | 3.545942  | -1.745983 | 2.195057  |
| C | 2.835675  | 0.238659  | 3.609608  |
| C | 4.655736  | 0.484985  | 1.881190  |
| C | 1.236798  | -0.297994 | 1.068114  |
| O | 0.612475  | -0.973130 | 1.851666  |
| H | -3.085006 | -2.075708 | -2.532695 |
| H | -5.358324 | -2.871221 | -1.910844 |
| H | -6.060716 | -2.864209 | 0.467568  |
| H | -4.493858 | -2.076455 | 2.223296  |
| H | -2.239285 | -1.248650 | 1.590208  |
| H | 2.407610  | -1.750057 | -1.224586 |
| H | 4.747780  | -2.384179 | -1.760730 |
| H | 6.400615  | -0.629753 | -2.351340 |
| H | 5.704078  | 1.748387  | -2.452144 |
| H | 3.349355  | 2.370938  | -1.946299 |
| H | -4.039878 | 0.923044  | 1.880377  |
| H | -2.945415 | 2.302387  | 2.157029  |
| H | -4.680440 | 2.576988  | 1.907143  |
| H | -5.723777 | 2.194235  | -0.401382 |
| H | -5.070995 | 0.538103  | -0.367394 |
| H | -4.691877 | 1.616852  | -1.728311 |
| H | -4.088606 | 4.175903  | -0.103063 |
| H | -2.367642 | 3.847148  | 0.199347  |

|   |           |           |           |
|---|-----------|-----------|-----------|
| H | -3.067712 | 3.531280  | -1.405206 |
| H | 3.876043  | -2.045407 | 1.195398  |
| H | 4.316037  | -2.042497 | 2.913952  |
| H | 2.621325  | -2.271224 | 2.441323  |
| H | 1.902632  | -0.267822 | 3.863097  |
| H | 2.660847  | 1.318760  | 3.592343  |
| H | 3.577763  | 0.020967  | 4.384433  |
| H | 5.438796  | 0.242456  | 2.605905  |
| H | 4.987222  | 0.175388  | 0.884943  |
| H | 4.506056  | 1.568702  | 1.877792  |

#### E5\_TRANS\_CC

|                             |                |
|-----------------------------|----------------|
| Inner Energy (Hartree)      | : -1491.826906 |
| Zero Point Energy (Hartree) | : 0.494378     |
| Enthalpy (Hartree)          | : -1491.301052 |
| Entropy (Hartree)           | : 0.087507     |
| Gibbs Energy (Hartree)      | : -1491.388559 |

#### Imaginary frequency (cm-1): -18.14

|   |           |           |           |
|---|-----------|-----------|-----------|
| N | 0.255145  | 0.244365  | -0.259796 |
| N | 0.131970  | -0.749917 | 0.764882  |
| C | 1.368531  | -1.143700 | 1.473758  |
| C | -0.993417 | 0.709286  | -0.902601 |
| C | -2.094017 | 1.156446  | -0.006487 |
| C | 2.512267  | -1.570744 | 0.623293  |
| O | -1.029040 | 0.782478  | -2.099469 |
| O | 1.348302  | -1.214126 | 2.670027  |
| C | -3.319351 | 1.465502  | -0.606733 |
| C | -4.388144 | 1.894737  | 0.167480  |
| C | -4.234609 | 2.033389  | 1.546590  |
| C | -3.009735 | 1.750969  | 2.144944  |
| C | -1.938054 | 1.312027  | 1.374473  |
| C | 2.363564  | -1.894292 | -0.727618 |
| C | 3.462774  | -2.334205 | -1.457908 |
| C | 4.708782  | -2.444336 | -0.847059 |
| C | 4.858146  | -2.122300 | 0.501586  |
| C | 3.762275  | -1.692017 | 1.236352  |
| O | 0.973657  | 2.289122  | -0.763973 |
| C | 1.705394  | 3.551677  | -0.595104 |
| C | 1.344406  | 4.175419  | 0.750259  |
| C | 1.165904  | 4.392476  | -1.747160 |
| C | 3.202902  | 3.305236  | -0.750437 |
| C | 1.130720  | 1.283481  | 0.081752  |
| O | 1.906869  | 1.218573  | 1.012006  |
| O | -1.449448 | -1.686035 | -0.538449 |
| C | -2.586914 | -2.569718 | -0.837760 |
| C | -3.619163 | -2.447541 | 0.278824  |
| C | -2.092985 | -3.999309 | -1.038215 |
| C | -3.120592 | -1.994661 | -2.144660 |
| C | -0.723596 | -1.839013 | 0.563150  |
| O | -0.752823 | -2.769621 | 1.335905  |
| H | -3.414694 | 1.369603  | -1.683166 |
| H | -5.338799 | 2.125991  | -0.302373 |
| H | -5.070169 | 2.367313  | 2.154199  |
| H | -2.886024 | 1.867232  | 3.216668  |
| H | -0.994805 | 1.079756  | 1.856321  |
| H | 1.398644  | -1.803431 | -1.215128 |
| H | 3.344100  | -2.589878 | -2.506027 |
| H | 5.565754  | -2.782934 | -1.421638 |
| H | 5.829272  | -2.209488 | 0.978599  |
| H | 3.857243  | -1.441409 | 2.287460  |
| H | 0.256728  | 4.248372  | 0.852470  |
| H | 1.742462  | 3.591804  | 1.581810  |
| H | 1.762741  | 5.185500  | 0.801008  |
| H | 1.641125  | 5.377814  | -1.738773 |
| H | 0.083991  | 4.524317  | -1.652753 |
| H | 1.375912  | 3.910045  | -2.706085 |
| H | 3.724935  | 4.267353  | -0.757510 |
| H | 3.593691  | 2.700555  | 0.069200  |
| H | 3.406431  | 2.796941  | -1.698061 |
| H | -3.897501 | -1.398308 | 0.423749  |
| H | -4.517415 | -3.007625 | 0.000509  |
| H | -3.236039 | -2.849714 | 1.218588  |
| H | -1.714059 | -4.424148 | -0.108471 |
| H | -1.298992 | -4.022181 | -1.791505 |
| H | -2.923479 | -4.615398 | -1.397569 |
| H | -3.961500 | -2.601139 | -2.493871 |
| H | -3.467659 | -0.968142 | -2.002991 |
| H | -2.342371 | -1.995903 | -2.912942 |

**E5\_TRANS\_C**

Inner Energy (Hartree) : -1491.830152  
Zero Point Energy (Hartree) : 0.494834  
Enthalpy (Hartree) : -1491.304035  
Entropy (Hartree) : 0.087033  
Gibbs Energy (Hartree) : -1491.391068

Imaginary frequency (cm-1): -18.92

N -0.529739 -0.022517 -0.222525  
N 0.829287 -0.245802 -0.587692  
C 1.394256 -1.311578 0.139569  
C -1.086694 1.177378 -0.671302  
C -2.533777 1.406238 -0.379119  
C 2.854022 -1.546152 -0.052138  
O -0.417874 2.011181 -1.253796  
O 0.712175 -2.011600 0.862624  
C -3.039191 1.347365 0.920133  
C -4.375453 1.651940 1.152966  
C -5.210725 1.993884 0.090739  
C -4.703330 2.057451 -1.205045  
C -3.360187 1.781612 -1.438790  
C 3.602328 -1.875340 1.081401  
C 4.962938 -2.129718 0.963987  
C 5.572771 -2.083443 -0.288673  
C 4.821630 -1.782702 -1.421910  
C 3.462845 -1.508135 -1.308050  
O -2.193501 -1.354949 0.537396  
C -3.266808 -2.359672 0.471927  
C -4.171805 -2.043857 -0.715017  
C -4.000377 -2.142732 1.790702  
C -2.663854 -3.759995 0.410415  
C -1.327207 -1.230620 -0.438032  
O -1.168198 -1.924166 -1.406401  
O 1.669923 1.534071 0.532102  
C 2.513777 2.707494 0.805609  
C 2.162570 3.842774 -0.150441  
C 3.979469 2.289272 0.719817  
C 2.126643 3.059748 2.237444  
C 1.683422 0.948050 -0.651203  
O 2.365665 1.193290 -1.605092  
H -2.389326 1.057339 1.738361  
H -4.767129 1.616879 2.164928  
H -6.256888 2.218618 0.274990  
H -5.350539 2.329918 -2.032582  
H -2.948749 1.846889 -2.441016  
H 3.109349 -1.924476 2.046991  
H 5.546451 -2.370511 1.847024  
H 6.635120 -2.288172 -0.381683  
H 5.293652 -1.759646 -2.398913  
H 2.876507 -1.263972 -2.186147  
H -4.544655 -1.016429 -0.646213  
H -3.643995 -2.171058 -1.662513  
H -5.028848 -2.724545 -0.703663  
H -4.834801 -2.846209 1.866468  
H -4.395412 -1.124530 1.847254  
H -3.326464 -2.308267 2.636491  
H -3.461736 -4.496471 0.549636  
H -2.176398 -3.945440 -0.547055  
H -1.928931 -3.888164 1.210674  
H 1.088167 4.043674 -0.122280  
H 2.697577 4.745829 0.160511  
H 2.446774 3.603063 -1.176003  
H 4.260698 2.034244 -0.303326  
H 4.165335 1.423212 1.363391  
H 4.610673 3.115987 1.060763  
H 2.704753 3.925361 2.574100  
H 1.062313 3.306146 2.297200  
H 2.330583 2.220782 2.909529

**F6\_GP2\_C**

Inner Energy (Hartree) : -1108.520964  
Zero Point Energy (Hartree) : 0.387479  
Enthalpy (Hartree) : -1108.107236  
Entropy (Hartree) : 0.077169  
Gibbs Energy (Hartree) : -1108.184405

Minimum geometry

N -1.039365 1.295577 -0.222747  
N 0.143283 0.997864 0.428382

C 0.053747 0.960709 1.846629  
C -1.248460 2.618820 -0.674111  
C -0.167173 3.600219 -0.282041  
C 1.309388 0.771255 2.655898  
O -2.212955 2.922825 -1.329409  
O -1.026175 1.145864 2.358547  
O -1.368423 -0.902906 -0.073691  
C -2.114788 -2.159859 0.003817  
C -2.649919 -2.534187 -1.375264  
C -3.217096 -2.037633 1.052253  
C -1.040328 -3.144207 0.456130  
C -1.971604 0.242564 -0.386859  
O -3.106238 0.397186 -0.751403  
O 2.057640 -0.185001 0.255245  
C 3.242086 -0.759751 -0.402874  
C 2.801729 -1.835023 -1.391080  
C 3.998699 -1.372381 0.770638  
C 4.058260 0.348120 -1.061273  
C 1.147776 0.481497 -0.428216  
O 1.103835 0.667507 -1.619552  
H -0.047670 3.648458 0.804166  
H 0.792344 3.318640 -0.724785  
H -0.466813 4.577816 -0.658860  
H 2.154514 1.324533 2.243544  
H 1.086307 1.112631 3.667280  
H 1.584766 -0.285371 2.683173  
H -3.415164 -1.830919 -1.706345  
H -1.835679 -2.545261 -2.106847  
H -3.087443 -3.536758 -1.331654  
H -4.000342 -1.351386 0.726573  
H -2.799375 -1.675940 1.997153  
H -3.662822 -3.022544 1.223440  
H -0.229959 -3.189693 -0.278127  
H -0.622885 -2.840497 1.421175  
H -1.471356 -4.144201 0.560855  
H 3.687221 -2.342207 -1.786766  
H 2.177416 -2.579350 -0.886888  
H 2.243075 -1.404732 -2.223460  
H 4.274199 -0.602755 1.498212  
H 4.913046 -1.852203 0.409921  
H 3.385443 -2.127061 1.272475  
H 4.291817 1.132321 -0.333810  
H 5.001374 -0.071396 -1.424844  
H 3.525202 0.789134 -1.904807

**F6\_CIS\_C**

Inner Energy (Hartree) : -1108.479062  
Zero Point Energy (Hartree) : 0.387087  
Enthalpy (Hartree) : -1108.066758  
Entropy (Hartree) : 0.074636  
Gibbs Energy (Hartree) : -1108.141394

Imaginary frequency (cm-1): -40.90

N 1.300932 -1.037269 -0.125661  
N -0.102647 -1.249597 -0.040828  
C -0.448242 -2.544484 -0.458972  
C 2.046493 -2.077508 0.632045  
C 3.296647 -2.574887 -0.030092  
C -1.918347 -2.863973 -0.559564  
O 1.641159 -2.431745 1.703028  
O 0.414867 -3.369100 -0.688314  
O 1.080081 1.228378 0.024303  
C 1.599546 2.606033 -0.071896  
C 2.379006 2.769586 -1.373874  
C 2.431599 2.934120 1.164572  
C 0.330871 3.446180 -0.103834  
C 1.919201 0.205873 -0.008309  
O 3.131686 0.265628 0.063040  
O -1.947585 -0.114146 0.524602  
C -3.214223 0.621173 0.338762  
C -2.933975 2.107721 0.168209  
C -3.939637 0.348536 1.651426  
C -3.990827 0.048932 -0.843569  
C -1.041337 -0.208044 -0.429793  
O -1.010416 0.358446 -1.489345  
H 3.336909 -2.291576 -1.080350  
H 4.162640 -2.158087 0.489178  
H 3.313703 -3.662408 0.071169  
H -2.380640 -2.312750 -1.384158

H -2.003848 -3.931540 -0.759314  
H -2.443298 -2.613227 0.364289  
H 3.302401 2.189520 -1.363912  
H 1.763903 2.452900 -2.222084  
H 2.631174 3.826332 -1.507051  
H 3.353340 2.352727 1.189531  
H 1.855355 2.730235 2.072670  
H 2.683925 3.999406 1.151241  
H -0.292872 3.164564 -0.955824  
H -0.242811 3.311596 0.816992  
H 0.594951 4.503911 -0.194583  
H -3.883963 2.651184 0.167054  
H -2.328752 2.478203 0.999589  
H -2.416817 2.307017 -0.771051  
H -4.096756 -0.725196 1.791071  
H -4.914744 0.844406 1.643165  
H -3.360953 0.729440 2.497800  
H -4.219618 -1.008964 -0.686641  
H -4.939174 0.587448 -0.932996  
H -3.441033 0.167671 -1.779542

#### F6\_GP2\_CC

Inner Energy (Hartree) : -1108.519787  
Zero Point Energy (Hartree) : 0.386888  
Enthalpy (Hartree) : -1108.106548  
Entropy (Hartree) : 0.077090  
Gibbs Energy (Hartree) : -1108.183637

#### Minimum geometry

N 0.261295 1.223237 0.642254  
N -0.261276 1.223220 -0.642253  
C 0.382746 2.027840 -1.620834  
C -0.382827 2.027744 1.620860  
C -1.581192 2.804011 1.122271  
C 1.580973 2.804293 -1.122202  
O 0.014256 2.086958 2.756399  
O -0.014297 2.086983 -2.756391  
O 1.523301 -0.439485 -0.145385  
C 2.479453 -1.552558 -0.130543  
C 2.002254 -2.645467 0.822034  
C 3.864958 -1.027221 0.232725  
C 2.434266 -2.033995 -1.576790  
C 1.220634 0.226308 0.964913  
O 1.667353 0.054820 2.067658  
O -1.523181 -0.439592 0.145360  
C -2.479419 -1.552590 0.130528  
C -3.864913 -1.027146 -0.232627  
C -2.434176 -2.034100 1.576749  
C -2.002346 -2.645480 -0.822134  
C -1.220468 0.226162 -0.964949  
O -1.667321 0.054790 -2.067657  
H -1.329694 3.464178 0.287788  
H -2.369968 2.125386 0.784898  
H -1.947926 3.398926 1.958300  
H 2.369849 2.125793 -0.784813  
H 1.947635 3.399275 -1.958215  
H 1.329344 3.464412 -0.287720  
H 2.051866 -2.321421 1.862125  
H 0.971744 -2.930293 0.587522  
H 2.636309 -3.528716 0.697148  
H 3.891365 -0.658714 1.259685  
H 4.155601 -0.219453 -0.446850  
H 4.595147 -1.836353 0.132638  
H 1.424759 -2.363254 -1.841555  
H 2.726853 -1.230816 -2.259571  
H 3.122524 -2.873827 -1.709707  
H -4.595148 -1.836234 -0.132513  
H -4.155454 -0.219382 0.446997  
H -3.891371 -0.658603 -1.259571  
H -1.424675 -2.363435 1.841441  
H -3.122479 -2.873895 1.709666  
H -2.726673 -1.230936 2.259586  
H -0.971840 -2.930381 -0.587697  
H -2.636449 -3.528696 -0.697260  
H -2.051998 -2.321372 -1.862204

#### F6\_CIS\_CC

Inner Energy (Hartree) : -1108.486989  
Zero Point Energy (Hartree) : 0.386227

Enthalpy (Hartree) : -1108.075119  
Entropy (Hartree) : 0.075659  
Gibbs Energy (Hartree) : -1108.150777  
Imaginary frequency (cm-1): -37.63

N -0.526609 1.016248 0.117438  
N 0.764604 1.253655 -0.416798  
C 1.404261 2.345133 0.178259  
C -1.409010 2.193681 -0.001335  
C -2.310909 2.432511 1.175464  
C 2.838131 2.562384 -0.239557  
O -1.354773 2.889076 -0.976115  
O 0.804987 3.085384 0.933676  
O -2.387128 -0.188672 0.161132  
C -3.255528 -1.358989 -0.019084  
C -2.749478 -2.514966 0.839023  
C -3.338752 -1.718013 -1.499760  
C -4.597245 -0.846292 0.493677  
C -1.101266 -0.217500 -0.170824  
O -0.492639 -1.152856 -0.646461  
O 1.955514 -0.497646 0.400255  
C 2.844979 -1.670402 0.402575  
C 2.279442 -2.773823 -0.485998  
C 2.826501 -2.089799 1.868107  
C 4.243359 -1.235514 -0.026824  
C 1.626725 0.113184 -0.724285  
O 2.057254 -0.066589 -1.829769  
H -3.348507 2.463142 0.835023  
H -2.194479 1.675810 1.948888  
H -2.049886 3.414096 1.580497  
H 2.955073 2.476572 -1.322035  
H 3.135392 3.556570 0.092762  
H 3.489540 1.821447 0.235427  
H -1.790849 -2.888973 0.476102  
H -2.638584 -2.195082 1.879968  
H -3.478395 -3.330837 0.806856  
H -2.383634 -2.088935 -1.874347  
H -3.636601 -0.842948 -2.085751  
H -4.095519 -2.496794 -1.637067  
H -4.518620 -0.542326 1.541847  
H -4.931507 0.012466 -0.096211  
H -5.349460 -1.636633 0.415122  
H 2.894251 -3.671312 -0.363689  
H 1.252478 -3.007190 -0.195437  
H 2.288701 -2.484468 -1.537891  
H 3.180450 -1.275721 2.507749  
H 3.478903 -2.955987 2.012959  
H 1.812148 -2.360786 2.175417  
H 4.611907 -0.433619 0.621567  
H 4.928049 -2.084764 0.062411  
H 4.250184 -0.892181 -1.063036

#### F6\_GP1

Inner Energy (Hartree) : -1108.530497  
Zero Point Energy (Hartree) : 0.387629  
Enthalpy (Hartree) : -1108.116642  
Entropy (Hartree) : 0.076870  
Gibbs Energy (Hartree) : -1108.193513

#### Minimum geometry

N -0.314498 1.176694 0.613743  
N 0.314487 1.176691 -0.613754  
C -0.214884 2.093475 -1.557222  
C 0.214831 2.093529 1.557185  
C -0.450187 2.208302 2.899303  
C 0.450036 2.208130 -2.899399  
O 1.179912 2.748619 1.236847  
O -1.179936 2.748599 -1.236869  
O -1.523331 -0.468548 -0.277823  
C -2.498185 -1.562815 -0.331499  
C -3.908516 -1.010670 -0.147869  
C -2.140745 -2.623548 0.706039  
C -2.301451 -2.098639 -1.745975  
C -1.354882 0.254136 0.818988  
O -1.962936 0.160368 1.859718  
O 1.523293 -0.468567 0.277815  
C 2.498197 -1.562790 0.331513  
C 2.140905 -2.623479 -0.706119  
C 2.301369 -2.098703 1.745942  
C 3.908514 -1.010557 0.148039

|   |           |           |           |
|---|-----------|-----------|-----------|
| C | 1.354967  | 0.254228  | -0.818941 |
| O | 1.963063  | 0.160488  | -1.859650 |
| H | -1.509406 | 2.450118  | 2.793899  |
| H | -0.389446 | 1.265556  | 3.446891  |
| H | 0.069253  | 2.996579  | 3.444723  |
| H | 0.389414  | 1.265293  | -3.446840 |
| H | -0.069545 | 2.996252  | -3.444909 |
| H | 1.509225  | 2.450124  | -2.794084 |
| H | -4.058437 | -0.632066 | 0.864199  |
| H | -4.093404 | -0.202605 | -0.862410 |
| H | -4.633777 | -1.808790 | -0.335328 |
| H | -2.280346 | -2.251310 | 1.721965  |
| H | -1.099538 | -2.939134 | 0.581466  |
| H | -2.782489 | -3.498223 | 0.561578  |
| H | -2.512116 | -1.319460 | -2.484457 |
| H | -1.272571 | -2.444000 | -1.887404 |
| H | -2.979257 | -2.939050 | -1.921945 |
| H | 2.782692  | -3.498122 | -0.561664 |
| H | 1.099707  | -2.939140 | -0.581654 |
| H | 2.280564  | -2.251165 | -1.722010 |
| H | 2.511943  | -1.319558 | 2.484486  |
| H | 2.979194  | -2.939096 | 1.921919  |
| H | 1.272492  | -2.444113 | 1.887270  |
| H | 4.093288  | -0.202512 | 0.862632  |
| H | 4.633801  | -1.808645 | 0.335531  |
| H | 4.058510  | -0.631901 | -0.863998 |

#### G7\_GP2\_C

|                             |                |
|-----------------------------|----------------|
| Inner Energy (Hartree)      | : -1190.260137 |
| Zero Point Energy (Hartree) | : 0.484934     |
| Enthalpy (Hartree)          | : -1189.746187 |
| Entropy (Hartree)           | : 0.082954     |
| Gibbs Energy (Hartree)      | : -1189.829141 |

#### Minimum geometry

|   |           |           |           |
|---|-----------|-----------|-----------|
| N | -0.539914 | -0.152256 | -0.484898 |
| N | -0.233066 | -0.644846 | 0.765074  |
| C | -1.018089 | -0.164701 | 1.903932  |
| C | -1.453890 | -0.933039 | -1.307861 |
| C | -2.893435 | -0.752529 | -0.881195 |
| C | -0.962415 | 1.325918  | 2.095295  |
| C | -0.504203 | 1.916129  | 3.194941  |
| C | -3.644047 | -1.820771 | -0.396085 |
| C | -4.957669 | -1.626109 | 0.029776  |
| C | -5.526501 | -0.357907 | -0.025006 |
| C | -4.780269 | 0.716004  | -0.511168 |
| C | -3.472542 | 0.518743  | -0.937474 |
| O | 1.084691  | 1.343291  | -0.168475 |
| C | 1.813055  | 2.586846  | -0.394816 |
| C | 0.834101  | 3.755912  | -0.477890 |
| C | 2.681160  | 2.464552  | -1.644559 |
| C | 2.671314  | 2.697141  | 0.861812  |
| C | 0.148340  | 0.918417  | -1.015002 |
| O | -0.108342 | 1.380544  | -2.112769 |
| O | 1.519937  | -1.613817 | -0.211133 |
| C | 2.855109  | -2.194911 | -0.282758 |
| C | 3.104961  | -2.258166 | -1.786925 |
| C | 2.855227  | -3.594580 | 0.327309  |
| C | 3.863098  | -1.265655 | 0.389218  |
| C | 0.953463  | -1.320594 | 0.962414  |
| O | 1.369366  | -1.618434 | 2.065726  |
| H | -2.056380 | -0.477239 | 1.745076  |
| H | -0.632157 | -0.684437 | 2.780996  |
| H | -1.311950 | -0.597218 | -2.336687 |
| H | -1.152541 | -1.983170 | -1.243190 |
| H | -1.365026 | 1.928027  | 1.282081  |
| H | -0.515097 | 2.996877  | 3.306969  |
| H | -0.102353 | 1.340137  | 4.025432  |
| H | -3.196983 | -2.810409 | -0.341662 |
| H | -5.532456 | -2.465671 | 0.409453  |
| H | -6.547918 | -0.203794 | 0.309914  |
| H | -5.221068 | 1.707431  | -0.558538 |
| H | -2.885318 | 1.351722  | -1.316813 |
| H | 1.394437  | 4.694468  | -0.535501 |
| H | 0.195133  | 3.675441  | -1.358872 |
| H | 0.208191  | 3.785411  | 0.420058  |
| H | 2.066986  | 2.380929  | -2.542247 |
| H | 3.326594  | 1.582737  | -1.572716 |
| H | 3.320351  | 3.349210  | -1.731413 |

|   |          |           |           |
|---|----------|-----------|-----------|
| H | 3.263818 | 3.616580  | 0.829686  |
| H | 2.035770 | 2.713544  | 1.752106  |
| H | 3.353499 | 1.845378  | 0.940952  |
| H | 3.054117 | -1.256704 | -2.225559 |
| H | 4.096122 | -2.677604 | -1.984244 |
| H | 2.355761 | -2.889218 | -2.274780 |
| H | 2.672423 | -3.553580 | 1.401869  |
| H | 3.826121 | -4.068590 | 0.149833  |
| H | 2.081873 | -4.210788 | -0.142794 |
| H | 4.876572 | -1.642771 | 0.219409  |
| H | 3.790183 | -0.263344 | -0.044615 |
| H | 3.686338 | -1.200508 | 1.464019  |

#### G7\_CIS\_C

|                             |                |
|-----------------------------|----------------|
| Inner Energy (Hartree)      | : -1190.210020 |
| Zero Point Energy (Hartree) | : 0.484575     |
| Enthalpy (Hartree)          | : -1189.697569 |
| Entropy (Hartree)           | : 0.080131     |
| Gibbs Energy (Hartree)      | : -1189.777700 |

#### Imaginary frequency (cm-1): -52.57

|   |           |           |           |
|---|-----------|-----------|-----------|
| N | -0.710138 | 0.291478  | -0.696170 |
| N | 0.060370  | -0.909487 | -0.548170 |
| C | -0.707115 | -1.931417 | 0.207892  |
| C | -1.856532 | 0.096345  | -1.592954 |
| C | -3.175641 | -0.146286 | -0.888760 |
| C | -1.134957 | -1.564332 | 1.600971  |
| C | -0.987444 | -2.366875 | 2.649966  |
| C | -3.994064 | -1.209819 | -1.267812 |
| C | -5.215842 | -1.427538 | -0.634348 |
| C | -5.628438 | -0.580968 | 0.389768  |
| C | -4.817573 | 0.487109  | 0.770532  |
| C | -3.601387 | 0.706770  | 0.132604  |
| O | 1.014882  | 1.679691  | -0.227839 |
| C | 1.541577  | 2.929895  | 0.329480  |
| C | 0.719421  | 3.333933  | 1.551055  |
| C | 1.568355  | 4.011478  | -0.747571 |
| C | 2.957251  | 2.551145  | 0.746478  |
| C | -0.269743 | 1.584324  | -0.560142 |
| O | -1.021181 | 2.526504  | -0.767316 |
| O | 2.226838  | -1.367810 | -0.813845 |
| C | 3.558458  | -1.830255 | -0.409503 |
| C | 4.105422  | -2.425333 | -1.703570 |
| C | 3.416112  | -2.907082 | 0.664240  |
| C | 4.422224  | -0.662871 | 0.053626  |
| C | 1.376081  | -0.846995 | 0.061927  |
| O | 1.612777  | -0.543549 | 1.203910  |
| H | -1.586521 | -2.177246 | -0.394694 |
| H | -0.078985 | -2.828769 | 0.216488  |
| H | -1.937720 | 0.994912  | -2.208621 |
| H | -1.606718 | -0.742272 | -2.249572 |
| H | -1.629542 | -0.601684 | 1.709086  |
| H | -1.352601 | -2.089983 | 3.634546  |
| H | -0.495080 | -3.333851 | 2.565579  |
| H | -3.671051 | -1.879960 | -2.061748 |
| H | -5.840102 | -2.262958 | -0.937439 |
| H | -6.577190 | -0.751351 | 0.889878  |
| H | -5.136270 | 1.154488  | 1.565979  |
| H | -2.973175 | 1.545985  | 0.416137  |
| H | 1.205938  | 4.178193  | 2.049738  |
| H | -0.292280 | 3.631411  | 1.270787  |
| H | 0.667227  | 2.498827  | 2.257033  |
| H | 0.558859  | 4.294154  | -1.046658 |
| H | 2.113496  | 3.653233  | -1.626888 |
| H | 2.087190  | 4.894227  | -0.359160 |
| H | 3.456475  | 3.420273  | 1.185553  |
| H | 2.933295  | 1.743698  | 1.482256  |
| H | 3.536993  | 2.220182  | -0.119819 |
| H | 4.162351  | -1.660305 | -2.483702 |
| H | 5.109514  | -2.825490 | -1.533662 |
| H | 3.461267  | -3.235856 | -2.057120 |
| H | 3.010405  | -2.495769 | 1.590331  |
| H | 4.399822  | -3.337581 | 0.876091  |
| H | 2.760899  | -3.710537 | 0.311396  |
| H | 5.447576  | -1.014421 | 0.207658  |
| H | 4.439753  | 0.120595  | -0.709845 |
| H | 4.051032  | -0.242119 | 0.988229  |

#### G7\_GP2\_CC

Inner Energy (Hartree) : -1190.259205  
Zero Point Energy (Hartree) : 0.485058  
Enthalpy (Hartree) : -1189.745244  
Entropy (Hartree) : 0.082492  
Gibbs Energy (Hartree) : -1189.827736

Minimum geometry

N -0.524814 0.869020 -0.506698  
N -0.127155 -0.315320 0.076157  
C -0.519493 -0.557638 1.472986  
C -1.579329 0.783511 -1.507168  
C -2.918832 0.466757 -0.883251  
C -1.311720 -1.823815 1.650279  
C -2.592149 -1.842165 2.005729  
C -3.613546 -0.690996 -1.221984  
C -4.847531 -0.974214 -0.638811  
C -5.393242 -0.100370 0.295537  
C -4.701121 1.059873 0.644307  
C -3.472606 1.339785 0.057180  
O 1.293264 1.752617 0.429150  
C 2.458429 2.628950 0.490079  
C 3.350612 1.914923 1.501406  
C 2.053747 4.009501 1.000118  
C 3.133235 2.681704 -0.878681  
C 0.313781 1.965739 -0.453876  
O 0.124000 2.977442 -1.100473  
O 1.355177 -1.959495 0.239587  
C 2.447406 -2.831923 -0.182487  
C 2.073941 -3.554917 -1.474543  
C 2.550692 -3.818761 0.976755  
C 3.735396 -2.022984 -0.319008  
C 0.933730 -0.951918 -0.531665  
O 1.381735 -0.626511 -1.614313  
H 0.381037 -0.570738 2.097096  
H -1.121513 0.305541 1.761087  
H -1.603251 1.751913 -2.010098  
H -1.301135 0.023998 -2.245987  
H -0.774557 -2.752526 1.471637  
H -3.134326 -2.775278 2.130183  
H -3.153350 -0.924465 2.167167  
H -3.183470 -1.381861 -1.942687  
H -5.377951 -1.881937 -0.911067  
H -6.353662 -0.319733 0.752602  
H -5.123206 1.747944 1.371064  
H -2.931235 2.243567 0.327097  
H 4.273754 2.482412 1.652880  
H 2.838948 1.817338 2.463946  
H 3.609874 0.914807 1.140419  
H 1.532790 3.920982 1.959079  
H 1.400743 4.512909 0.285976  
H 2.950954 4.618624 1.151699  
H 4.100630 3.186052 -0.788670  
H 3.299751 1.665477 -1.249969  
H 2.520967 3.223760 -1.601283  
H 2.003206 -2.857762 -2.310382  
H 2.837863 -4.305024 -1.703072  
H 1.114256 -4.068359 -1.355396  
H 2.762978 -3.292166 1.912179  
H 3.357869 -4.532786 0.787579  
H 1.615170 -4.374650 1.093758  
H 4.569873 -2.700109 -0.528044  
H 3.659219 -1.297320 -1.130194  
H 3.949774 -1.495178 0.616174

G7\_CIS\_CC

Inner Energy (Hartree) : -1190.217004  
Zero Point Energy (Hartree) : 0.485276  
Enthalpy (Hartree) : -1189.704312  
Entropy (Hartree) : 0.078601  
Gibbs Energy (Hartree) : -1189.782913  
Imaginary frequency (cm-1): -32.80

N 0.013232 1.153371 0.646540  
N -0.131693 1.047570 -0.784044  
C -0.480895 2.374475 -1.349833  
C -1.228912 1.522702 1.335700  
C -2.281492 0.440443 1.271246  
C 0.295993 3.543830 -0.809640  
C -0.284728 4.652704 -0.360983  
C -3.264645 0.452591 0.282292

C -4.174096 -0.596027 0.171375  
C -4.113248 -1.665819 1.060115  
C -3.145942 -1.678052 2.063246  
C -2.236410 -0.630654 2.168592  
O 1.706902 -0.314765 0.610245  
C 2.953121 -0.909355 1.094080  
C 3.535952 -1.536723 -0.168468  
C 2.645234 -1.975631 2.141445  
C 3.863839 0.193475 1.624726  
C 0.920332 0.426876 1.385150  
O 0.956889 0.474267 2.603802  
O 0.925078 -0.627627 -2.090945  
C -0.232973 -1.526062 -2.128401  
C 0.284427 -2.655198 -3.018027  
C -1.424124 -0.835348 -2.787980  
C -0.566125 -2.055399 -0.740457  
C 1.035995 0.554837 -1.507853  
O 2.013834 1.232284 -1.716063  
H -0.332494 2.281087 -2.430578  
H -1.554840 2.534473 -1.206842  
H -0.935639 1.723559 2.364960  
H -1.597093 2.460201 0.916085  
H 1.376963 3.441788 -0.822560  
H 0.297354 5.496933 -0.003829  
H -1.367988 4.763084 -0.340518  
H -3.317799 1.286243 -0.413748  
H -4.929280 -0.576896 -0.608873  
H -4.821139 -2.485036 0.975685  
H -3.099658 -2.505758 2.764745  
H -1.469524 -0.645782 2.938054  
H 4.497590 -2.004347 0.063933  
H 2.861588 -2.302161 -0.564302  
H 3.683811 -0.776848 -0.940314  
H 1.930427 -2.702430 1.741577  
H 2.229182 -1.531216 3.046116  
H 3.567929 -2.507533 2.395725  
H 4.841147 -0.231169 1.874897  
H 4.004708 0.961243 0.857606  
H 3.444048 0.654203 2.521138  
H 1.171843 -3.115824 -2.573483  
H -0.487200 -3.422625 -3.131372  
H 0.549596 -2.275568 -4.009230  
H -1.849609 -0.073412 -2.133980  
H -2.198341 -1.580152 -2.999162  
H -1.121429 -0.377937 -3.735860  
H -1.351987 -2.812842 -0.826556  
H 0.313441 -2.515761 -0.281815  
H -0.935809 -1.265349 -0.089225

G7\_GP1

Inner Energy (Hartree) : -1190.265315  
Zero Point Energy (Hartree) : 0.485386  
Enthalpy (Hartree) : -1189.751231  
Entropy (Hartree) : 0.081634  
Gibbs Energy (Hartree) : -1189.832865  
Minimum geometry

N 0.339144 -1.412054 0.005231  
N 0.363119 -0.930732 1.297388  
C 1.236593 -1.628576 2.239364  
C -0.717413 -2.364664 -0.326536  
C -2.072343 -1.727650 -0.532599  
C 2.693434 -1.315646 2.042011  
C 3.609306 -2.223534 1.719373  
C -2.954362 -1.576139 0.537371  
C -4.192787 -0.966838 0.353343  
C -4.562518 -0.509074 -0.909247  
C -3.687362 -0.660102 -1.983445  
C -2.446907 -1.261921 -1.794291  
O 1.890848 0.110904 -0.505504  
C 2.863770 0.793046 -1.349309  
C 3.598233 1.684719 -0.352257  
C 2.143221 1.632501 -2.401463  
C 3.824122 -0.221091 -1.967075  
C 1.077730 -0.822020 -0.998028  
O 0.970826 -1.154744 -2.164911  
O -0.695601 0.892525 0.551360  
C -1.267272 2.232563 0.622142  
C -1.843536 2.419750 -0.777353

|   |           |           |           |
|---|-----------|-----------|-----------|
| C | -0.168033 | 3.256313  | 0.896293  |
| C | -2.376415 | 2.270003  | 1.670404  |
| C | -0.074862 | 0.347829  | 1.592368  |
| O | 0.103202  | 0.850174  | 2.686948  |
| H | 0.912681  | -1.333359 | 3.239553  |
| H | 1.054238  | -2.701782 | 2.122727  |
| H | -0.395555 | -2.888930 | -1.226905 |
| H | -0.758304 | -3.089796 | 0.492380  |
| H | 2.970392  | -0.272756 | 2.180445  |
| H | 4.656208  | -1.960071 | 1.597744  |
| H | 3.346220  | -3.268517 | 1.568496  |
| H | -2.667453 | -1.935187 | 1.522813  |
| H | -4.871450 | -0.855241 | 1.194075  |
| H | -5.530901 | -0.040053 | -1.056688 |
| H | -3.971250 | -0.306040 | -2.970232 |
| H | -1.754819 | -1.367197 | -2.624978 |
| H | 4.342604  | 2.294044  | -0.873674 |
| H | 2.896780  | 2.350907  | 0.159158  |
| H | 4.110194  | 1.076605  | 0.399712  |
| H | 1.443782  | 2.323896  | -1.920150 |
| H | 1.591997  | 0.998695  | -3.097588 |
| H | 2.875798  | 2.221816  | -2.962423 |
| H | 4.645914  | 0.309783  | -2.458380 |
| H | 4.243998  | -0.860225 | -1.183419 |
| H | 3.318749  | -0.847441 | -2.703416 |
| H | -2.610902 | 1.666968  | -0.977505 |
| H | -2.290495 | 3.414897  | -0.865468 |
| H | -1.057004 | 2.320806  | -1.532271 |
| H | 0.262586  | 3.118657  | 1.889125  |
| H | -0.586988 | 4.265442  | 0.828141  |
| H | 0.625723  | 3.164272  | 0.147739  |
| H | -2.887845 | 3.237009  | 1.623258  |
| H | -3.107151 | 1.481350  | 1.464643  |
| H | -1.973376 | 2.133276  | 2.675211  |

#### G7\_TRANS\_CC

|                             |                               |
|-----------------------------|-------------------------------|
| Inner Energy (Hartree)      | : -1190.219109                |
| Zero Point Energy (Hartree) | : 0.485687                    |
| Enthalpy (Hartree)          | : -1189.705945                |
| Entropy (Hartree)           | : 0.079317                    |
| Gibbs Energy (Hartree)      | : -1189.785261                |
| Imaginary frequency (cm-1): | -24.36                        |
| N                           | 0.463655 -0.132088 -1.515408  |
| N                           | -0.519646 -0.580696 -0.563179 |
| C                           | -0.315802 -1.849505 0.169308  |
| C                           | 0.367026 1.333997 -1.817634   |
| C                           | 0.530042 2.186389 -0.580523   |
| C                           | -0.131121 -1.625491 1.643087  |
| C                           | -0.749054 -2.339033 2.578747  |
| C                           | -0.584347 2.615290 0.142832   |
| C                           | -0.429416 3.343397 1.319145   |
| C                           | 0.845705 3.654426 1.784488    |
| C                           | 1.964427 3.243628 1.062569    |
| C                           | 1.805260 2.516733 -0.113184   |
| O                           | 2.130239 -0.876550 -0.090478  |
| C                           | 3.484827 -1.335167 0.244371   |
| C                           | 3.333968 -1.807288 1.687082   |
| C                           | 4.461491 -0.165005 0.165174   |
| C                           | 3.881733 -2.495956 -0.663691  |
| C                           | 1.829157 -0.436138 -1.307733  |
| O                           | 2.630911 -0.231986 -2.195849  |
| O                           | -2.632632 -0.754527 0.077239  |
| C                           | -4.073295 -0.533433 0.049575  |
| C                           | -4.372287 0.963718 0.102326   |
| C                           | -4.530467 -1.217826 1.335259  |
| C                           | -4.694865 -1.208657 -1.170981 |
| C                           | -1.833255 -0.289028 -0.891979 |
| O                           | -2.210343 0.327984 -1.871266  |
| H                           | -1.183151 -2.488324 -0.002904 |
| H                           | 0.542484 -2.361911 -0.260785  |
| H                           | 1.165819 1.516053 -2.534696   |
| H                           | -0.583528 1.514599 -2.307199  |
| H                           | 0.556819 -0.828897 1.912566   |
| H                           | -0.573934 -2.163710 3.636074  |
| H                           | -1.456295 -3.125369 2.322673  |
| H                           | -1.580164 2.381618 -0.224517  |
| H                           | -1.305773 3.668860 1.872177   |
| H                           | 0.967747 4.222471 2.702049    |

|   |           |           |           |
|---|-----------|-----------|-----------|
| H | 2.961740  | 3.495954  | 1.411484  |
| H | 2.679167  | 2.204328  | -0.679571 |
| H | 4.292227  | -2.191961 | 2.048878  |
| H | 3.026575  | -0.979660 | 2.333546  |
| H | 2.585577  | -2.601762 | 1.762962  |
| H | 4.100741  | 0.665879  | 0.779999  |
| H | 4.586336  | 0.177855  | -0.862544 |
| H | 5.434583  | -0.482728 | 0.553401  |
| H | 4.838212  | -2.905521 | -0.323941 |
| H | 3.133008  | -3.293580 | -0.611192 |
| H | 3.988661  | -2.173428 | -1.700097 |
| H | -4.066036 | 1.459048  | -0.820356 |
| H | -5.447265 | 1.115573  | 0.243301  |
| H | -3.847198 | 1.421879  | 0.947261  |
| H | -4.281593 | -2.283350 | 1.311652  |
| H | -5.613882 | -1.115017 | 1.448880  |
| H | -4.040789 | -0.767242 | 2.203639  |
| H | -5.785923 | -1.150902 | -1.100140 |
| H | -4.376132 | -0.725535 | -2.095400 |
| H | -4.409854 | -2.265390 | -1.203674 |

#### G7\_TRANS\_C

|                             |                               |
|-----------------------------|-------------------------------|
| Inner Energy (Hartree)      | : -1190.217402                |
| Zero Point Energy (Hartree) | : 0.485648                    |
| Enthalpy (Hartree)          | : -1189.704203                |
| Entropy (Hartree)           | : 0.079333                    |
| Gibbs Energy (Hartree)      | : -1189.783536                |
| Imaginary frequency (cm-1): | -24.61                        |
| N                           | -0.371116 -0.282487 0.722102  |
| N                           | 0.064853 -0.690977 -0.591535  |
| C                           | -0.850658 -1.510187 -1.409601 |
| C                           | 0.467263 0.753177 1.376918    |
| C                           | 0.931106 1.861863 0.456435    |
| C                           | -1.306254 -2.757539 -0.699921 |
| C                           | -2.526732 -3.273937 -0.800208 |
| C                           | 2.191704 2.425053 0.651649    |
| C                           | 2.630013 3.486671 -0.136495   |
| C                           | 1.809086 3.991460 -1.140125   |
| C                           | 0.549012 3.432395 -1.344518   |
| C                           | 0.111896 2.377724 -0.550445   |
| O                           | -2.530051 0.028015 -0.044584  |
| C                           | -3.961678 0.310440 0.110560   |
| C                           | -4.463131 0.262543 -1.329958  |
| C                           | -4.138101 1.711568 0.690874   |
| C                           | -4.641896 -0.761660 0.957290  |
| C                           | -1.728439 -0.059140 1.013588  |
| O                           | -2.079503 0.103936 2.165317   |
| O                           | 2.094181 -1.089938 0.393937   |
| C                           | 3.525306 -1.405296 0.399124   |
| C                           | 3.916917 -1.135659 1.849586   |
| C                           | 4.285892 -0.477025 -0.544609  |
| C                           | 3.724651 -2.879740 0.056831   |
| C                           | 1.388529 -1.130651 -0.731116  |
| O                           | 1.814766 -1.504489 -1.808442  |
| H                           | -1.687187 -0.915118 -1.760716 |
| H                           | -0.247027 -1.782214 -2.275494 |
| H                           | -0.162252 1.165524 2.165748   |
| H                           | 1.319726 0.285950 1.861684    |
| H                           | -0.545643 -3.270492 -0.111237 |
| H                           | -2.793379 -4.208562 -0.316202 |
| H                           | -3.303041 -2.786894 -1.385984 |
| H                           | 2.838317 2.031426 1.432453    |
| H                           | 3.614861 3.912905 0.030513    |
| H                           | 2.149218 4.813493 -1.762741   |
| H                           | -0.095897 3.818100 -2.128667  |
| H                           | -0.866624 1.939773 -0.726069  |
| H                           | -5.528507 0.509275 -1.359771  |
| H                           | -3.921585 0.983502 -1.950167  |
| H                           | -4.329283 -0.735650 -1.757532 |
| H                           | -3.603726 2.446201 0.079334   |
| H                           | -3.766993 1.762241 1.715158   |
| H                           | -5.201352 1.972159 0.688156   |
| H                           | -5.726327 -0.620874 0.903575  |
| H                           | -4.403431 -1.757454 0.572521  |
| H                           | -4.329731 -0.702279 2.000014  |
| H                           | 3.308051 -1.737386 2.531091   |
| H                           | 4.969374 -1.391808 2.003419   |
| H                           | 3.781195 -0.078867 2.099985   |

|   |          |           |           |
|---|----------|-----------|-----------|
| H | 4.056055 | -0.694817 | -1.587774 |
| H | 5.360829 | -0.608818 | -0.383596 |
| H | 4.030805 | 0.566923  | -0.337124 |
| H | 4.780317 | -3.140754 | 0.183457  |

|   |          |           |           |
|---|----------|-----------|-----------|
| H | 3.132685 | -3.507942 | 0.730421  |
| H | 3.432338 | -3.085857 | -0.973412 |



## Bibliography

1. Rasmussen, L.K. Facile Synthesis of Mono-, Di-, and Trisubstituted Alpha-Unbranched Hydrazines. *J. Org. Chem.* **2006**, *71*, 3627–3629, doi:10.1021/jo0525783.
2. Bredihhin, A.; Mäeorg, U. Effective Strategy for the Systematic Synthesis of Hydrazine Derivatives. *Tetrahedron* **2008**, *64*, 6788–6793, doi:10.1016/j.tet.2008.04.096.
3. Comparison of Dynamic HPLC and Dynamic NMR in the Study of Conformational Stereodynamics: Case of the Enantiomers of a Hindered Secondary Phosphine Oxide1 | Journal of the American Chemical Society Available online: <https://pubs.acs.org/doi/10.1021/ja9941779> (accessed on 25 September 2023).
4. Gasparrini, F.; D'Acquarica, I.; Pierini, M.; Villani, C. Chromatographic Resolution and Enantiomerization Barriers of Axially Chiral 1-Naphthamides. *J. Sep. Sci.* **2001**, *24*, 941–946, doi:10.1002/1615-9314(20011201)24:12<941::AID-JSSC941>3.0.CO;2-V.
5. Sabia, R.; Ciogli, A.; Pierini, M.; Franzini, R.; Iazzetti, A.; Villani, C. Chromatographic Separation of the Interconverting Enantiomers of Imidazo- and Triazole-Fused Benzodiazepines. *J. Chromatogr. A* **2021**, *1647*, 462148, doi:10.1016/j.chroma.2021.462148.
6. Humphrey, W.; Dalke, A.; Schulten, K. VMD: Visual Molecular Dynamics. *J. Mol. Graph.* **1996**, *14*, 33–38, doi:10.1016/0263-7855(96)00018-5.
7. Pettersen, E.F.; Goddard, T.D.; Huang, C.C.; Couch, G.S.; Greenblatt, D.M.; Meng, E.C.; Ferrin, T.E. UCSF Chimera?A Visualization System for Exploratory Research and Analysis. *J. Comput. Chem.* **2004**, *25*, 1605–1612, doi:10.1002/jcc.20084.
8. Pracht, P.; Bohle, F.; Grimme, S. Automated Exploration of the Low-Energy Chemical Space with Fast Quantum Chemical Methods. *Phys. Chem. Chem. Phys.* **2020**, *22*, 7169–7192, doi:10.1039/C9CP06869D.
9. Bannwarth, C.; Caldeweyher, E.; Ehlert, S.; Hansen, A.; Pracht, P.; Seibert, J.; Spicher, S.; Grimme, S. Extended TIGHT-BINDING Quantum Chemistry Methods. *WIREs Comput. Mol. Sci.* **2021**, *11*, doi:10.1002/wcms.1493.
10. Grimme, S.; Bohle, F.; Hansen, A.; Pracht, P.; Spicher, S.; Stahn, M. Efficient Quantum Chemical Calculation of Structure Ensembles and Free Energies for Nonrigid Molecules. *J. Phys. Chem. A* **2021**, *125*, 4039–4054, doi:10.1021/acs.jpca.1c00971.
11. Bannwarth, C.; Ehlert, S.; Grimme, S. GFN2-xTB—An Accurate and Broadly Parametrized Self-Consistent Tight-Binding Quantum Chemical Method with Multipole Electrostatics and Density-Dependent Dispersion Contributions. *J. Chem. Theory Comput.* **2019**, *15*, 1652–1671, doi:10.1021/acs.jctc.8b01176.
12. Neese, F. Software Update: The ORCA Program System—Version 5.0. *WIREs Comput. Mol. Sci.* *n/a*, e1606, doi:10.1002/wcms.1606.
13. Brandenburg, J.G.; Bannwarth, C.; Hansen, A.; Grimme, S. B97-3c: A Revised Low-Cost Variant of the B97-D Density Functional Method. *J. Chem. Phys.* **2018**, *148*, 064104, doi:10.1063/1.5012601.
14. Grimme, S.; Hansen, A.; Ehlert, S.; Mewes, J.-M. r2SCAN-3c: A “Swiss Army Knife” Composite Electronic-Structure Method. *J. Chem. Phys.* **2021**, *154*, 064103, doi:10.1063/5.0040021.
15. Grimme, S. Supramolecular Binding Thermodynamics by Dispersion-Corrected Density Functional Theory. *Chem. – Eur. J.* **2012**, *18*, 9955–9964, doi:10.1002/chem.201200497.
16. Ehlert, S.; Stahn, M.; Spicher, S.; Grimme, S. Robust and Efficient Implicit Solvation Model for Fast Semiempirical Methods. *J. Chem. Theory Comput.* **2021**, *17*, 4250–4261, doi:10.1021/acs.jctc.1c00471.

17. Spicher, S.; Grimme, S. Single-Point Hessian Calculations for Improved Vibrational Frequencies and Rigid-Rotor-Harmonic-Oscillator Thermodynamics. *J. Chem. Theory Comput.* **2021**, *17*, 1701–1714, doi:10.1021/acs.jctc.0c01306.
18. M. J. Frisch; G. W. Trucks; H. B. Schlegel; G. E. Scuseria; M. A. Robb; J. R. Cheeseman; G. Scalmani; V. Barone; G. A. Petersson; H. Nakatsuji; et al. Gaussian 16, Revision A.03. *Gaussian Inc* **2016**.
19. Portolani, C.; Centonze, G.; Luciani, S.; Pellegrini, A.; Righi, P.; Mazzanti, A.; Ciogli, A.; Sorato, A.; Bencivenni, G. Synthesis of Atropisomeric Hydrazides by One-Pot Sequential Enantio- and Diastereoselective Catalysis. *Angew. Chem. Int. Ed.* **2022**, doi:10.1002/anie.202209895.
20. Contreras-García, J.; Johnson, E.R.; Keinan, S.; Chaudret, R.; Piquemal, J.-P.; Beratan, D.N.; Yang, W. NCIPLOT: A Program for Plotting Noncovalent Interaction Regions. *J. Chem. Theory Comput.* **2011**, *7*, 625–632, doi:10.1021/ct100641a.
21. Zimmerman, P.M. Growing String Method with Interpolation and Optimization in Internal Coordinates: Method and Examples. *J. Chem. Phys.* **2013**, *138*, 184102, doi:10.1063/1.4804162.
22. Luchini, G.; Alegre-Requena, J.V.; Funes-Ardoiz, I.; Paton, R.S. GoodVibes: Automated Thermochemistry for Heterogeneous Computational Chemistry Data 2020.
23. Simón, L.; Goodman, J.M. How Reliable Are DFT Transition Structures? Comparison of GGA, Hybrid-Meta-GGA and Meta-GGA Functionals. *Org Biomol Chem* **2011**, *9*, 689–700, doi:10.1039/C0OB00477D.
24. Conformer-Rotamer Ensemble Sampling Tool 2022.
25. Zhao, Q.; Hsu, H.-H.; Savoie, B. Conformational Sampling for Transition State Searches on a Computational Budget. **2021**, doi:10.26434/chemrxiv-2021-xhxtc.
26. Velasco-Juárez, E.; Arpa, E.M. A Novel Partitioning Scheme for the Application of the Distortion/Interaction - Activation Strain Model to Intramolecular Reactions. *Theor. Chem. Acc.* **2021**, *140*, 107, doi:10.1007/s00214-021-02803-3.
27. Houk, K.N.; Bickelhaupt, M. Analyzing Reaction Rates with the Distortion Interaction-Activation Strain Model. *Angew. Chem. Int. Ed.* **2017**, *56*, 10070–10086, doi:10.1002/anie.201701486.
